# Supplementary material for: Highly enantioselective 1,6-addition of dienolates to coumarins and chromones through N-heterocyclic carbene catalysis
Source: Royal Society of Chemistry journal article supplement (doi:10.1039/d0qo00963f), 2020-01-01
Supplement: d0qo00963f1.pdf [file d0qo00963f1.pdf]

## Supporting Information

### Highly Enantioselective 1,6-Addition of Dienolates to Coumarins and Chromones through N-Heterocyclic Carbene Catalysis

Qiang Liu, Zhi-Xiang Wang\* and Xiang-Yu Chen\*

*School of Chemical Sciences, University of the Chinese Academy of Sciences, Beijing, 100049, China*

| Table of Contents                                                               | Page |
|---------------------------------------------------------------------------------|------|
| 1. General Information-----                                                     | 2    |
| 2. Asymmetric synthesis of functionalized cyanocoumarins ( <b>4-21</b> ) -----  | 3    |
| 3. Asymmetric synthesis of functionalized nitrochromones ( <b>22-39</b> ) ----- | 12   |
| 4. NMR Spectra -----                                                            | 23   |
| 5. HPLC Data -----                                                              | 59   |
| 6. References -----                                                             | 96   |

## 1. General information

- Chemicals were purchased from Acros or Aldrich and used without further purification unless otherwise noted. Solvents were predistilled according to standard laboratory methods.
- Cyanocoumarin-derived 1,6-Michael acceptors<sup>1</sup> and nitrochromone-derived 1,6-Michael acceptors<sup>2</sup> were prepared according to reported literatures.
- Chromatographic purification of the products was performed on Merck silica gel 60, particle size 0.040-0.063 mm (230-240 mesh, flash).
- Analytical TLC: SIL G-25 UV254 from Macherey&Nagel. Visualization of the developed TLC plates was performed with ultraviolet irradiation (254 nm) or by staining with basic potassium permanganate solution.
- Mass spectra were acquired on a Finnigan SSQ7000 (EI/CI) spectrometer and high resolution mass spectra on a Finnigan MAT 95 (EI/CI) or on a ThermoFisher Scientific LTQOrbitrap XL (ESI). All signals over 10% relative intensity are listed.
- IR spectra were taken on a Perkin-Elmer FT-IR Spectrum 100 using a Diamant/KRS5 ATR. Evaluation was done using the supplementary software. The absorption bands are given in wave numbers ( $\text{cm}^{-1}$ ).
- <sup>1</sup>H- and <sup>13</sup>C- NMR spectra were recorded at ambient temperature on Varian Mercury 300, VNMRS 600 and Inova 400 instruments. The chemical shifts are reported in ppm downfield of tetramethylsilane (TMS) and referenced to residual solvent peaks resonance as internal standard. The order of citation in parentheses is a) multiplicity (s = singlet, d = doublet, t = triplet, q = quartet, dd= doublet of doublet, ddd= doublet of doublet of doublet, td = triplet of doublet, m = multiplet), b) coupling constants, c) number of protons. Coupling constants (*J*) are reported in Hertz (Hz).
- Analytical HPLC was performed on a Hewlett-Packard 1100 Series instrument using chiral stationary phases (CHIRALPAK AS, CHIRALPAK IC, CHIRALPAK IB).

## 2 Asymmetric synthesis of functionalized cyanocoumarins

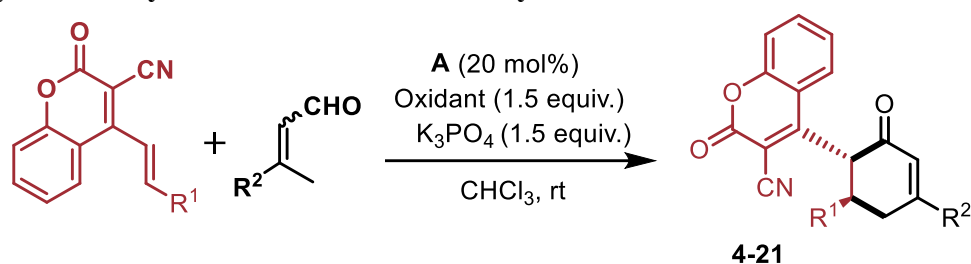

Pre-NHC

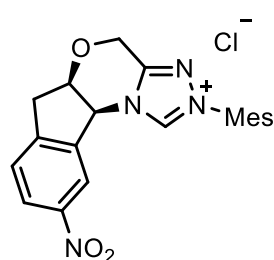

Oxidant

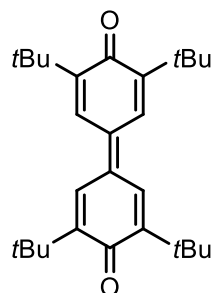

A 10 mL glass tube equipped with a stirring bar was charged with substrate cyanocoumarin (0.2 mmol, 1.0 equiv.), oxidant (0.3 mmol, 1.5 equiv., 124 mg), the enal (0.4 mmol, 2.0 equiv.),  $K_3PO_4$  (0.3 mmol, 1.5 equiv., 63.6 mg), 4Å MS (100 mg), NHC (0.04 mmol, 20 mol%, 18.6 mg) and anhydrous  $CHCl_3$  (2.0 mL). The resulting solution was flushed with argon and stirred at room temperature for 24 h and was directly purified by flash chromatography using *n*-hexane and ethyl acetate as the eluent to provide the desired product (**4-21**).

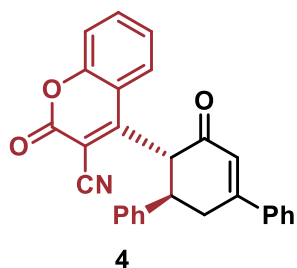

### 2-Oxo-4-((3'*R*,4'*R*)-5'-oxo-2',3',4',5'-tetrahydro-[1,1':3',1''-terphenyl]-4'-yl)-2H-chromene-3-carbonitrile (**4**)

Yield: 60.9 mg, 73%, yellow foam; **HPLC**: CHIRALPAK IC; *n*-Hexane/EtOH = 7/3; flow rate 1.0 mL/min; T = 30 °C; retention time: 11.10 min (minor), 15.29 min (major), e.r.: 99:1; **<sup>1</sup>H NMR (600 MHz, CDCl<sub>3</sub>)** δ 7.70 – 7.55 (m, 4H), 7.52 – 7.43 (m, 3H), 7.40 – 7.20 (m, 5H), 7.10 (d, *J* = 5.6 Hz, 2H), 6.76 (s, 1H), 4.73 (d, *J* = 13.1 Hz, 1H), 4.14 – 4.04 (m, 1H), 3.45 – 3.25 (m, 2H) ppm; **<sup>13</sup>C NMR (151 MHz, CDCl<sub>3</sub>)** δ 194.0, 162.4, 160.3, 155.9, 153.6, 138.4, 137.2, 134.6, 131.2, 129.2 (2C), 129.1 (2C), 128.5, 127.6, 127.0 (2C), 126.4 (2C), 124.8, 123.8, 118.3, 115.9, 113.7, 106.4, 59.6, 47.7, 36.5 ppm; **IR (ATR)**: 3455, 3048, 2227, 2095, 1734, 1660, 1602, 1551, 1493, 1446, 1363, 1243, 1148, 1074, 874, 751, 692 cm<sup>-1</sup>; **HRMS (ESI)**: *m/z* [M+Na]<sup>+</sup> calcd for C<sub>28</sub>H<sub>19</sub>NO<sub>3</sub>Na<sup>+</sup>: 440.1257; found 440.1243.

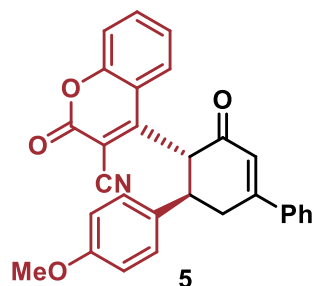

**4-((3'*R*,4'*R*)-4''-methoxy-5'-oxo-2',3',4',5'-tetrahydro-[1,1':3',1''-terphenyl]-4'-yl)-2-oxo-2H-chromene-3-carbonitrile (5)**

Yield: 58.1 mg, 65%, yellow foam; **HPLC**: CHIRALPAK IC; *n*-Hexane/EtOH = 7/3; flow rate 1.0 mL/min; T= 30 °C; retention time: 14.28 min (minor), 19.48 min (major), e.r.: 94.5:5.5; **<sup>1</sup>H NMR (600 MHz, CDCl<sub>3</sub>)** δ 7.68 – 7.56 (m, 4H), 7.52 – 7.42 (m, 3H), 7.38 – 7.30 (m, 2H), 7.01 (d, *J* = 8.0 Hz, 2H), 6.80 – 6.64 (m, 3H), 4.68 (d, *J* = 13.0 Hz, 1H), 4.07 – 4.04 (m, 1H), 3.75 (s, 3H), 3.40 – 3.20 (m, 2H) ppm; **<sup>13</sup>C NMR (151 MHz, CDCl<sub>3</sub>)** δ 194.3, 162.6, 160.4, 159.3, 156.1, 153.6, 137.3, 134.6, 131.1, 130.4, 129.1 (2C), 128.1 (2C), 127.7, 126.4 (2C), 124.8, 123.8, 118.3, 115.9, 114.5 (2C), 113.7, 106.4, 59.9, 55.2, 47.0, 36.9 ppm; **IR (ATR)**: 3454, 2922, 2230, 2063, 1729, 1657, 1601, 1552, 1510, 1449, 1366, 1304, 1246, 1178, 1080, 1030, 961, 881, 830, 753, 692 cm<sup>-1</sup>; **HRMS (ESI)**: *m/z* [M+Na]<sup>+</sup> calcd for C<sub>29</sub>H<sub>21</sub>NO<sub>4</sub>Na<sup>+</sup>: 470.1363; found 470.1346.

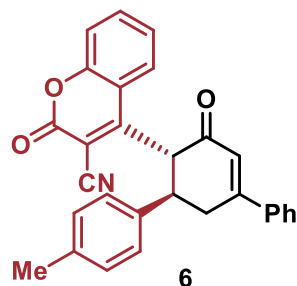

**4-((3'*R*,4'*R*)-4''-Methyl-5'-oxo-2',3',4',5'-tetrahydro-[1,1':3',1''-terphenyl]-4'-yl)-2-oxo-2H-chromene-3-carbonitrile (6)**

Yield: 72.3 mg, 85%, yellow foam; **HPLC**: CHIRALPAK IC; *n*-Hexane/EtOH = 7/3; flow rate 1.0 mL/min; T= 30 °C; retention time: 11.40 min (minor), 15.76 min (major), e.r.: 94.5:5.5; **<sup>1</sup>H NMR (600 MHz, CDCl<sub>3</sub>)** δ 7.70 – 7.70 (m, 4H), 7.53 – 7.40 (m, 3H), 7.38 – 7.30 (m, 2H), 7.01 (dd, *J* = 35.6, 6.8 Hz, 4H), 6.74 (s, 1H), 4.70 (d, *J* = 12.9 Hz, 1H), 4.12 - 4.00 (m, 1H), 3.42 – 3.20 (m, 2H), 2.27 (s, 3H) ppm; **<sup>13</sup>C NMR (151 MHz, CDCl<sub>3</sub>)** δ 194.2, 162.6, 160.4, 156.1, 153.5, 138.2, 137.2, 135.4, 134.6, 131.1, 129.9 (2C), 129.1 (2C), 127.7, 126.9 (2C), 126.4 (2C), 124.8, 123.8, 118.3, 115.9, 113.7, 106.3, 59.7, 47.4, 36.7, 21.1 ppm; **IR (ATR)**: 3455, 2923, 2230, 2062, 1730, 1657, 1601, 1553, 1495, 1447, 1365, 1244, 1079, 960, 879, 813, 753, 692 cm<sup>-1</sup>; **HRMS (ESI)**: *m/z* [M+Na]<sup>+</sup> calcd for C<sub>29</sub>H<sub>21</sub>NO<sub>3</sub>Na<sup>+</sup>: 454.1414; found 454.1394.



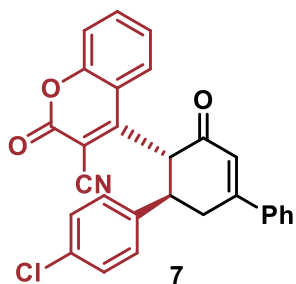

**4-((3'R,4'R)-4''-Chloro-5'-oxo-2',3',4',5'-tetrahydro-[1,1':3',1''-terphenyl]-4'-yl)-2-oxo-2H-chromene-3-carbonitrile (7)**

Yield: 76.7 mg, 85%, yellow foam; **HPLC**: CHIRALPAK IC; *n*-Hexane/EtOH = 7/3; flow rate 1.0 mL/min; T= 30 °C; retention time: 9.88 min (minor), 13.00 min (major), e.r.: 95.5:4.5; **<sup>1</sup>H NMR (600 MHz, CDCl<sub>3</sub>)** δ 7.68 – 7.55 (m, 4H), 7.52 – 7.43 (m, 3H), 7.39 – 7.31 (m, 2H), 7.22 (d, *J* = 7.7 Hz, 2H), 7.05 (d, *J* = 7.7 Hz, 2H), 6.75 (s, 1H), 4.68 (d, *J* = 13.0 Hz, 1H), 4.14 – 4.05 (m, 1H), 3.37 – 3.23 (m, 2H) ppm; **<sup>13</sup>C NMR (151 MHz, CDCl<sub>3</sub>)** δ 193.7, 162.2, 160.1, 155.9, 153.6, 137.0, 137.0, 134.8, 134.2, 131.3, 129.5 (2C), 129.2 (2C), 128.4 (2C), 127.5, 126.4 (2C), 125.0, 123.8, 118.4, 115.7, 113.7, 106.3, 59.23, 47.0, 36.5 ppm; **IR (ATR)**: 3452, 2922, 2230, 2060, 1730, 1657, 1600, 1551, 1491, 1447, 1364, 1243, 1143, 1082, 967, 923, 877, 827, 752, 690 cm<sup>-1</sup>; **HRMS (ESI)**: *m/z* [M+Na]<sup>+</sup> calcd for C<sub>28</sub>H<sub>18</sub>NO<sub>3</sub>ClNa<sup>+</sup>: 474.0867; found 474.0846.

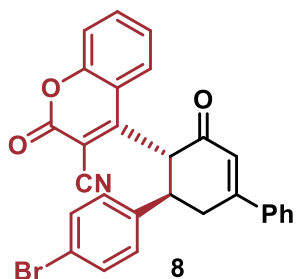

**4-((3'R,4'R)-4''-Bromo-5'-oxo-2',3',4',5'-tetrahydro-[1,1':3',1''-terphenyl]-4'-yl)-2-oxo-2H-chromene-3-carbonitrile (8)**

Yield: 69.3 mg, 70%, yellow foam; **HPLC**: CHIRALPAK IC; *n*-Hexane/EtOH = 7/3; flow rate 1.0 mL/min; T= 30 °C; retention time: 10.28 min (minor), 13.70 min (major), e.r.: 95.5:4.5; **<sup>1</sup>H NMR (600 MHz, CDCl<sub>3</sub>)** δ 7.69 – 7.60 (m, 3H), 7.57 – 7.44 (m, 4H), 7.43 – 7.28 (m, 4H), 7.00 (d, *J* = 7.5 Hz, 2H), 6.76 (s, 1H), 4.70 (d, *J* = 13.0 Hz, 1H), 4.12 – 4.04 (m, 1H), 3.38 – 3.23 (m, 2H) ppm; **<sup>13</sup>C NMR (151 MHz, CDCl<sub>3</sub>)** δ 193.7, 162.0, 160.0, 153.6, 155.9, 137.4, 137.0, 134.8, 132.4 (2C), 131.3, 129.2 (2C), 128.7 (2C), 127.5, 126.4 (2C), 124.9, 123.8, 122.4, 118.5, 115.7, 113.7, 106.4, 59.2, 47.1, 36.5 ppm; **IR (ATR)**: 3454, 2233, 2100, 1998, 1731, 1658, 1600, 1550, 1489, 1445, 1364, 1226, 1145, 1076, 1005, 909, 823, 747 cm<sup>-1</sup>; **HRMS (ESI)**: *m/z* [M+Na]<sup>+</sup> calcd for C<sub>28</sub>H<sub>18</sub>NO<sub>3</sub>BrNa<sup>+</sup>: 518.0362; found 518.0344.

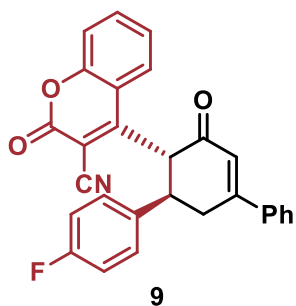

**4-((3'R,4'R)-4''-fluoro-5'-oxo-2',3',4',5'-tetrahydro-[1,1':3',1''-terphenyl]-4'-yl)-2-oxo-2H-chromene-3-carbonitrile (9)**

Yield: 64.4 mg, 74%, yellow foam; **HPLC**: CHIRALPAK IC; *n*-Hexane/EtOH = 7/3; flow rate 1.0 mL/min; T= 30 °C; retention time: 9.79 min (minor), 12.88 min (major), e.r.: 99.5:0.5; **<sup>1</sup>H NMR (600 MHz, CDCl<sub>3</sub>)** δ 7.70 – 7.55 (m, 4H), 7.53 – 7.43 (m, 3H), 7.40 – 7.31 (m, 2H), 7.11 – 7.06 (m, 2H), 6.95 – 6.93 (m, 2H), 6.75 (s, 1H), 4.68 (d, *J* = 13.0 Hz, 1H), 4.19 – 4.00 (m, 1H), 3.42 – 3.20 (m, 2H) ppm; **<sup>13</sup>C NMR (151 MHz, CDCl<sub>3</sub>)** δ 193.8, 163.1, 162.3, 161.5, 160.2, 153.6, 137.1, 134.7, 134.3, 131.2, 129.1 (2C), 128.7, 128.7, 127.5, 126.4 (2C), 124.9, 123.8, 118.4, 116.3, 116.2, 115.7, 113.7, 106.4, 59.6, 46.9, 36.6 ppm; **IR (ATR)**: 3456, 2930, 2231, 1734, 1663, 1602, 1554, 1507, 1447, 1366, 1226, 1154, 1083, 942, 837, 755, 691 cm<sup>-1</sup>; **HRMS (ESI)**: *m/z* [M+Na]<sup>+</sup> calcd for C<sub>28</sub>H<sub>18</sub>NO<sub>3</sub>FNa<sup>+</sup>: 458.1163; found 458.1147.

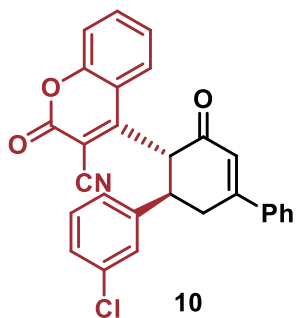

**4-((3'R,4'R)-3''-chloro-5'-oxo-2',3',4',5'-tetrahydro-[1,1':3',1''-terphenyl]-4'-yl)-2-oxo-2H-chromene-3-carbonitrile (10)**

Yield: 65.8 mg, 73%, yellow foam; **HPLC**: CHIRALPAK IC; *n*-Hexane/EtOH = 7/3; flow rate 1.0 mL/min; T= 30 °C; retention time: 9.10 min (minor), 13.23 min (major), e.r.: 96:4; **<sup>1</sup>H NMR (600 MHz, CDCl<sub>3</sub>)** δ 7.70 – 7.58 (m, 3H), 7.55 – 7.41 (m, 4H), 7.40 – 7.30 (m, 2H), 7.25 – 7.18 (m, 2H), 7.05 (d, *J* = 7.9 Hz, 2H), 6.75 (s, 1H), 4.69 (d, *J* = 12.9 Hz, 1H), 4.00 – 4.10 (m, 1H), 3.37 – 3.21 (m, 2H) ppm; **<sup>13</sup>C NMR (151 MHz, CDCl<sub>3</sub>)** δ 193.6, 162.0, 160.0, 155.9, 153.6, 140.5, 137.0, 135.0, 134.8, 131.3, 130.6, 129.2, 128.7, 127.45, 126.4, 125.1, 125.0, 123.8, 118.4, 115.7, 113.6, 106.4, 59.1, 47.3, 36.3 ppm; **IR (ATR)**: 3454, 2925, 2229, 2076, 1730, 1658, 1600, 1553, 1487, 1445, 1363, 1245, 1145, 1079, 1046, 996, 877, 836, 754, 694 cm<sup>-1</sup>; **HRMS (ESI)**: *m/z* [M+Na]<sup>+</sup> calcd for C<sub>28</sub>H<sub>18</sub>NO<sub>3</sub>ClNa<sup>+</sup>: 474.0867; found 474.0851.

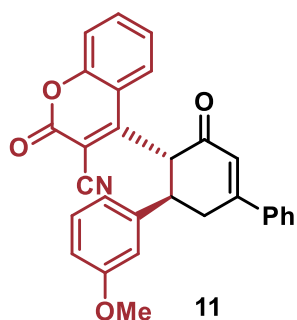

**4-((3'*R*,4'*R*)-3''-Methoxy-5'-oxo-2',3',4',5'-tetrahydro-[1,1':3,1''-terphenyl]-4'-yl)-2-oxo-2H-chromene-3-carbonitrile (11)**

Yield: 64.4 mg, 72%, yellow foam; CHIRALPAK IC; *n*-Hexane/EtOH = 7/3; flow rate 1.0 mL/min; T= 30 °C; retention time: 11.66 min (minor), 16.35 min (major), e.r.: 93:7; <sup>1</sup>H NMR (600 MHz, CDCl<sub>3</sub>) δ 7.66 – 7.56 (m, 4H), 7.51 – 7.43 (m, 3H), 7.38 – 7.32 (m, 2H), 7.16 – 7.11 (m, 1H), 6.77 – 6.73 (m, 2H), 6.69 – 6.58 (m, 2H), 4.73 (d, *J* = 13.1 Hz, 1H), 4.09 – 4.04 (m, 1H), 3.74 (s, 3H), 3.41 – 3.26 (m, 2H) ppm; <sup>13</sup>C NMR (151 MHz, CDCl<sub>3</sub>) δ 194.1, 162.4, 160.3, 159.9, 156.1, 139.9, 137.2, 134.6, 131.2, 130.3, 129.1, 127.6, 126.4, 124.9, 123.8, 119.3, 118.3, 115.9, 114.2, 113.8, 112.3, 106.3, 59.4, 55.2, 47.7, 36.3 ppm; HPLC: IR (ATR): 2924, 2229, 2070, 1728, 1656, 1597, 1557, 1489, 1447, 1370, 1268, 1151, 1045, 861, 755, 697 cm<sup>-1</sup>; HRMS (ESI): *m/z* [M+Na]<sup>+</sup> calcd for C<sub>29</sub>H<sub>21</sub>NO<sub>4</sub>Na<sup>+</sup>: 470.1363; found 470.1350.

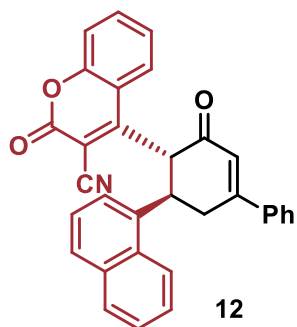

**4-((3*R*,4*R*)-3-(Naphthalen-1-yl)-5-oxo-2,3,4,5-tetrahydro-[1,1'-biphenyl]-4-yl)-2-oxo-2H-chromene-3-carbonitrile (12)**

Yield: 56.0 mg, 60%, yellow foam; HPLC: CHIRALPAK IC; *n*-Hexane/EtOH = 7/3; flow rate 1.0 mL/min; T= 30 °C; retention time: 11.76 min (minor), 21.03 min (major), e.r.: 92:8; <sup>1</sup>H NMR (400 MHz, CDCl<sub>3</sub>) δ 7.94 (d, *J* = 7.2 Hz, 1H), 7.83 – 7.72 (m, 3H), 7.65 (d, *J* = 6.4 Hz, 2H), 7.61 – 7.55 (m, 2H), 7.48 – 7.40 (m, 5H), 7.32 – 7.26 (m, 1H), 7.14 (d, *J* = 7.8 Hz, 1H), 7.07 – 7.03 (m, 1H), 6.84 (s, 1H), 5.18 – 5.08 (m, 1H), 4.93 (d, *J* = 12.9 Hz, 1H), 3.47 – 3.34 (m, 2H) ppm; <sup>13</sup>C NMR (151 MHz, CDCl<sub>3</sub>) δ 194.5, 162.2, 160.5, 155.8, 153.6, 137.1, 134.7, 134.5, 133.9, 131.2, 130.5, 129.3, 129.1 (2C), 129.0, 127.6, 126.4 (2C), 126.0, 125.8, 125.7, 124.9, 124.7, 123.8, 121.0, 118.3, 115.9, 113.8, 106.5, 59.4, 40.3, 37.2 ppm; IR (ATR): 3059, 2926, 2229, 2072, 1720, 1660, 1600, 1551, 1495, 1447, 1363, 1320, 1246, 1216, 1080, 1052, 923, 870, 800, 763, 681 cm<sup>-1</sup>; HRMS (ESI): *m/z* [M+Na]<sup>+</sup> calcd for C<sub>32</sub>H<sub>21</sub>NO<sub>3</sub>Na<sup>+</sup>: 490.1414; found 490.1398.

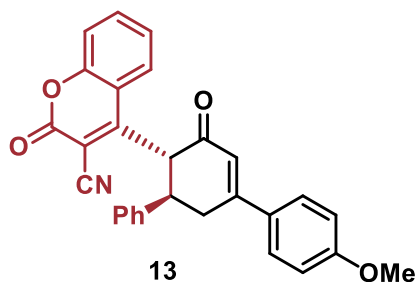

**4-((3'R,4'R)-4-Methoxy-5'-oxo-2',3',4',5'-tetrahydro-[1,1':3',1''-terphenyl]-4'-yl)-2-oxo-2H-chromene-3-carbonitrile (13)**

Yield: 44.7 mg, 50%, yellow foam; **HPLC**: CHIRALPAK IC; *n*-Hexane/EtOH = 7/3; flow rate 1.0 mL/min; T= 30 °C; retention time: 18.24 min (major), 22.61 min (minor), e.r.: 99:1; **<sup>1</sup>H NMR (600 MHz, CDCl<sub>3</sub>)** δ 7.62 (dd, *J* = 19.9, 8.3 Hz, 4H), 7.37 – 7.30 (m, 2H), 7.27 – 7.22 (m, 3H), 7.09 (d, *J* = 6.2 Hz, 2H), 6.98 (d, *J* = 8.6 Hz, 2H), 6.73 (s, 1H), 4.70 (d, *J* = 13.0 Hz, 1H), 4.11 – 4.02 (m, 1H), 3.88 (s, 3H), 3.37 – 3.26 (m, 2H) ppm; **<sup>13</sup>C NMR (151 MHz, CDCl<sub>3</sub>)** δ 194.0, 162.6, 162.2, 159.6, 156.0, 153.5, 138.5, 134.5, 129.2 (2C), 129.1, 128.5, 128.2 (2C), 127.7, 127.0 (2C), 124.8, 121.8, 118.3, 115.9, 114.5 (2C), 113.7, 106.3, 59.5, 55.5, 47.7, 36.2 ppm; **IR (ATR)**: 2926, 2229, 2068, 1729, 1659, 1596, 1556, 1486, 1446, 1369, 1264, 1154, 1044, 860, 754, 695 cm<sup>-1</sup>; **HRMS (ESI)**: *m/z* [M+Na]<sup>+</sup> calcd for C<sub>29</sub>H<sub>21</sub>NO<sub>4</sub>Na<sup>+</sup>: 470.1363; found 470.1346.

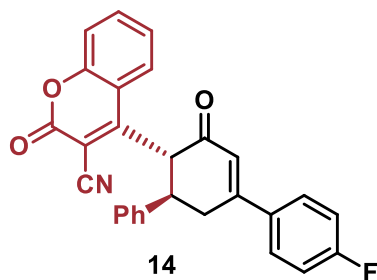

**4-((3'R,4'R)-4-Fluoro-5'-oxo-2',3',4',5'-tetrahydro-[1,1':3',1''-terphenyl]-4'-yl)-2-oxo-2H-chromene-3-carbonitrile (14)**

Yield: 74.8 mg, 86%, yellow foam; **HPLC**: CHIRALPAK IC; *n*-Hexane/EtOH = 7/3; flow rate 1.0 mL/min; T= 30 °C; retention time: 9.97 min (minor), 13.32 min (major), e.r.: 94:6; **<sup>1</sup>H NMR (400 MHz, CDCl<sub>3</sub>)** δ 7.71 – 7.53 (m, 4H), 7.52 – 7.43 (m, 1H), 7.39 – 7.32 (m, 2H), 7.26 – 7.04 (m, 6H), 6.75 (dd, *J* = 18.6, 1.9 Hz, 1H), 4.73 (dd, *J* = 13.1, 3.8 Hz, 1H), 4.16 – 4.02 (m, 1H), 3.44 – 3.21 (m, 2H) ppm; **<sup>13</sup>C NMR (151 MHz, CDCl<sub>3</sub>)** δ 193.9, 164.4 (*J*<sub>C-F</sub> = 253.7), 162.3, 158.9, 155.9, 153.5, 138.3, 134.6, 133.3, 129.3 (2C), 128.5 (2C), 128.5 (2C), 127.6, 127.0 (2C), 124.8, 123.6, 118.3, 116.3 (*J*<sub>C-F</sub> = 22.7), 115.8, 113.6, 106.4, 59.5, 47.6, 36.5 ppm; **IR (ATR)**: 2925, 2230, 2159, 1729, 1660, 1599, 1554, 1508, 1449, 1367, 1287, 1230, 1160, 1080, 1041, 909, 883, 833, 753, 698 cm<sup>-1</sup>; **HRMS (ESI)**: *m/z* [M+Na]<sup>+</sup> calcd for C<sub>28</sub>H<sub>18</sub>NO<sub>3</sub>FNa<sup>+</sup>: 458.1163; found 458.1145.

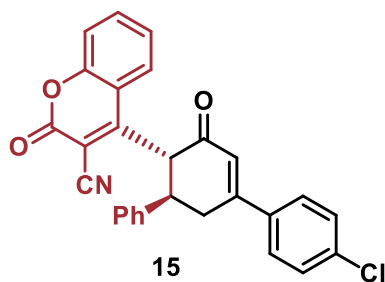

**4-((3'R,4'R)-4-chloro-5'-oxo-2',3',4',5'-tetrahydro-[1,1':3,1''-terphenyl]-4'-yl)-2-oxo-2H-chromene-3-carbonitrile (15)**

Yield: 55.9 mg, 62%, yellow foam; **HPLC**: CHIRALPAK IC; *n*-Hexane/EtOH = 7/3; flow rate 1.0 mL/min; T= 30 °C; retention time: 10.27 min (minor), 13.97 min (major), e.r.: 94:6; **<sup>1</sup>H NMR (600 MHz, CDCl<sub>3</sub>)** δ 7.68 – 7.68 (m, 1H), 7.62 – 7.52 (m, 3H), 7.49 – 7.30 (m, 4H), 7.26 – 7.06 (m, 5H), 6.74 (s, 1H), 4.72 (d, *J* = 13.1 Hz, 1H), 4.12 – 4.08 (m, 1H), 3.43 – 3.20 (m, 2H) ppm; **<sup>13</sup>C NMR (151 MHz, CDCl<sub>3</sub>)** δ 193.9, 162.2, 158.8, 155.9, 153.5, 138.2, 137.4, 135.6, 134.7, 129.4 (2C), 129.3 (2C), 128.6, 127.7 (2C), 127.6, 127.0 (2C), 124.9, 124.0, 118.4, 115.8, 113.7, 106.4, 59.5, 47.6, 36.4 ppm; **IR (ATR)**: 3455, 2922, 2229, 2163, 1907, 1729, 1659, 1599, 1550, 1489, 1451, 1363, 1221, 1086, 1009, 962, 884, 823, 752, 700 cm<sup>-1</sup>; **HRMS (ESI)**: *m/z* [M+Na]<sup>+</sup> calcd for C<sub>28</sub>H<sub>18</sub>NO<sub>3</sub>ClNa<sup>+</sup>: 474.0867; found 474.0858.

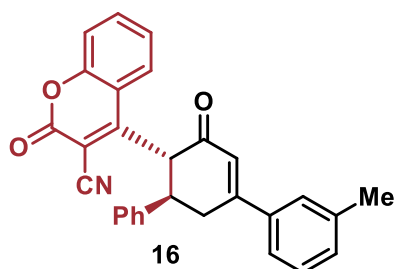

**4-((3'R,4'R)-3-Methyl-5'-oxo-2',3',4',5'-tetrahydro-[1,1':3,1''-terphenyl]-4'-yl)-2-oxo-2H-chromene-3-carbonitrile (16)**

Yield: 64.7 mg, 75%, yellow foam; **HPLC**: CHIRALPAK IC; *n*-Hexane/EtOH = 7/3; flow rate 1.0 mL/min; T= 30 °C; retention time: 11.05 min (minor), 15.13 min (major), e.r.: 96.5:3.5; **<sup>1</sup>H NMR (600 MHz, CDCl<sub>3</sub>)** δ 7.68 – 7.63 (t, *J* = 7.6 Hz, 1H), 7.59 (d, *J* = 7.9 Hz, 1H), 7.49 – 7.41 (m, 2H), 7.39 – 7.21 (m, 7H), 7.10 (d, *J* = 5.9 Hz, 2H), 6.76 (d, *J* = 1.7 Hz, 1H), 4.72 (d, *J* = 13.1 Hz, 1H), 4.11 – 4.06 (m, 1H), 3.43 – 3.24 (m, 2H), 2.42 (s, 3H) ppm; **<sup>13</sup>C NMR (151 MHz, CDCl<sub>3</sub>)** δ 194.1, 162.4, 160.5, 156.0, 153.6, 138.9, 138.4, 137.2, 134.6, 132.0, 129.3 (2C), 129.0, 128.5, 127.6, 127.1, 127.0 (2C), 124.8, 123.7, 123.6, 118.3, 115.9, 113.7, 106.4, 59.6, 47.8, 36.5, 21.5 ppm; **IR (ATR)**: 3450, 2922, 2230, 2075, 1946, 1729, 1657, 1598, 1533, 1448, 1363, 1225, 1079, 1038, 969, 873, 753, 697 cm<sup>-1</sup>; **HRMS (ESI)**: *m/z* [M+Na]<sup>+</sup> calcd for C<sub>29</sub>H<sub>21</sub>NO<sub>3</sub>Na<sup>+</sup>: 454.1414; found 454.1402.

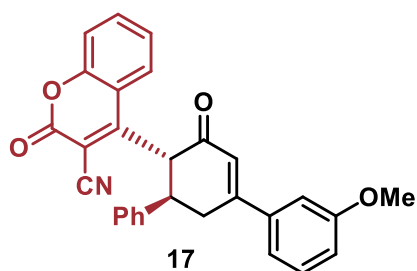

**4-((3'*R*,4'*R*)-3-Methoxy-5'-oxo-2',3',4',5'-tetrahydro-[1,1':3',1''-terphenyl]-4'-yl)-2-oxo-2H-chromene-3-carbonitrile (17)**

Yield: 69.7 mg, 78%, yellow foam; **HPLC**: CHIRALPAK IC; *n*-Hexane/EtOH = 7/3; flow rate 1.0 mL/min; T = 30 °C; retention time: 14.10 min (minor), 18.27 min (major), e.r.: 94:6; **<sup>1</sup>H NMR (400 MHz, CDCl<sub>3</sub>)** δ 7.67- 7.61 (m, 1H), 7.59 (d, *J* = 8.0 Hz, 1H), 7.42 – 7.29 (m, 3H), 7.28 – 7.18 (m, 4H), 7.16 – 6.99 (m, 4H), 6.74 (d, *J* = 1.6 Hz, 1H), 4.71 (d, *J* = 13.0 Hz, 1H), 4.12 – 4.06 (m, 1H), 3.85 (s, 3H), 3.43 – 3.22 (m, 2H) ppm; **<sup>13</sup>C NMR (101 MHz, CDCl<sub>3</sub>)** δ 194.1, 162.4, 160.3, 160.0, 156.0, 153.5, 138.7, 138.4, 134.6, 130.1, 129.2 (2C), 128.5, 127.7, 127.0 (2C), 124.9, 124.0, 118.8, 118.3, 116.6, 115.8, 113.7, 112.0, 106.3, 59.6, 55.5, 47.7, 36.5 ppm; **IR (ATR)**: 3449, 2923, 2230, 2161, 2077, 1920, 1727, 1654, 1596, 1556, 1510, 1449, 1368, 1238, 1178, 1074, 1028, 960, 877, 826, 753, 701 cm<sup>-1</sup>; **HRMS (ESI)**: *m/z* [M+Na]<sup>+</sup> calcd for C<sub>29</sub>H<sub>21</sub>NO<sub>4</sub>Na<sup>+</sup>: 470.1363; found 470.1345.

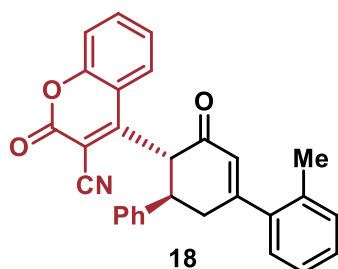

**4-((3'*R*,4'*R*)-2-Methyl-5'-oxo-2',3',4',5'-tetrahydro-[1,1':3',1''-terphenyl]-4'-yl)-2-oxo-2H-chromene-3-carbonitrile (18)**

Yield: 53.4 mg, 62%, yellow foam; **HPLC**: CHIRALPAK IC; *n*-Hexane/EtOH = 7/3; flow rate 1.0 mL/min; T = 30 °C; retention time: 7.05 min (minor), 10.91 min (major), e.r.: 97:3; **<sup>1</sup>H NMR (600 MHz, CDCl<sub>3</sub>)** δ 7.70 – 7.56 (m, 2H), 7.42 – 7.37 (m, 1H), 7.37 – 7.18 (m, 8H), 7.13 – 7.03 (m, 2H), 6.35 (d, *J* = 2.4 Hz, 1H), 4.72 (d, *J* = 13.0 Hz, 1H), 4.15 – 4.05 (m, 1H), 3.39 – 3.28 (m, 1H), 3.01 (dd, *J* = 18.0, 2.4 Hz 1H), 2.46 (s, 3H) ppm; **<sup>13</sup>C NMR (151 MHz, CDCl<sub>3</sub>)** δ 193.8, 164.0, 162.3, 155.9, 153.6, 139.2, 138.1, 134.6, 134.1, 131.1, 129.3, 129.2 (2C), 128.5, 127.5, 127.4, 127.1, 126.9 (2C), 126.2, 124.9, 118.4, 115.9, 113.7, 106.4, 59.9, 48.1, 39.4, 20.5 ppm; **IR (ATR)**: 3451, 2923, 2229, 2157, 1908, 1728, 1664, 1601, 1551, 1489, 1450, 1365, 1284, 1243, 1214, 1187, 1076, 1039, 968, 884, 828, 753, 699 cm<sup>-1</sup>; **HRMS (ESI)**: *m/z* [M+Na]<sup>+</sup> calcd for C<sub>29</sub>H<sub>21</sub>NO<sub>3</sub>Na<sup>+</sup>: 454.1414; found 454.1400.

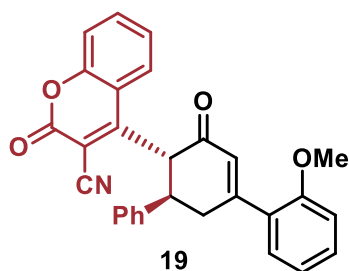

**4-((3'R,4'R)-2-Methoxy-5'-oxo-2',3',4',5'-tetrahydro-[1,1':3',1''-terphenyl]-4'-yl)-2-oxo-2H-chromene-3-carbonitrile (19)**

Yield: 53.6 mg, 60%, yellow foam; **HPLC**: CHIRALPAK IC; *n*-Hexane/EtOH = 7/3; flow rate 1.0 mL/min; T= 30 °C; retention time: 10.99 min (minor), 13.41 min (major), e.r.: 97.5:2.5; **<sup>1</sup>H NMR (600 MHz, CDCl<sub>3</sub>)** δ 7.67 – 7.62 (m, 2H), 7.45 – 7.30 (m, 4H), 7.24 – 7.17 (m, 3H), 7.09 (d, *J* = 6.6 Hz, 2H), 7.04 (t, *J* = 7.2 Hz, 1H), 6.99 (d, *J* = 8.2 Hz, 1H), 6.59 (s, 1H), 4.73 (d, *J* = 12.9 Hz, 1H), 4.11 – 4.04 (m, 1H), 3.89 (s, 3H), 3.52 – 3.42 (m, 1H), 3.21 (dd, *J* = 18.0, 3.0 Hz, 1H) ppm; **<sup>13</sup>C NMR (151 MHz, CDCl<sub>3</sub>)** δ 194.3, 162.9, 162.1, 156.9, 156.1, 153.5, 138.7, 134.6, 131.6, 129.1 (2C), 129.0, 128.3, 127.8, 127.1 (2C), 126.7, 126.6, 125.0, 121.0, 118.2, 116.0, 113.8, 111.4, 106.2, 60.1, 55.6, 48.2, 38.2 ppm; **IR (ATR)**: 2926, 2227, 2157, 2080, 1914, 1725, 1672, 1602, 1549, 1484, 1448, 1359, 1287, 1242, 1153, 1078, 1029, 930, 871, 746, 702 cm<sup>-1</sup>; **HRMS (ESI)**: *m/z* [M+Na]<sup>+</sup> calcd for C<sub>29</sub>H<sub>21</sub>NO<sub>4</sub>Na<sup>+</sup>: 470.1363; found 470.1343.

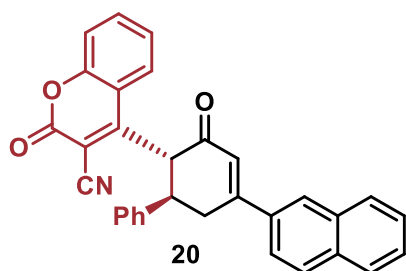

**4-((1R,2R)-5-(Naphthalen-2-yl)-3-oxo-1,2,3,6-tetrahydro-[1,1'-biphenyl]-2-yl)-2-oxo-2H-chromene-3-carbonitrile (20)**

Yield: 84.1 mg, 90%, yellow foam; **HPLC**: CHIRALPAK IC; *n*-Hexane/EtOH = 7/3; flow rate 1.0 mL/min; T= 30 °C; retention time: 14.41 min (minor), 18.82 min (major), e.r.: 99:1; **<sup>1</sup>H NMR (600 MHz, CDCl<sub>3</sub>)** δ 8.12 (s, 1H), 7.96 – 7.83 (m, 3H), 7.78 – 7.51 (m, 5H), 7.40 – 7.36 (m, 1H), 7.35 – 7.08 (m, 6H), 6.91 (s, 1H), 4.77 (d, *J* = 13.0 Hz, 1H), 4.20 – 4.10 (m, 1H), 3.51 – 3.42 (m, 2H); **<sup>13</sup>C NMR (151 MHz, CDCl<sub>3</sub>)** δ 194.1, 162.5, 159.8, 156.0, 153.5, 138.5, 134.7, 234.4, 134.2, 133.0, 129.3 (2C), 129.0, 128.9, 128.6, 128.0, 127.8, 127.7, 127.1 (2C), 127.1, 127.1, 124.9, 124.0, 123.0, 118.3, 115.9, 113.7, 106.3, 59.6, 47.7, 36.4 ppm; **IR (ATR)**: 3452, 3056, 2321, 2228, 2082, 1898, 1730, 1658, 1597, 1552, 1493, 1447, 1369, 1276, 1223, 1146, 1077, 904, 854, 814, 751, 699 cm<sup>-1</sup>; **HRMS (ESI)**: *m/z* [M+Na]<sup>+</sup> calcd for C<sub>32</sub>H<sub>21</sub>NO<sub>3</sub>Na<sup>+</sup>: 490.1414; found 490.1394.

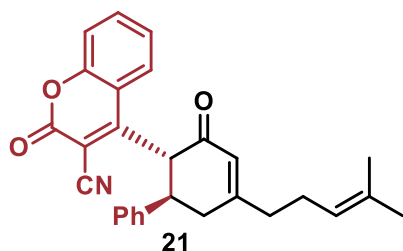

**4-((1*R*,2*R*)-5-(4-Methylpent-3-en-1-yl)-3-oxo-1,2,3,6-tetrahydro-[1,1'-biphenyl]-2-yl)-2-oxo-2H-chromene-3-carbonitrile (21)**

Yield: 42.3 mg, 50%, yellow foam; **HPLC**: CHIRALPAK IC; *n*-Hexane/EtOH = 7/3; flow rate 1.0 mL/min; T= 30 °C; retention time: 7.34 min (minor), 12.98 min (major), e.r.: 94:6; **<sup>1</sup>H NMR (400 MHz, CDCl<sub>3</sub>)** δ 7.65 – 7.61 (m, 1H), 7.50 (d, *J* = 7.8 Hz, 1H), 7.35 – 7.31 (m, 2H), 7.24 – 7.16 (m, 3H), 7.05 – 6.97 (m, 2H), 6.22 (s, 1H), 5.14 (t, *J* = 7.0 Hz, 1H), 4.56 (d, *J* = 13.0 Hz, 1H), 3.95 – 3.82 (m, 1H), 3.04 – 2.93 (m, 1H), 2.71 (dd, *J* = 18.3, 4.4 Hz, 1H), 2.48 – 2.25 (m, 4H), 1.74 (s, 3H), 1.66 (s, 3H) ppm; **<sup>13</sup>C NMR (151 MHz, CDCl<sub>3</sub>)** δ 193.9, 167.1, 162.5, 155.9, 153.5, 138.4, 134.5, 133.5, 129.0, 129.1 (2C), 128.4, 127.6, 126.9 (2C), 126.9, 124.7, 122.2, 118.3, 115.9, 113.6, 106.2, 59.7, 47.6, 38.2, 38.1, 25.7, 25.5, 17.8 ppm; **IR (ATR)**: 3422, 2922, 2229, 2168, 2106, 1988, 1914, 1712, 1661, 1600, 1553, 1496, 1448, 1377, 1303, 1216, 1152, 1085, 1040, 992, 903, 867, 842, 759, 701 cm<sup>-1</sup>; **HRMS (ESI)**: *m/z* [M+Na]<sup>+</sup> calcd for C<sub>28</sub>H<sub>25</sub>NO<sub>3</sub>Na<sup>+</sup>: 446.1727; found 446.1726.

**3 Asymmetric synthesis of functionalized nitrochromones.**

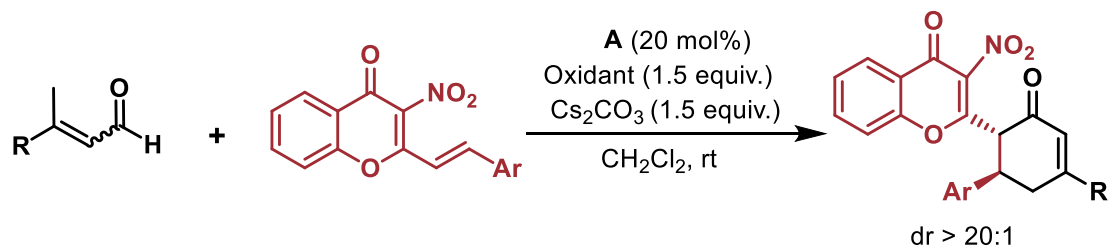

A 10 mL glass tube equipped with a stirring bar was charged with nitrochromones (0.2 mmol, 1.0 equiv.), oxidant (0.3 mmol, 1.5 equiv., 124 mg), the enal (0.4 mmol, 2.0 equiv.), Cs<sub>2</sub>CO<sub>3</sub> (0.3 mmol, 1.5 equiv., 97.7 mg), 4Å MS (100 mg), NHC (0.04 mmol, 20 mol%, 18.6 mg) and anhydrous DCM (2.0 mL). The resulting solution was flushed with argon and stirred at room temperature for 24 h and was directly purified by flash chromatography using *n*-hexane and ethyl acetate (4:1) as the eluent to provide the desired product (**22-39**).

**Table S1** Optimization of reaction conditions.



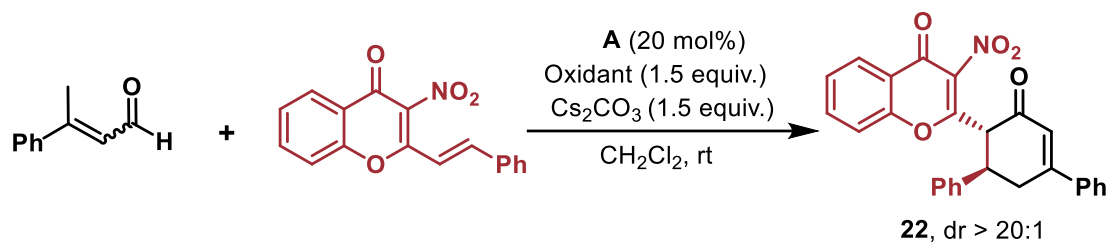

| Entry | Solvent            | Base                            | Yield of <b>22</b> (%) <sup>a</sup> | Er <sup>b</sup> |
|-------|--------------------|---------------------------------|-------------------------------------|-----------------|
| 1     | Toluene            | Cs <sub>2</sub> CO <sub>3</sub> | 76                                  | 89:11           |
| 2     | Toluene            | K <sub>2</sub> CO <sub>3</sub>  | 70                                  | 85:15           |
| 3     | Toluene            | Na <sub>2</sub> CO <sub>3</sub> | 72                                  | 85:15           |
| 4     | Toluene            | CsOAc                           | 77                                  | 86:14           |
| 5     | Toluene            | KOAc                            | 75                                  | 86:14           |
| 6     | Toluene            | K <sub>3</sub> PO <sub>4</sub>  | 76                                  | 86.5:13.5       |
| 7     | Toluene            | KHCO <sub>3</sub>               | 50                                  | 85:15           |
| 8     | Toluene            | DIPEA                           | trace                               | --              |
| 9     | CHCl <sub>3</sub>  | Cs <sub>2</sub> CO <sub>3</sub> | 56                                  | 94:6            |
| 10    | DCM                | Cs <sub>2</sub> CO <sub>3</sub> | 65                                  | 94.5:5.5        |
| 11    | CH <sub>3</sub> CN | Cs <sub>2</sub> CO <sub>3</sub> | 52                                  | 85.5:14.5       |
| 12    | Mesitylene         | Cs <sub>2</sub> CO <sub>3</sub> | 60                                  | 82:18           |
| 14    | MTBE               | Cs <sub>2</sub> CO <sub>3</sub> | 56                                  | 84.5:15.5       |
| 15    | Dioxane            | Cs <sub>2</sub> CO <sub>3</sub> | 68                                  | 86:14           |
| 16    | PhCl               | Cs <sub>2</sub> CO <sub>3</sub> | 66                                  | 88:12           |

<sup>a</sup>Yield of isolated product **22** after chromatography, <sup>b</sup>The er value was determined by HPLC analysis of the purified product on a chiral stationary phase.

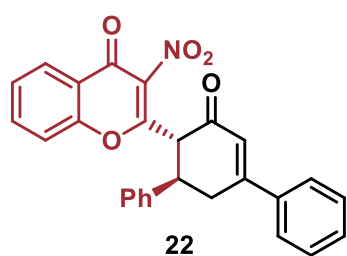

**3-Nitro-2-((3'R,4'R)-5'-oxo-2',3',4',5'-tetrahydro-[1,1':3',1''-terphenyl]-4'-yl)-4H-chromen-4-one (22)**

Yield: 58.8 mg, 65%, yellow foam; **HPLC**: CHIRALPAK AS; *n*-heptane/EtOH = 7/3; flow rate 0.7 mL/min; T = 30 °C; retention time: 14.42 min (major), 29.39 min (minor), e.r.: 94.5:5.5.

<sup>1</sup>H NMR (400 MHz, CDCl<sub>3</sub>) δ 8.19 (d, *J* = 8.0 Hz, 1H), 7.76 – 7.70 (m, 1H), 7.61 (d, *J* = 6.9 Hz, 2H), 7.52-7.42 (m, 5H), 7.35-7.27 (m, 5H), 6.69 (s, 1H), 4.62 (d, *J* = 12.8 Hz, 1H), 4.14-4.03 (m, 4.8 Hz, 1H), 3.32 – 3.15 (m, 2H) ppm; <sup>13</sup>C NMR (150 MHz, CDCl<sub>3</sub>) δ 191.9, 167.9, 162.6, 159.3, 155.0, 141.5, 139.5, 137.3, 135.0, 130.9, 129.3 (2C), 129.1 (2C), 128.3, 126.9 (2C), 126.6, 126.4, 126.3 (2C), 123.9, 123.5, 117.9, 55.4, 44.5, 36.9 ppm; **IR (ATR)**: 2925, 2326, 1666, 1614, 1527,

1459, 1372, 1245, 1208, 1135, 1031, 894, 759, 693  $\text{cm}^{-1}$ ; **HRMS (ESI):**  $m/z$   $[\text{M}+\text{Na}]^+$  calcd for  $\text{C}_{27}\text{H}_{19}\text{NO}_5\text{Na}^+$ : 460.1155; found 460.1147.

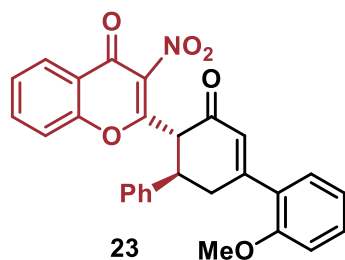

**2-((3'R,4'R)-2-Methoxy-5'-oxo-2',3',4',5'-tetrahydro-[1,1':3',1''-terphenyl]-4'-yl)-3-nitro-4H-chromen-4-one (23)**

Yield: 58.0 mg, 62%, yellow foam; **HPLC:** CHIRALPAK IB; *n*-heptane/EtOH = 8/2; flow rate 0.7 mL/min; T= 30 °C; retention time: 17.21 min (minor), 20.60 min (major), 95:5 e.r.;  **$^1\text{H}$  NMR (400 MHz,  $\text{CDCl}_3$ )**  $\delta$  8.16 (d,  $J$  = 7.8 Hz, 1H), 7.75 – 7.71 (m, 1H), 7.52-7.38 (m, 3H), 7.36 – 7.16 (m, 6H), 7.08 – 6.94 (m, 2H), 6.49 (s, 1H), 4.62 (d,  $J$  = 13.0 Hz, 1H), 4.10 – 4.04 (m, 1H), 3.89 (s, 3H), 3.35 – 3.11 (m, 2H) ppm;  **$^{13}\text{C}$  NMR (150 MHz,  $\text{CDCl}_3$ )**  $\delta$  192.0, 167.9, 162.8, 161.0, 156.7, 155.0, 141.5, 139.7, 134.9, 131.2, 129.1 (2C), 128.9, 128.0 (2C), 126.9 (2C), 126.8, 126.5, 126.3, 123.5, 120.9, 117.9, 111.3, 55.7, 55.5, 45.0, 38.5 ppm; **IR (ATR):** 2924, 2328, 1656, 1606, 1532, 1459, 1369, 1295, 1235, 1128, 1028, 891, 755, 697  $\text{cm}^{-1}$ ; **HRMS (ESI):**  $m/z$   $[\text{M}+\text{Na}]^+$  calcd for  $\text{C}_{28}\text{H}_{21}\text{NO}_6\text{Na}^+$ : 490.1261; found 490.1245.

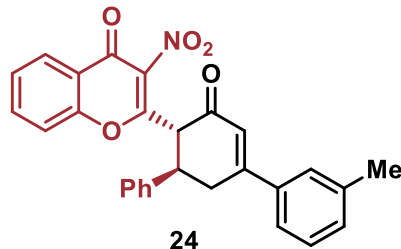

**2-((3'R,4'R)-3-Methyl-5'-oxo-2',3',4',5'-tetrahydro-[1,1':3',1''-terphenyl]-4'-yl)-3-nitro-4H-chromen-4-one (24)**

Yield: 54.1 mg, 60%, yellow foam; **HPLC:** CHIRALPAK AS; *n*-heptane/EtOH = 7/3; flow rate 0.7 mL/min; T= 30 °C; retention time: 11.94 min (major), 21.87 min (minor), e.r.: 90.5:9.5;  **$^1\text{H}$  NMR (400 MHz,  $\text{CDCl}_3$ )**  $\delta$  8.16 – 8.10 (m, 1H), 7.71 – 7.64 (m, 1H), 7.46 – 7.15 (m, 11H), 6.63 (d,  $J$  = 1.7 Hz, 1H), 4.57 (d,  $J$  = 13.1 Hz, 1H), 4.09 – 3.99 (m, 1H), 3.29 – 3.07 (m, 2H), 2.38 (s, 3H) ppm;  **$^{13}\text{C}$  NMR (100 MHz,  $\text{CDCl}_3$ )**  $\delta$  191.8, 167.9, 162.6, 159.5, 155.0, 141.5, 139.5, 138.7, 137.2, 134.9, 131.7, 129.3 (2C), 128.9, 128.2, 126.9, 126.9 (2C), 126.5, 126.4, 123.7, 123.4, 123.4, 55.3, 44.5, 36.9, 21.4 ppm; **IR (ATR):** 2917, 2326, 1671, 1614, 1520, 1461, 1366, 1218, 1142, 1090, 1023, 892, 850, 758, 691  $\text{cm}^{-1}$ ; **HRMS (ESI):**  $m/z$   $[\text{M}+\text{Na}]^+$  calcd for  $\text{C}_{28}\text{H}_{21}\text{NO}_5\text{Na}^+$ : 474.1312; found 474.1300.

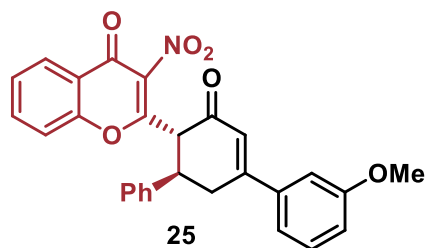

**2-((3'R,4'R)-3-Methoxy-5'-oxo-2',3',4',5'-tetrahydro-[1,1':3',1''-terphenyl]-4'-yl)-3-nitro-4H-chromen-4-one (25)**

Yield: 53.9 mg, 58%, yellow foam; **HPLC**: CHIRALPA1K AS; *n*-heptane/EtOH = 7/3; flow rate 0.7 mL/min; T= 30 °C; retention time: 14.80 min (major), 27.72 min (minor), e.r.: 93:7; **<sup>1</sup>H NMR (600 MHz, CDCl<sub>3</sub>)** δ 8.15 (dd, *J* = 8.0, 1.5 Hz, 1H), 7.71 - 7.67 (m, 1H), 7.56 (d, *J* = 8.9 Hz, 2H), 7.45 - 7.38 (m, 2H), 7.30 - 7.26 (m, 4H), 7.24 - 7.19 (m, 1H), 6.95 (d, *J* = 8.9 Hz, 2H), 6.62 (d, *J* = 2.3 Hz, 1H), 4.56 (d, *J* = 13.1 Hz, 1H), 4.06 - 4.00 (m, 1H), 3.86 (s, 3H), 3.24 (dd, *J* = 18.1, 4.4 Hz, 1H), 3.15 - 3.12 (m, 1H) ppm; **<sup>13</sup>C NMR (100 MHz, CDCl<sub>3</sub>)** δ 191.8, 167.9, 162.5, 160.0, 159.2, 155.0, 141.5, 139.4, 138.7, 134.9, 130.0, 129.3 (2C), 128.2, 126.9 (2C), 126.5, 126.4, 124.0, 123.5, 118.7, 117.8, 116.4, 111.8, 55.4, 55.4, 44.4, 36.9 ppm; **IR (ATR)**: 2923, 2324, 1741, 1657, 1607, 1526, 1460, 1526, 1460, 1368, 1264, 1207, 1136, 1094, 1035, 891, 846, 761, 695 cm<sup>-1</sup>; **HRMS (ESI)**: *m/z* [M+Na]<sup>+</sup> calcd for C<sub>28</sub>H<sub>21</sub>NO<sub>6</sub>Na<sup>+</sup>: 490.1261; found 490.1254.

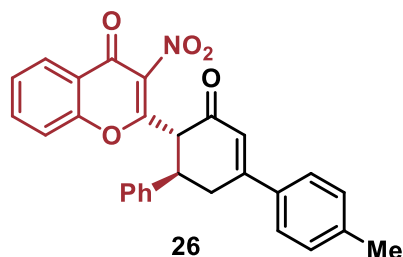

**2-((3'R,4'R)-4-Methyl-5'-oxo-2',3',4',5'-tetrahydro-[1,1':3',1''-terphenyl]-4'-yl)-3-nitro-4H-chromen-4-one (26)**

Yield: 63.2 mg, 70%, yellow foam; **HPLC**: CHIRALPA1K AS; *n*-heptane/EtOH = 7/3; flow rate 0.7 mL/min; T= 30 °C; retention time: 12.42 min (major), 23.95 min (minor), e.r.: 90.5:9.5; **<sup>1</sup>H NMR (400 MHz, CDCl<sub>3</sub>)** δ 8.16 - 8.10 (m, 1H), 7.71 - 7.65 (m, 1H), 7.50 - 7.36 (m, 4H), 7.31 - 7.16 (m, 7H), 6.63 (d, *J* = 1.8 Hz, 1H), 4.56 (d, *J* = 13.1 Hz, 1H), 4.08 - 3.99 (m, 1H), 3.27 - 3.08 (m, 2H), 2.38 (s, 3H) ppm; **<sup>13</sup>C NMR (100 MHz, CDCl<sub>3</sub>)** δ 191.8, 167.9, 162.6, 159.2, 155.0, 141.5, 141.5, 139.5, 134.9, 134.2, 129.7 (2C), 129.2 (2C), 128.2, 126.9 (2C), 126.5, 126.3, 126.2 (2C), 123.5, 123.0, 117.8, 55.3, 44.4, 36.7, 21.4 ppm; **IR (ATR)**: 2920, 2323, 1665, 1603, 1527, 1460, 1367, 1247, 1138, 1024, 893, 809, 758, 695 cm<sup>-1</sup>; **HRMS (ESI)**: *m/z* [M+Na]<sup>+</sup> calcd for C<sub>28</sub>H<sub>21</sub>NO<sub>5</sub>Na<sup>+</sup>: 474.1312; found 474.1298.

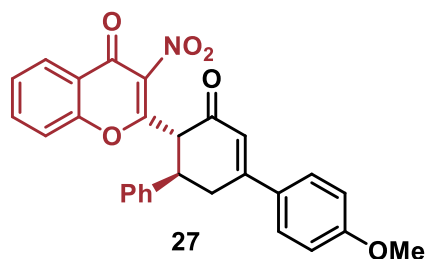

**2-((3'R,4'R)-4-Methoxy-5'-oxo-2',3',4',5'-tetrahydro-[1,1':3',1''-terphenyl]-4'-yl)-3-nitro-4H-chromen-4-one (27)**

Yield: 42.0 mg, 45% yield, yellow foam; **HPLC**: CHIRALPA1K AS; *n*-heptane/EtOH = 7/3; flow rate 0.7 mL/min; T= 30 °C; retention time: 17.80 min (major), 33.00 min (minor), e.r.: 88.5:11.5; **<sup>1</sup>H NMR (400 MHz, CDCl<sub>3</sub>)** δ 8.17 – 8.11 (m, 1H), 7.72 – 7.64 (m, 1H), 7.55 (d, *J* = 8.9 Hz, 2H), 7.43 – 7.37 (m, 2H), 7.29 – 7.18 (m, 5H), 6.93 (d, *J* = 8.9 Hz, 2H), 6.61 (d, *J* = 2.0 Hz, 1H), 4.55 (d, *J* = 13.1 Hz, 1H), 4.07 – 3.96 (m, 1H), 3.84 (s, 3H), 3.23 (dd, *J* = 18.1, 4.5 Hz, 1H), 3.15 – 3.06 (m, 1H) ppm; **<sup>13</sup>C NMR (150 MHz, CDCl<sub>3</sub>)** δ 191.7, 167.9, 162.7, 162.0, 158.5, 155.0, 141.5, 139.6, 134.9, 129.2 (2C), 129.2, 128.1, 128.0 (2C), 126.9 (2C), 126.6, 126.3, 123.5, 121.9, 117.8, 114.4 (2C), 55.4, 55.2, 44.4, 36.6 ppm; **IR (ATR)**: 2925, 2301, 1741, 1662, 1596, 1520, 1459, 1366, 1236, 1184, 1027, 893, 823, 761, 694 cm<sup>-1</sup>; **HRMS (ESI)**: *m/z* [M+Na]<sup>+</sup> calcd for C<sub>28</sub>H<sub>21</sub>NO<sub>6</sub>Na<sup>+</sup>: 490.1261; found 490.1255.

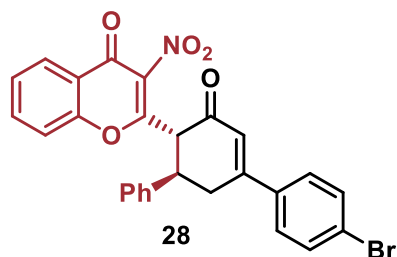

**2-((3'R,4'R)-4-Bromo-5'-oxo-2',3',4',5'-tetrahydro-[1,1':3',1''-terphenyl]-4'-yl)-3-nitro-4H-chromen-4-one (28)**

Yield: 43.3 mg, 42% yield, yellow foam; **HPLC**: CHIRALPA1K AS; *n*-heptane/EtOH = 7/3; flow rate 0.7 mL/min; T= 30 °C; retention time: 14.37 min (major), 22.88 min (minor), e.r.: 89.5:10.5; **<sup>1</sup>H NMR (600 MHz, CDCl<sub>3</sub>)** δ 8.16 (d, *J* = 8.0 Hz, 1H), 7.72 – 7.67 (m, 1H), 7.58 (d, *J* = 8.4 Hz, 2H), 7.48 – 7.39 (m, 4H), 7.31 – 7.25 (m, 4H), 7.23 – 7.19 (m, 1H), 6.63 (s, 1H), 4.58 (d, *J* = 13.2 Hz, 1H), 4.08 – 4.02 (m, 1H), 3.21 – 3.12 (m, 2H) ppm; **<sup>13</sup>C NMR (150 MHz, CDCl<sub>3</sub>)** δ 191.7, 167.9, 162.3, 157.8, 154.9, 141.4, 139.2, 136.1, 135.0, 132.3 (2C), 129.3 (2C), 128.3, 127.7 (2C), 126.8 (2C), 126.6, 126.4, 125.5, 124.1, 123.5, 117.8, 55.3, 44.3, 36.7 ppm; **IR (ATR)**: 2921, 2086, 1740, 1663, 1609, 1525, 1459, 1373, 1216, 1138, 1072, 1006, 892, 809, 754, 688 cm<sup>-1</sup>; **HRMS (ESI)**: *m/z* [M+Na]<sup>+</sup> calcd for C<sub>27</sub>H<sub>18</sub>NO<sub>5</sub>BrNa<sup>+</sup>: 538.0261; found 538.0258.

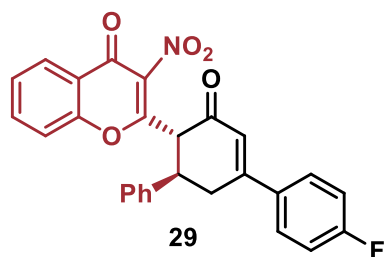

**2-((3'R,4'R)-4-Fluoro-5'-oxo-2',3',4',5'-tetrahydro-[1,1':3',1''-terphenyl]-4'-yl)-3-nitro-4H-chromen-4-one (29)**

Yield: 39.1 mg, 43% yield, yellow foam; **HPLC**: CHIRALPA1K AS; *n*-heptane/EtOH = 7/3; flow rate 0.7 mL/min; T= 30 °C; retention time: 14.47 min (major), 30.29 min (minor), e.r.: 89.5:10.5; **<sup>1</sup>H NMR (600 MHz, CDCl<sub>3</sub>)** δ 8.16 (dd, *J* = 8.2, 1.6 Hz, 1H), 7.72 - 7.68 (m, 1H), 7.61 - 7.55 (m, 2H), 7.45 - 7.40 (m, 2H), 7.31 - 7.25 (m, 4H), 7.23 - 7.19 (m, 1H), 7.16 - 7.12 (m, 2H), 6.61 (d, *J* = 1.9 Hz, 1H), 4.58 (d, *J* = 13.2 Hz, 1H), 4.00 - 4.01 (m, 1H), 3.24 - 3.11 (m, 2H); **<sup>13</sup>C NMR (150 MHz, CDCl<sub>3</sub>)** δ 191.7, 167.9, 165.1, 163.5, 162.4, 157.9, 155.0, 141.5, 139.3, 135.0, 133.3 (d, *J* = 3.0 Hz), 129.3 (2C), 128.4, 128.3, 128.3, 126.8 (2C), 126.6, 126.4, 123.5, 123.7, 117.8, 116.2 (d, *J* = 21.0 Hz), 55.2, 44.4, 36.9 ppm; **IR (ATR)**: 2922, 2322, 1739, 1667, 1599, 1523, 1460, 1366, 1227, 1155, 1092, 1018, 967, 897, 831, 798, 758, 697 cm<sup>-1</sup>; **HRMS (ESI)**: *m/z* [M+Na]<sup>+</sup> calcd for C<sub>27</sub>H<sub>18</sub>NO<sub>5</sub>FNa<sup>+</sup>: 478.1061; found 478.1053.

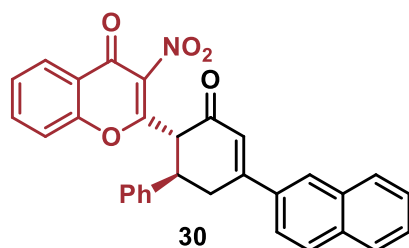

**2-((1R,2R)-5-(Naphthalen-2-yl)-3-oxo-1,2,3,6-tetrahydro-[1,1'-biphenyl]-2-yl)-3-nitro-4H-chromen-4-one (30)**

Yield: 58.0 mg, 60% yield, yellow foam; **HPLC**: CHIRALPA1K AS; *n*-heptane/EtOH = 7/3; flow rate 0.7 mL/min; T= 30 °C; retention time: 14.19 min (major), 20.70 min (minor), e.r.: 94:6; **<sup>1</sup>H NMR (600 MHz, CDCl<sub>3</sub>)** δ 8.15 (dd, *J* = 8.0, 1.6 Hz, 1H), 8.06 - 8.03 (m, 1H), 7.92 - 7.82 (m, 3H), 7.73 - 7.67 (m, 2H), 7.59 - 7.52 (m, 2H), 7.47 - 7.39 (m, 2H), 7.35 - 7.28 (m, 4H), 7.25 - 7.22 (m, 1H), 6.81 (d, *J* = 2.3 Hz, 1H), 4.64 (d, *J* = 13.2 Hz, 1H), 4.15 - 4.09 (m, 1H), 3.40 (dd, *J* = 18.1, 4.4 Hz, 1H), 3.30 - 3.24 (m, 1H) ppm; **<sup>13</sup>C NMR (150 MHz, CDCl<sub>3</sub>)** δ 191.9, 167.9, 162.6, 158.8, 155.0, 141.5, 139.5, 135.0, 134.3, 134.3, 133.0, 129.3 (2C), 128.9, 128.8, 128.3, 127.8, 127.7, 127.0, 126.9 (2C), 126.8, 126.6, 126.4, 124.0, 123.5, 123.0, 117.9, 55.4, 44.5, 36.8 ppm; **IR (ATR)**: 2924, 2288, 1741, 1663, 1603, 1524, 1459, 1372, 1276, 1230, 1135, 1024, 894, 846, 800, 757, 695 cm<sup>-1</sup>; **HRMS (ESI)**: *m/z* [M+Na]<sup>+</sup> calcd for C<sub>31</sub>H<sub>21</sub>NO<sub>5</sub>Na<sup>+</sup>: 510.1312; found 510.1305.

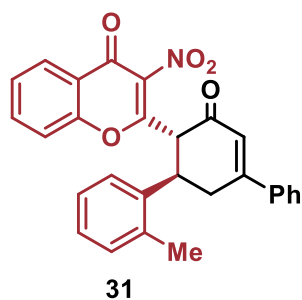

**2-((3'R,4'R)-2''-Methyl-5'-oxo-2',3',4',5'-tetrahydro-[1,1':3',1''-terphenyl]-4'-yl)-3-nitro-4H-chromen-4-one (31)**

Yield: 49.8 mg, 55% yield, yellow foam; **HPLC**: CHIRALPA1K AS; *n*-heptane/EtOH = 7/3; flow rate 0.7 mL/min; T= 30 °C; retention time: 11.70 min (major), 27.47 min (minor), e.r.: 93:7; **<sup>1</sup>H NMR (400 MHz, CDCl<sub>3</sub>)** δ 8.13 (dd, *J* = 7.9, 1.5 Hz, 1H), 7.71 – 7.64 (m, 1H), 7.58 – 7.54 (m, 2H), 7.46 – 7.35 (m, 6H), 7.23 – 7.19 (m, 1H), 7.11 – 7.02 (m, 2H), 6.65 (d, *J* = 2.2 Hz, 1H), 4.71 (d, *J* = 13.2 Hz, 1H), 4.41 – 4.32 (m, 1H), 3.18 – 3.00 (m, 2H), 2.38 (s, 3H) ppm; **<sup>13</sup>C NMR (100 MHz, CDCl<sub>3</sub>)** δ 192.2, 167.8, 162.6, 159.1, 154.9, 141.5, 137.5, 137.2, 135.0, 134.9, 131.0, 130.9, 129.0 (2C), 127.7, 127.2, 126.6, 126.4, 126.2 (2C), 125.6, 123.7, 123.5, 117.7, 54.7, 38.9, 36.7, 19.4 ppm; **IR (ATR)**: 2929, 2100, 1734, 1663, 1616, 1525, 1461, 1367, 1213, 1138, 1100, 1026, 894, 757, 693 cm<sup>-1</sup>; **HRMS (ESI)**: *m/z* [M+H]<sup>+</sup> calcd for C<sub>28</sub>H<sub>22</sub>NO<sub>5</sub><sup>+</sup>: 452.1493; found 452.1495.

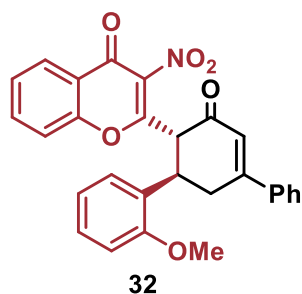

**2-((3'R,4'R)-2''-Methoxy-5'-oxo-2',3',4',5'-tetrahydro-[1,1':3',1''-terphenyl]-4'-yl)-3-nitro-4H-chromen-4-one (32)**

Yield: 56.0 mg, 60% yield, yellow foam; **HPLC**: CHIRALPA1K AS; *n*-heptane/EtOH = 7/3; flow rate 0.7 mL/min; T= 30 °C; retention time: 11.99 min (major), 17.32 min (minor), e.r.: 95:5; **<sup>1</sup>H NMR (400 MHz, CDCl<sub>3</sub>)** δ 8.17 (d, *J* = 7.8 Hz, 1H), 7.74 – 7.70 (m, 1H), 7.64-7.59 (m, 2H), 7.50 - 7.40 (m, 5H), 7.24 – 7.10 (m, 2H), 6.90 – 6.75 (m, 2H), 6.67 (s, 1H), 5.13 (d, *J* = 12.7 Hz, 1H), 4.21 (d, *J* = 9.7 Hz, 1H), 3.83 (s, 3H), 3.66 – 3.52 (m, 1H), 3.11 (d, *J* = 18.0 Hz, 1H) ppm; **<sup>13</sup>C NMR (150 MHz, CDCl<sub>3</sub>)** δ 193.0, 168.1, 163.5, 160.4, 157.6, 155.1, 141.5, 137.7, 134.8, 130.7, 129.5, 129.0 (2C), 126.5, 126.5, 126.3 (2C), 126.2, 123.8, 123.5, 121.0, 117.9, 111.3, 54.9 (2C), 53.3, 33.8 ppm; **IR (ATR)**: 2925, 2326, 1740, 1661, 1612, 1524, 1459, 1366, 1236, 1136, 1017, 879, 795, 753, 694 cm<sup>-1</sup>; **HRMS (ESI)**: *m/z* [M+K]<sup>+</sup> calcd for C<sub>28</sub>H<sub>21</sub>NO<sub>6</sub>K<sup>+</sup>: 506.1001; found 506.0997.

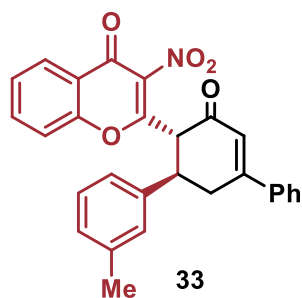

**2-((3'*R*,4'*R*)-3''-Methyl-5'-oxo-2',3',4',5'-tetrahydro-[1,1':3',1''-terphenyl]-4'-yl)-3-nitro-4H-chromen-4-one (33)**

Yield: 63.1 mg, 45% yield, yellow foam; **HPLC**: CHIRALPA1K AS; *n*-heptane/EtOH = 7/3; flow rate 0.7 mL/min; T= 30 °C; retention time: 11.92 min (major), 19.53 min (minor), e.r.: 95:5; **<sup>1</sup>H NMR (600 MHz, CDCl<sub>3</sub>)** δ 8.15 (dd, *J* = 8.0, 1.6 Hz, 1H), 7.72 – 7.68 (m, 1H), 7.59 – 7.56 (m, 2H), 7.48 – 7.40 (m, 5H), 7.15 – 7.09 (m, 2H), 7.03 (dd, *J* = 19.9, 7.6 Hz, 2H), 6.65 (d, *J* = 2.2 Hz, 1H), 4.59 (d, *J* = 13.2 Hz, 1H), 4.05 – 3.99 (m, 1H), 3.26 – 3.14 (m, 2H), 2.26 (s, 3H) ppm; **<sup>13</sup>C NMR (150 MHz, CDCl<sub>3</sub>)** δ 192.0, 167.9, 162.7, 159.4, 155.0, 141.5, 139.4, 139.1, 137.3, 134.9, 130.9, 129.1, 129.0, 129.0 (2C), 127.4, 126.5, 126.4, 126.3 (2C), 124.1, 123.8, 123.5, 117.9, 55.3, 44.4, 37.0, 21.4 ppm; **IR (ATR)**: 2928, 2086, 1740, 1664, 1611, 1528, 1461, 1375, 1210, 1138, 1041, 964, 884, 763, 693 cm<sup>-1</sup>; **HRMS (ESI)**: *m/z* [M+K]<sup>+</sup> calcd for C<sub>28</sub>H<sub>21</sub>NO<sub>5</sub>K<sup>+</sup>: 490.1051; found 490.1035.

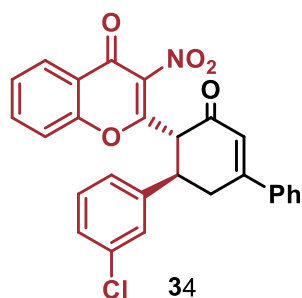

**2-((3'*R*,4'*R*)-3''-Chloro-5'-oxo-2',3',4',5'-tetrahydro-[1,1':3',1''-terphenyl]-4'-yl)-3-nitro-4H-chromen-4-one (34)**

Yield: 47.4 mg, 50% yield, yellow foam; **HPLC**: CHIRALPA1K AS; *n*-heptane/EtOH = 7/3; flow rate 0.7 mL/min; T= 30 °C; retention time: 14.97 min (major), 26.42 min (minor), e.r.: 93.5:6.5; **<sup>1</sup>H NMR (600 MHz, CDCl<sub>3</sub>)** δ 8.19 (dd, *J* = 7.9, 1.3 Hz, 1H), 7.74 – 7.70 (m, 1H), 7.58 (dd, *J* = 8.0, 1.4 Hz, 2H), 7.50 – 7.41 (m, 5H), 7.33 – 7.29 (m, 1H), 7.25 – 7.17 (m, 3H), 6.66 (d, *J* = 2.2 Hz, 1H), 4.55 (d, *J* = 13.2 Hz, 1H), 4.08 – 4.01 (m, 1H), 3.27 – 3.12 (m, 2H) ppm; **<sup>13</sup>C NMR (150 MHz, CDCl<sub>3</sub>)** δ 191.4, 167.9, 162.0, 159.1, 155.0, 141.5, 141.4, 137.0, 135.1, 135.0, 131.1, 130.6, 129.1 (2C), 128.5, 127.4, 126.6, 126.5, 126.3 (2C), 124.9, 123.8, 123.5, 117.9, 54.9, 44.0, 36.7 ppm; **IR (ATR)**: 2923, 2084, 1664, 1608, 1573, 1527, 1462, 1368, 1302, 1246, 1200, 1136, 1102, 1028, 969, 907, 882, 794, 763, 691 cm<sup>-1</sup>; **HRMS (ESI)**: *m/z* [M+H]<sup>+</sup> calcd for C<sub>27</sub>H<sub>19</sub>NO<sub>5</sub>Cl<sup>+</sup>: 472.0946; found 472.0949.

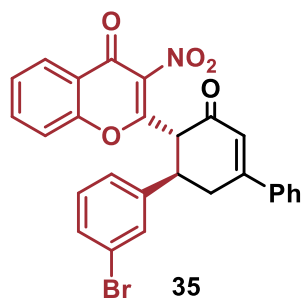

**2-((3'*R*,4'*R*)-3''-Bromo-5'-oxo-2',3',4',5'-tetrahydro-[1,1':3',1''-terphenyl]-4'-yl)-3-nitro-4H-chromen-4-one (35)**

Yield: 53.4 mg, 51% yield, yellow foam; **HPLC**: CHIRALPA1K AS; *n*-heptane/EtOH = 7/3; flow rate 0.7 mL/min; T= 30 °C; retention time: 16.14 min (major), 27.30 min (minor), e.r.: 88.5:11.5; **<sup>1</sup>H NMR (600 MHz, CDCl<sub>3</sub>)** δ 8.17 (dd, *J* = 8.2, 1.6 Hz, 1H), 7.75 – 7.70 (m, 1H), 7.59 – 7.55 (m, 2H), 7.50 – 7.42 (m, 6H), 7.35 (d, *J* = 8.1 Hz, 1H), 7.27 – 7.22 (m, 1H), 7.18 – 7.14 (m, 1H), 6.65 (d, *J* = 2.2 Hz, 1H), 4.55 (d, *J* = 13.2 Hz, 1H), 4.06 – 4.02 (m, 1H), 3.27 – 3.12 (m, 2H) ppm; **<sup>13</sup>C NMR (150 MHz, CDCl<sub>3</sub>)** δ 191.3, 167.8, 161.9, 159.1, 155.0, 141.7, 141.5, 137.0, 135.1, 131.4, 131.0, 130.9, 130.4, 129.1 (2C), 126.6, 126.5, 126.3, 125.4 (2C), 123.8, 123.5, 123.2, 117.8, 54.9, 44.0, 36.7 ppm; **IR (ATR)**: 2922, 2082, 1663, 1624, 1572, 1520, 1461, 1383, 1360, 1315, 1269, 1244, 1196, 1134, 1071, 1029, 997, 908, 882, 795, 765, 726, 690 cm<sup>-1</sup>; **HRMS (ESI)**: *m/z* [M+H]<sup>+</sup> calcd for C<sub>27</sub>H<sub>19</sub>NO<sub>5</sub>Br<sup>+</sup>: 516.0441; found 516.0443.

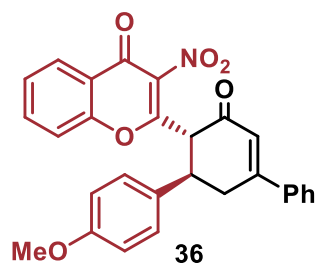

**2-((3'*R*,4'*R*)-4''-Methoxy-5'-oxo-2',3',4',5'-tetrahydro-[1,1':3',1''-terphenyl]-4'-yl)-3-nitro-4H-chromen-4-one (36)**

Yield: 49.0 mg, 52% yield, yellow foam; **HPLC**: CHIRALPA1K AS; *n*-heptane/EtOH = 7/3; flow rate 0.7 mL/min; T= 30 °C; retention time: 19.75 min (major), 38.68 min (minor), e.r.: 88:12; **<sup>1</sup>H NMR (600 MHz, CDCl<sub>3</sub>)** δ 8.16 (dd, *J* = 8.0, 1.6 Hz, 1H), 7.72 – 6.69 (m, 1H), 7.59 – 7.56 (m, 2H), 7.49 – 7.41 (m, 5H), 7.20 (d, *J* = 8.7 Hz, 2H), 6.79 (d, *J* = 8.7 Hz, 2H), 6.65 (d, *J* = 2.2 Hz, 1H), 4.54 (d, *J* = 13.2 Hz, 1H), 4.03 – 3.98 (m, 1H), 3.72 (s, 3H), 3.24 – 3.11 (m, 2H) ppm; **<sup>13</sup>C NMR (150 MHz, CDCl<sub>3</sub>)** δ 192.0, 159.4, 159.2, 155.0, 137.3, 135.0, 131.4, 130.9, 129.0, 128.0, 126.6, 126.4, 126.3, 123.9, 117.9, 114.6, 55.6, 55.2, 43.8, 37.1 ppm; **IR (ATR)**: 2916, 2108, 1665, 1605, 1518, 1462, 1360, 1308, 1251, 1183, 1135, 1106, 1061, 1032, 929, 891, 856, 825, 797, 756, 689, 660 cm<sup>-1</sup>; **HRMS (ESI)**: *m/z* [M+H]<sup>+</sup> calcd for C<sub>28</sub>H<sub>22</sub>NO<sub>6</sub><sup>+</sup>: 468.1442; found 468.1441.



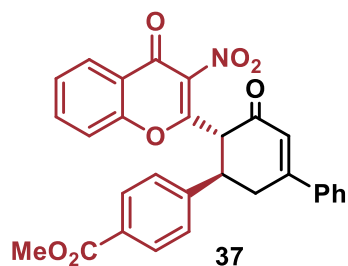

**Methyl (1'*R*,6'*R*)-6'-(3-nitro-4-oxo-4H-chromen-2-yl)-5'-oxo-1',2',5',6'-tetrahydro-[1,1':3,1''-terphenyl]-4-carboxylate (5q)**

Yield: 51.0 mg, 51% yield, yellow foam; **HPLC**: CHIRALPA1K AS; *n*-heptane/EtOH = 7/3; flow rate 0.7 mL/min; T= 30 °C; retention time: 21.48 min (major), 45.33 min (minor), e.r.: 100:0; **<sup>1</sup>H NMR (600 MHz, CDCl<sub>3</sub>)** δ 8.16 (d, *J* = 7.9 Hz, 1H), 7.95 (d, *J* = 8.3 Hz, 2H), 7.73 – 7.67 (m, 1H), 7.58 (d, *J* = 6.7 Hz, 2H), 7.50 – 7.35 (m, 7H), 6.66 (d, *J* = 1.7 Hz, 1H), 4.60 (d, *J* = 13.1 Hz, 1H), 4.17 – 4.11 (m, 1H), 3.86 (s, 3H), 3.28 – 3.14 (m, 2H) ppm; **<sup>13</sup>C NMR (150 MHz, CDCl<sub>3</sub>)** δ 191.3, 167.7, 166.3, 161.8, 159.0, 154.9, 144.4, 141.5, 137.1, 135.1, 131.0, 130.6 (2C), 130.1, 129.1 (2C), 127.1 (2C), 126.6, 126.5, 126.3 (2C), 123.9, 123.5, 117.8, 54.9, 52.2, 44.3, 36.5 ppm; **IR (ATR)**: 2923, 2085, 1718, 1662, 1609, 1576, 1529, 1462, 1374, 1279, 1248, 1198, 1106, 1024, 967, 900, 860, 796, 759, 695 cm<sup>-1</sup>; **HRMS (ESI)**: *m/z* [M+H]<sup>+</sup> calcd for C<sub>29</sub>H<sub>22</sub>NO<sub>7</sub><sup>+</sup>: 496.1391; found 496.1393.

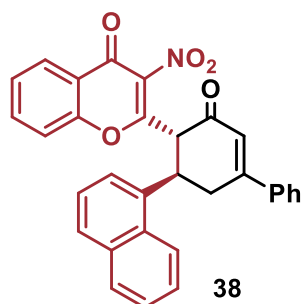

**2-((3*R*,4*R*)-3-(Naphthalen-1-yl)-5-oxo-2,3,4,5-tetrahydro-[1,1'-biphenyl]-4-yl)-3-nitro-4H-chromen-4-one (38)**

Yield: 54.0 mg, 55% yield, yellow foam; **HPLC**: CHIRALPA1K AS; *n*-heptane/EtOH = 7/3; flow rate 0.7 mL/min; T= 30 °C; retention time: 16.02 min (major), 35.01 min (minor), e.r.: 95.5:4.5; **<sup>1</sup>H NMR (600 MHz, CDCl<sub>3</sub>)** δ 8.23 (d, *J* = 8.6 Hz, 1H), 8.09 – 8.04 (m, 1H), 7.81 (d, *J* = 8.1 Hz, 1H), 7.73 (d, *J* = 8.2 Hz, 1H), 7.65 (d, *J* = 7.2 Hz, 1H), 7.58 (d, *J* = 7.1 Hz, 2H), 7.55 – 7.41 (m, 7H), 7.31 – 7.28 (m, 1H), 7.16 (d, *J* = 8.5 Hz, 1H), 6.74 (d, *J* = 2.2 Hz, 1H), 5.08 – 5.03 (m, 1H), 4.90 (d, *J* = 13.1 Hz, 1H), 3.38 (dd, *J* = 18.4, 4.2 Hz, 1H), 3.25 – 3.13 (m, 1H) ppm; **<sup>13</sup>C NMR (150 MHz, CDCl<sub>3</sub>)** δ 192.2, 167.8, 162.4, 159.3, 154.7, 141.5, 137.1, 135.7, 134.7, 134.0, 131.0, 130.7, 129.4, 129.1 (2C), 128.4, 126.6, 126.4, 126.3 (2C), 126.2, 125.9, 125.8, 123.8, 123.7, 123.4, 121.5, 117.8, 54.9, 37.5, 37.3 ppm; **IR (ATR)**: 2924, 2108, 1662, 1611, 1575, 1465, 1376, 1299, 1240, 1202, 1138, 1104, 1030, 917, 860, 782, 758, 729, 695 cm<sup>-1</sup>; **HRMS (ESI)**: *m/z* [M+H]<sup>+</sup> calcd for C<sub>31</sub>H<sub>22</sub>NO<sub>5</sub><sup>+</sup>: 488.1493; found 488.1450.

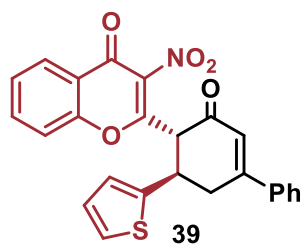

**3-Nitro-2-((3*R*,4*R*)-5-oxo-3-(thiophen-2-yl)-2,3,4,5-tetrahydro-[1,1'-biphenyl]-4-yl)-4H-chromen-4-one (39)**

Yield: 44.3 mg, 50%, yellow foam; **HPLC**: CHIRALPA1K AS; *n*-heptane/EtOH = 7/3; flow rate 0.7 mL/min; T= 30 °C; retention time: 16.21 min (major), 34.64 min (minor), e.r.: 87:13; **<sup>1</sup>H NMR (600 MHz, CDCl<sub>3</sub>)** δ 8.21 (dd, *J* = 8.0, 1.5 Hz, 1H), 7.76 – 7.72 (m, 1H), 7.59 (dd, *J* = 7.9, 1.5 Hz, 2H), 7.51 – 7.44 (m, 5H), 7.15 – 7.12 (m, 1H), 6.93 (d, *J* = 3.2 Hz, 1H), 6.86 (dd, *J* = 5.0, 3.6 Hz, 1H), 6.66 (d, *J* = 2.3 Hz, 1H), 4.47 (d, *J* = 12.9 Hz, 1H), 4.38 (td, *J* = 12.7, 12.1, 4.2 Hz, 1H), 3.39 (dd, *J* = 18.1, 4.3 Hz, 1H), 3.27 – 3.25 (m, 1H) ppm; **<sup>13</sup>C NMR (150 MHz, CDCl<sub>3</sub>)** δ 191.2, 167.9, 162.4, 159.1, 155.0, 142.5, 141.5, 137.1, 135.0, 131.0, 129.1 (2C), 127.4, 126.7, 126.5, 126.3 (2C), 124.9, 124.8, 124.1, 123.6, 118.0, 57.1, 39.4, 37.5 ppm; **IR (ATR)**: 2922, 2084, 1739, 1660, 1607, 1574, 1526, 1461, 1363, 1296, 1252, 1201, 1133, 1027, 876, 794, 758, 717, 688 cm<sup>-1</sup>; **HRMS (ESI)**: *m/z* [M+H]<sup>+</sup> calcd for C<sub>25</sub>H<sub>18</sub>NO<sub>5</sub>S<sup>+</sup>: 444.0900; found 444.0891.

## 4 NMR Spectra

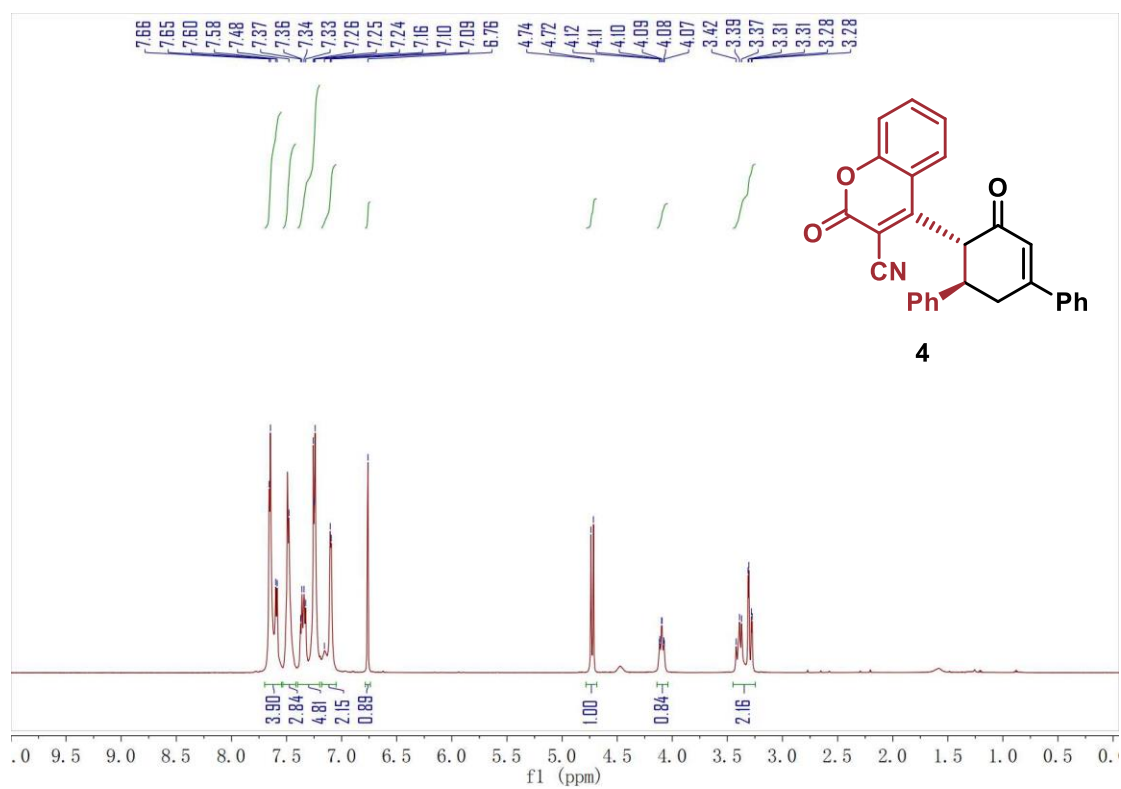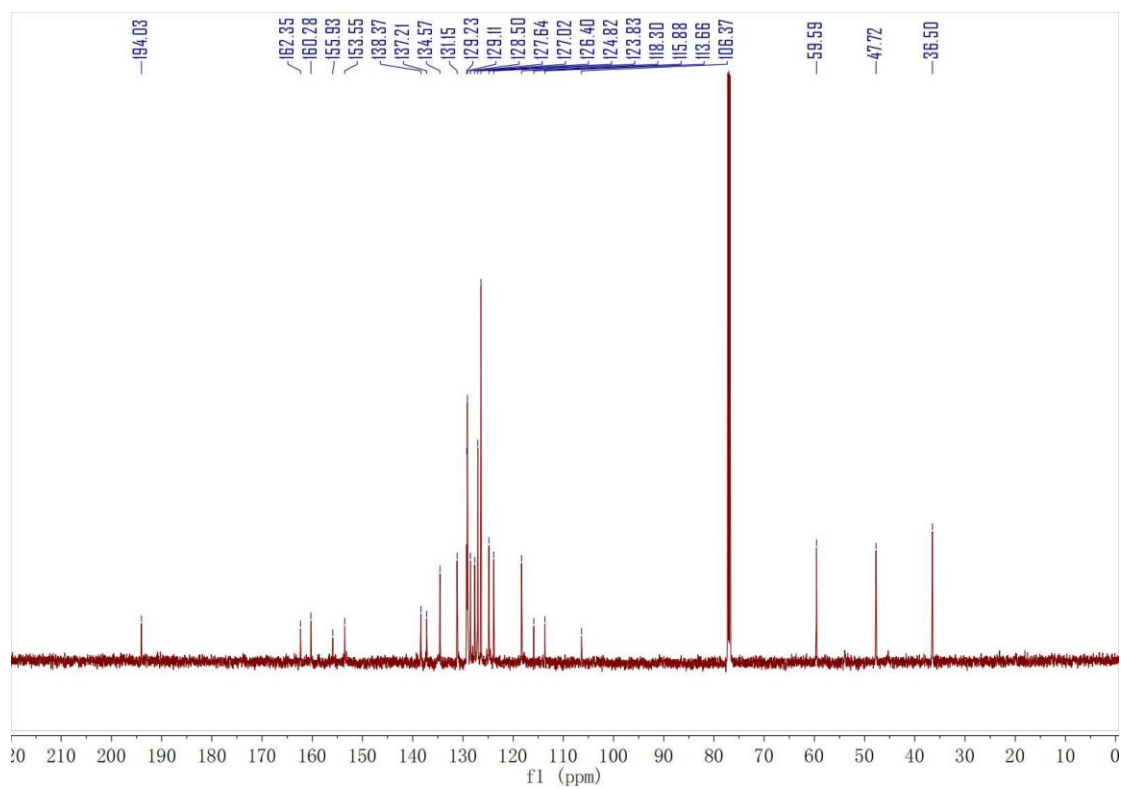

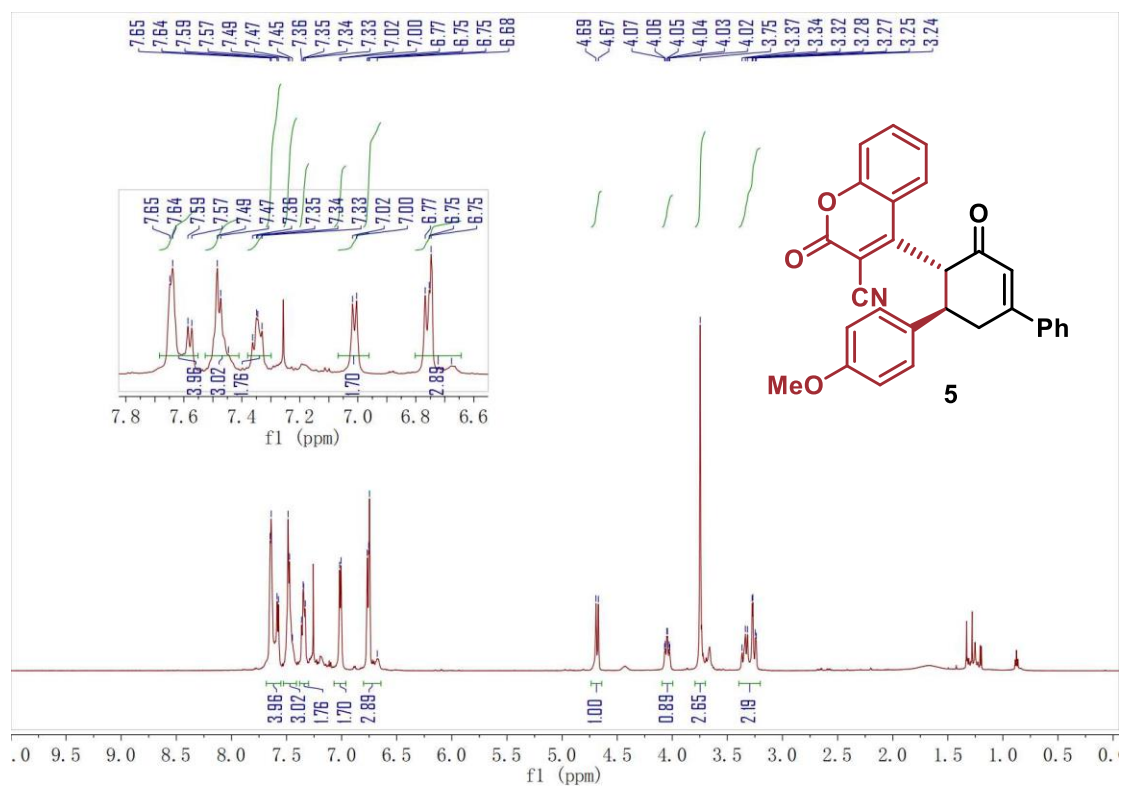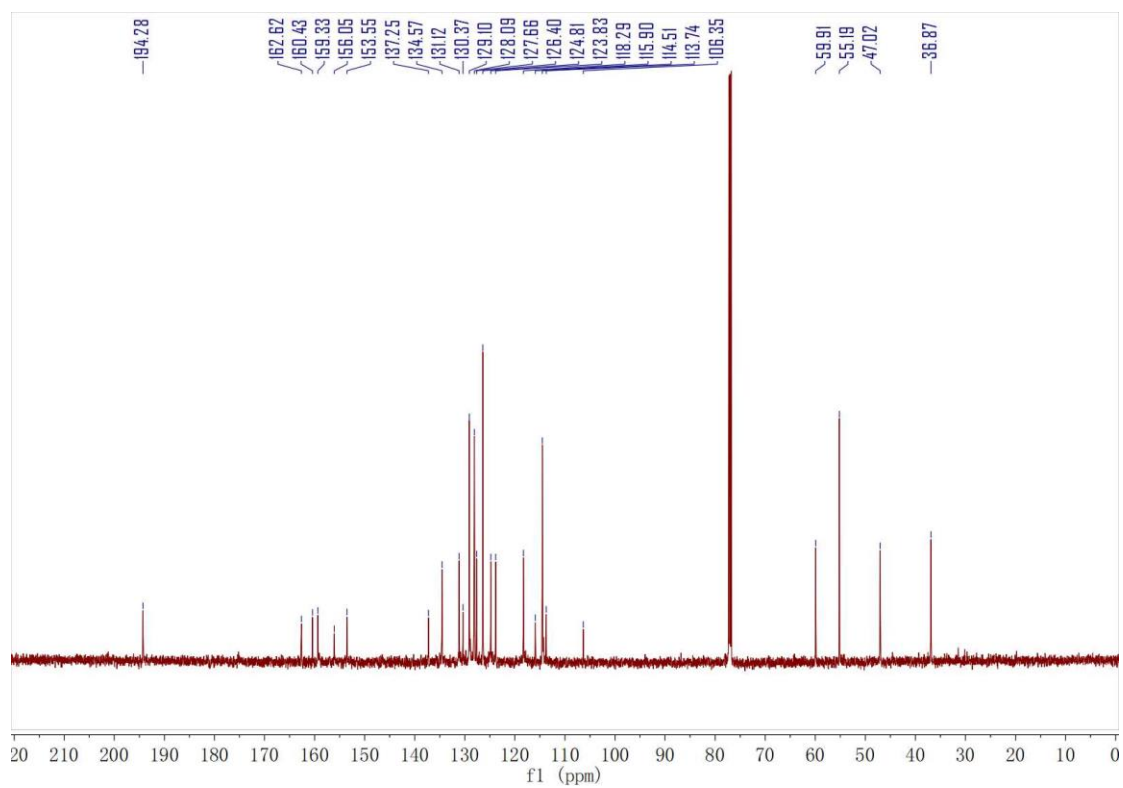

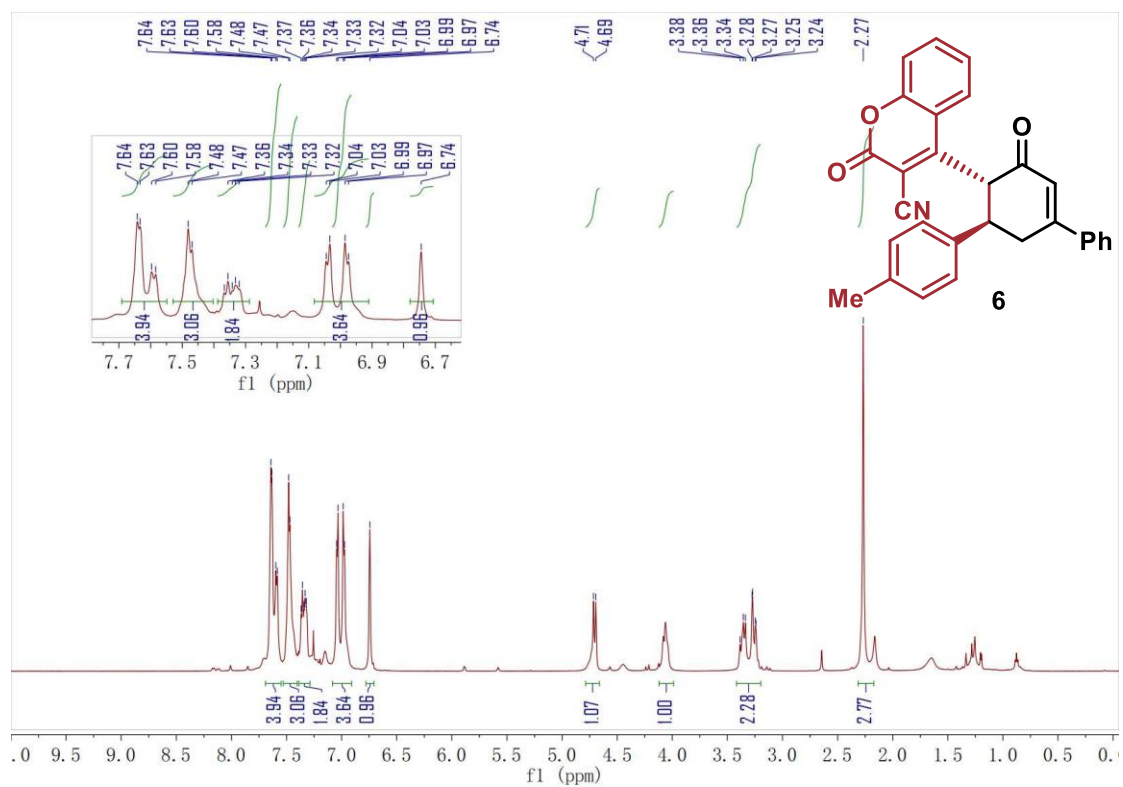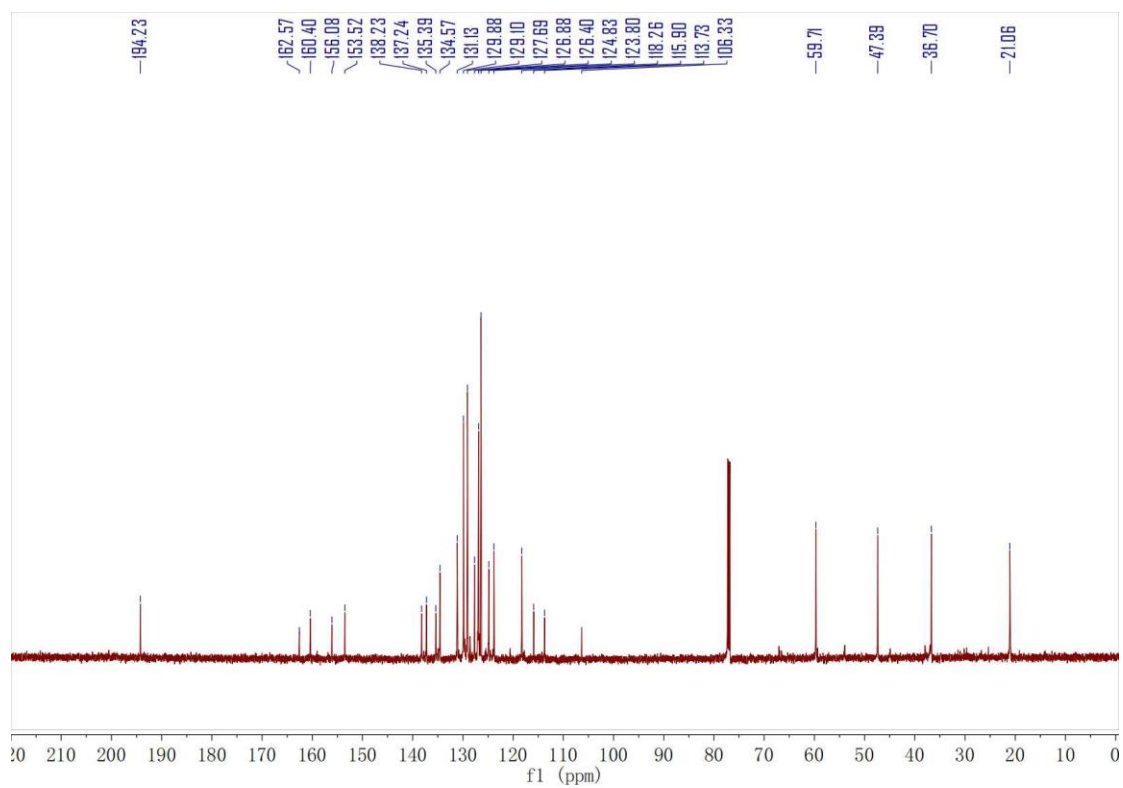

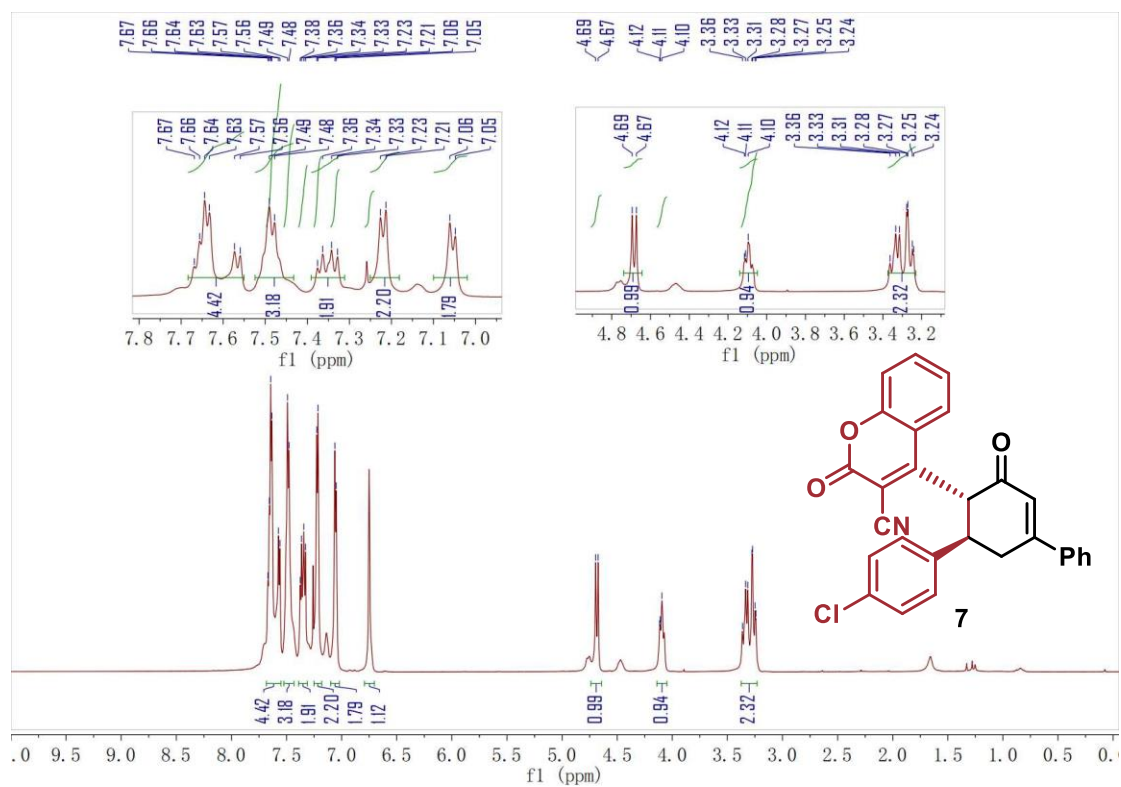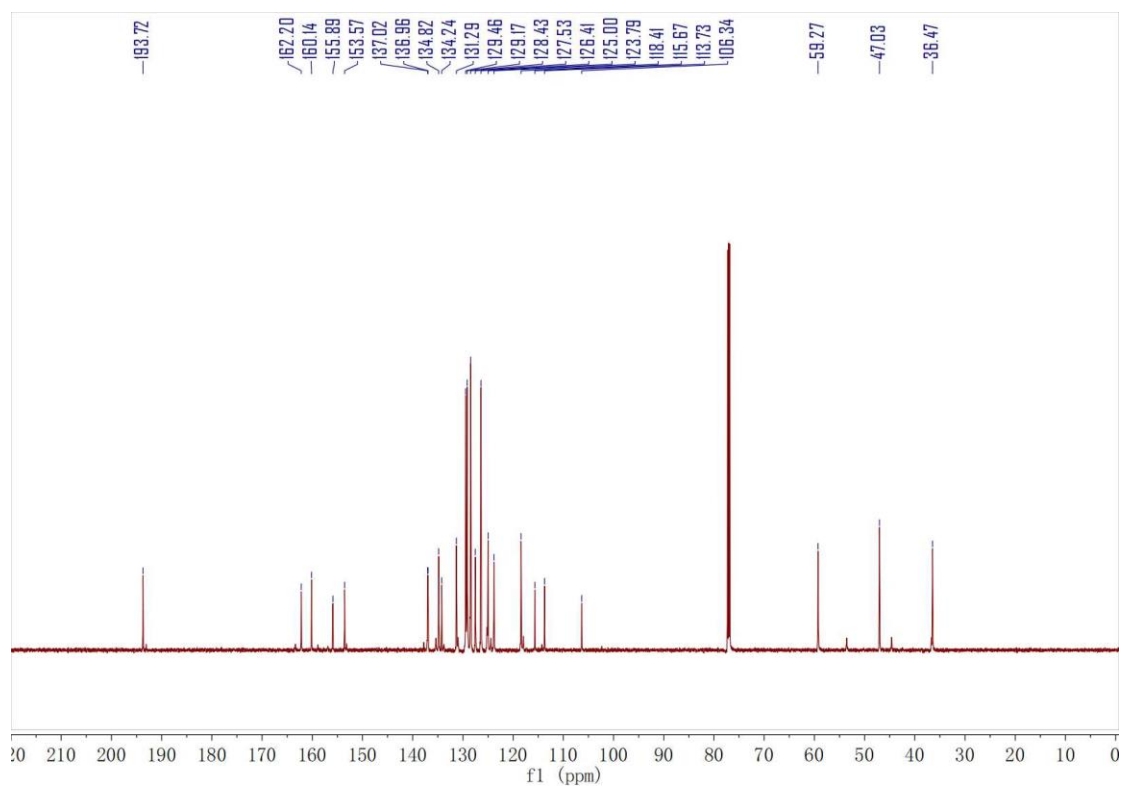

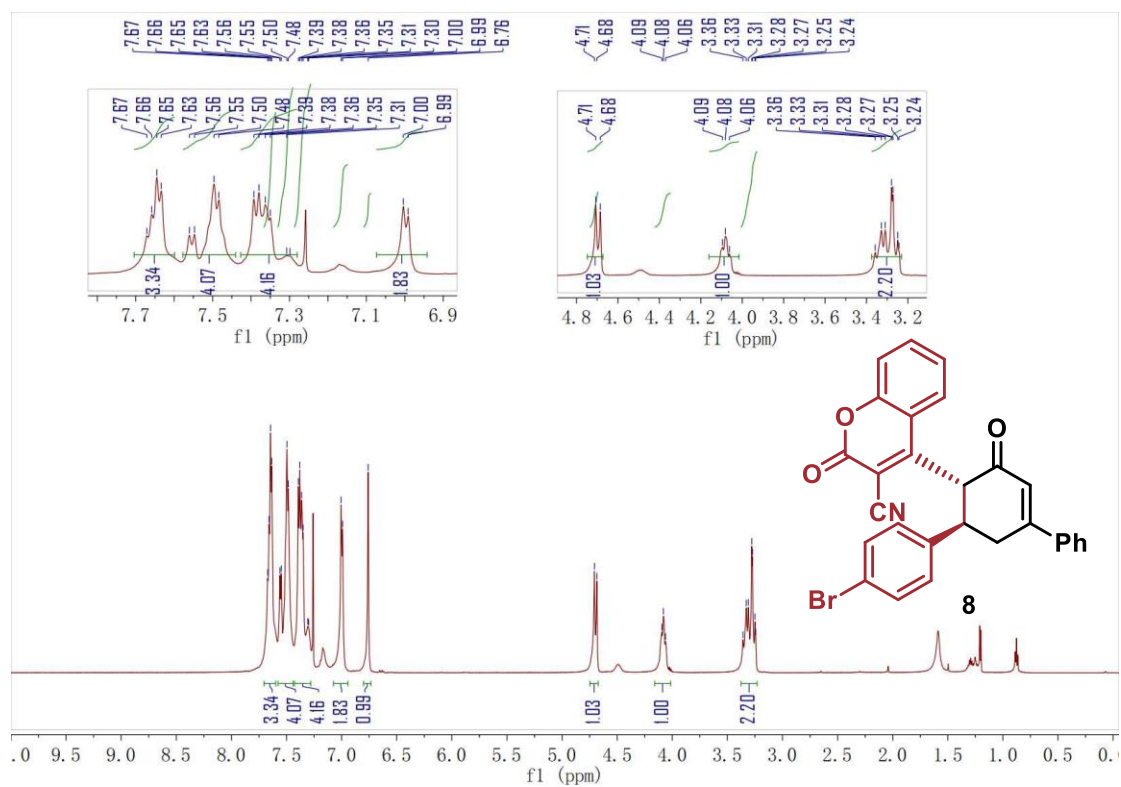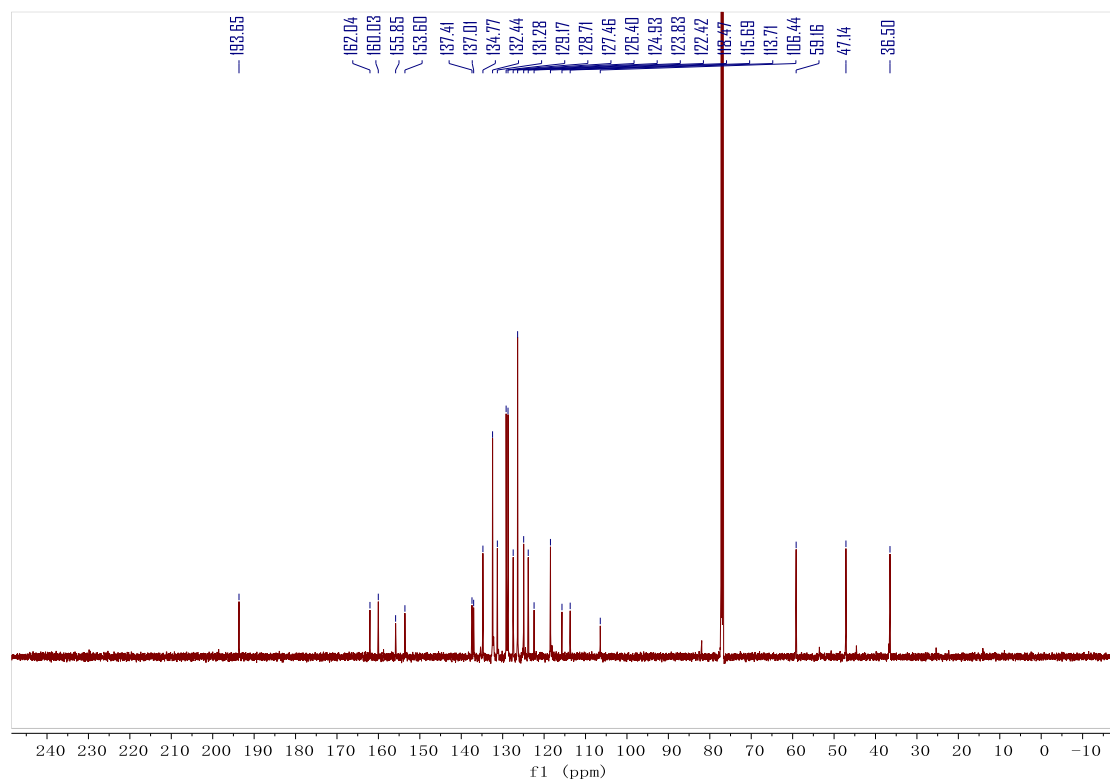

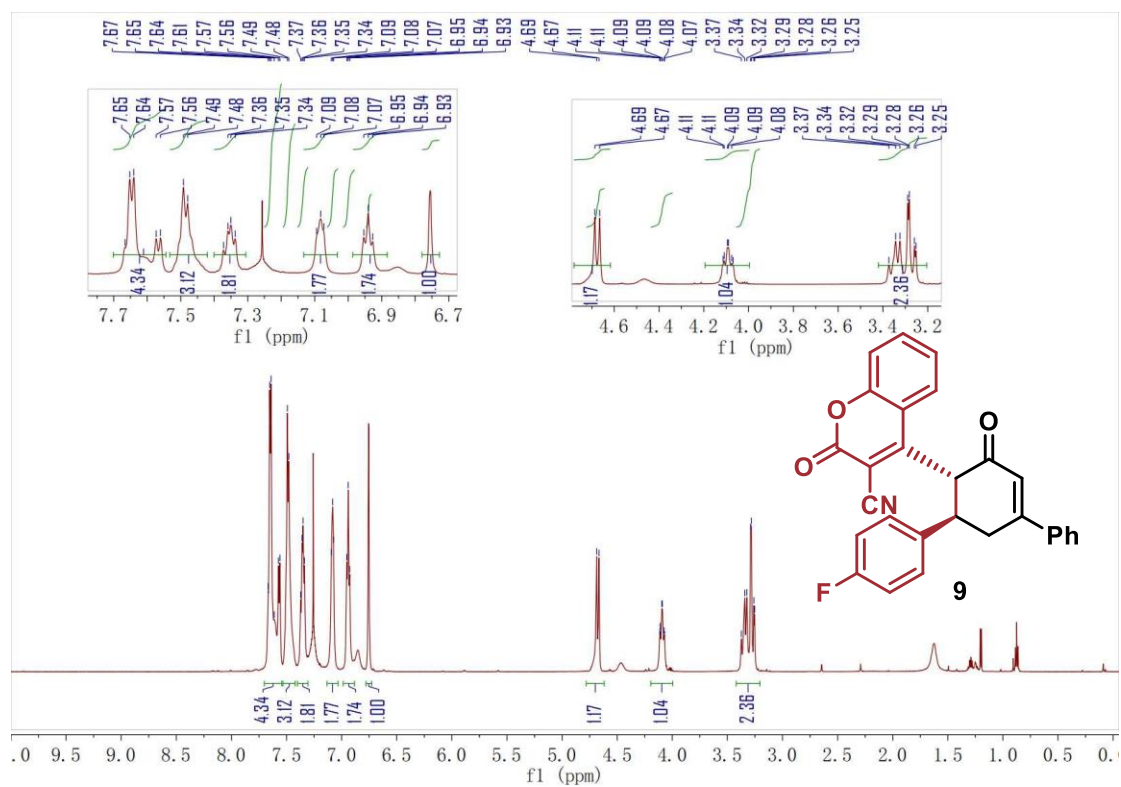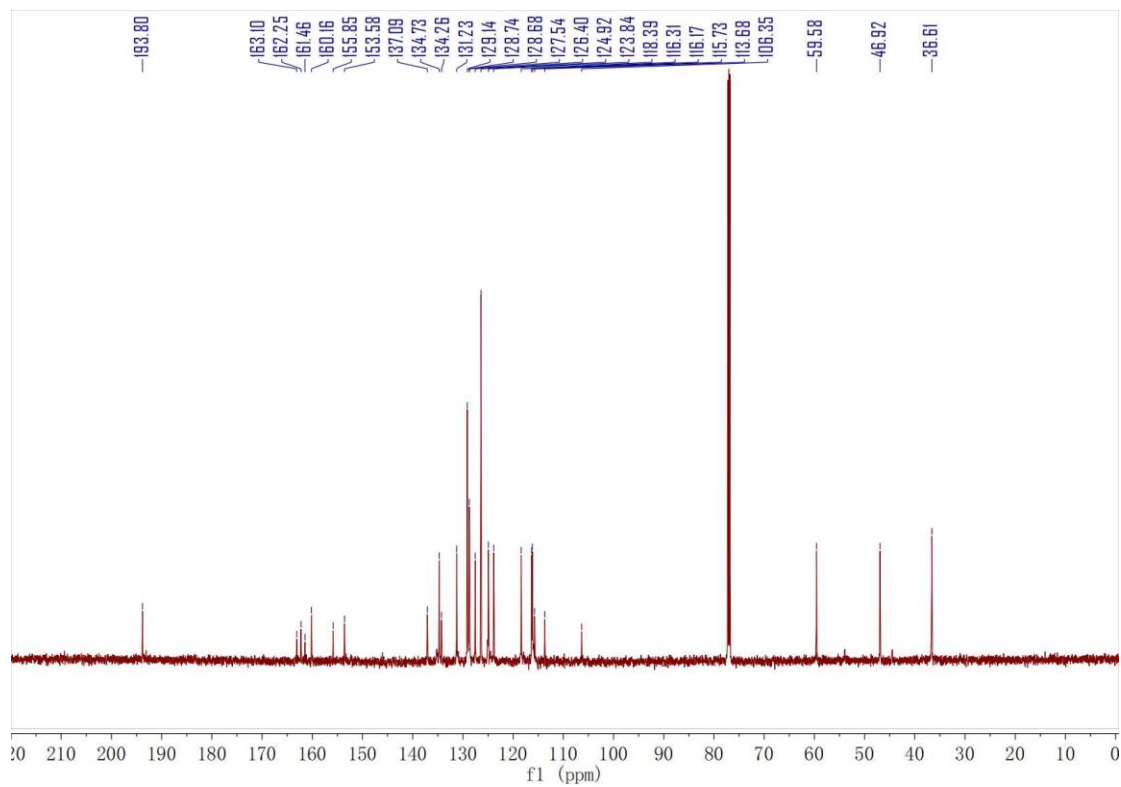



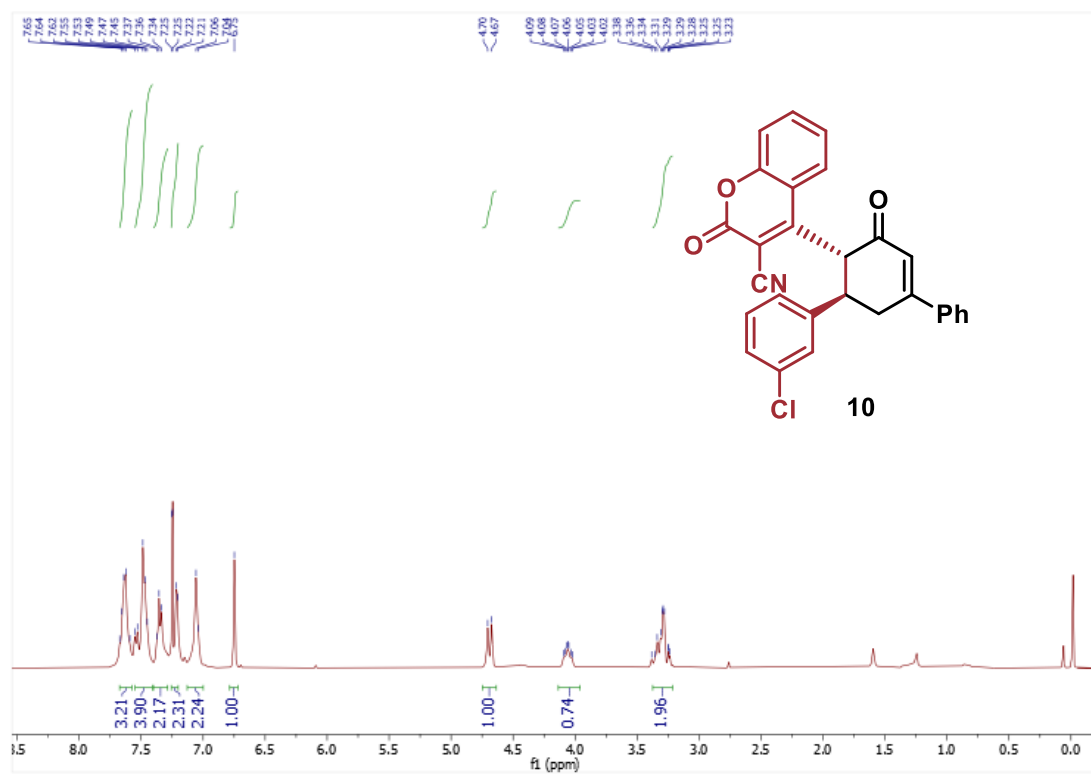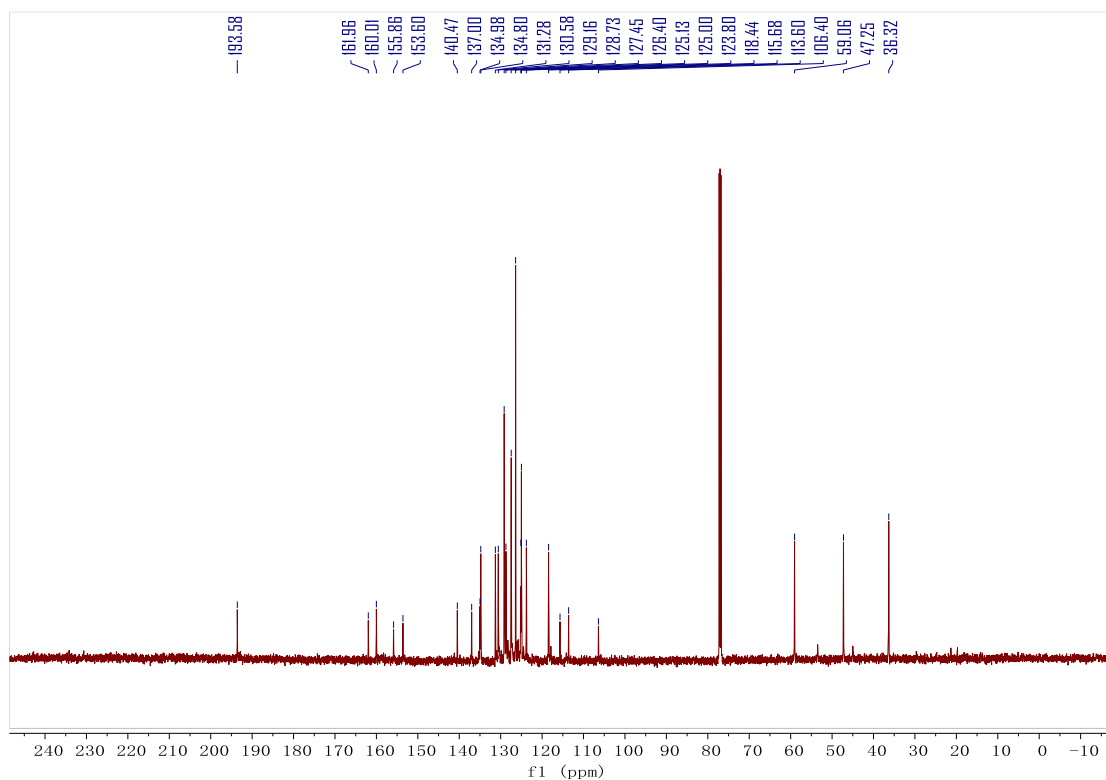

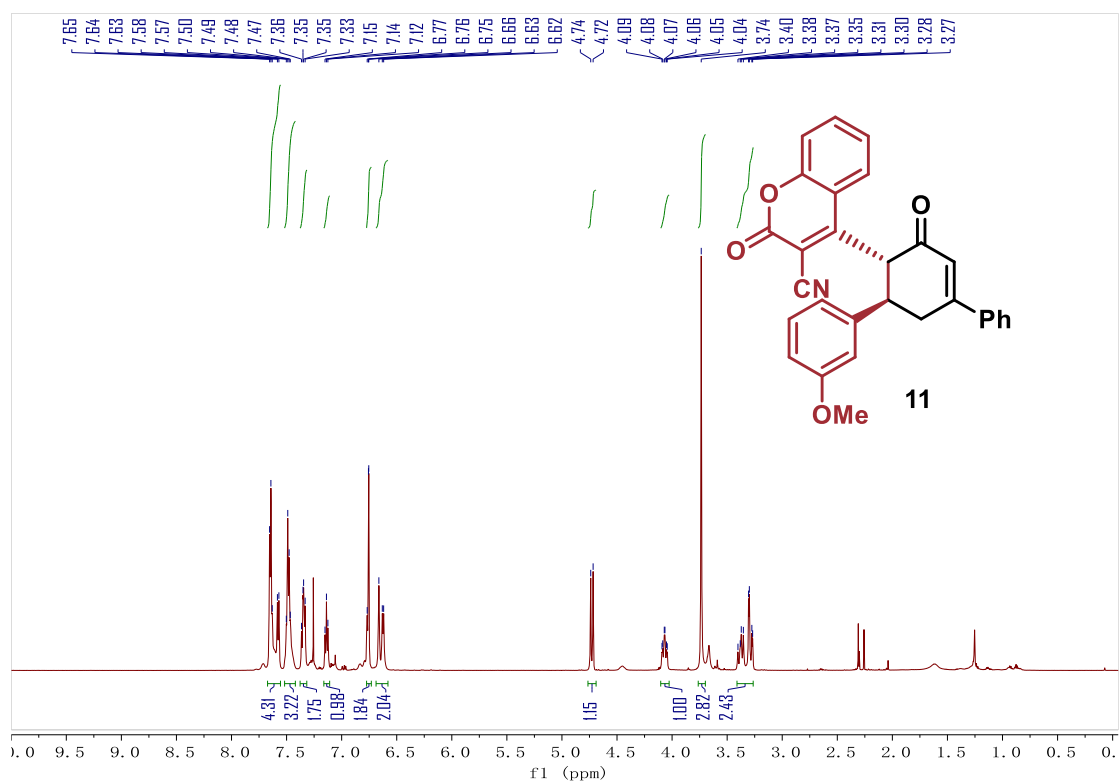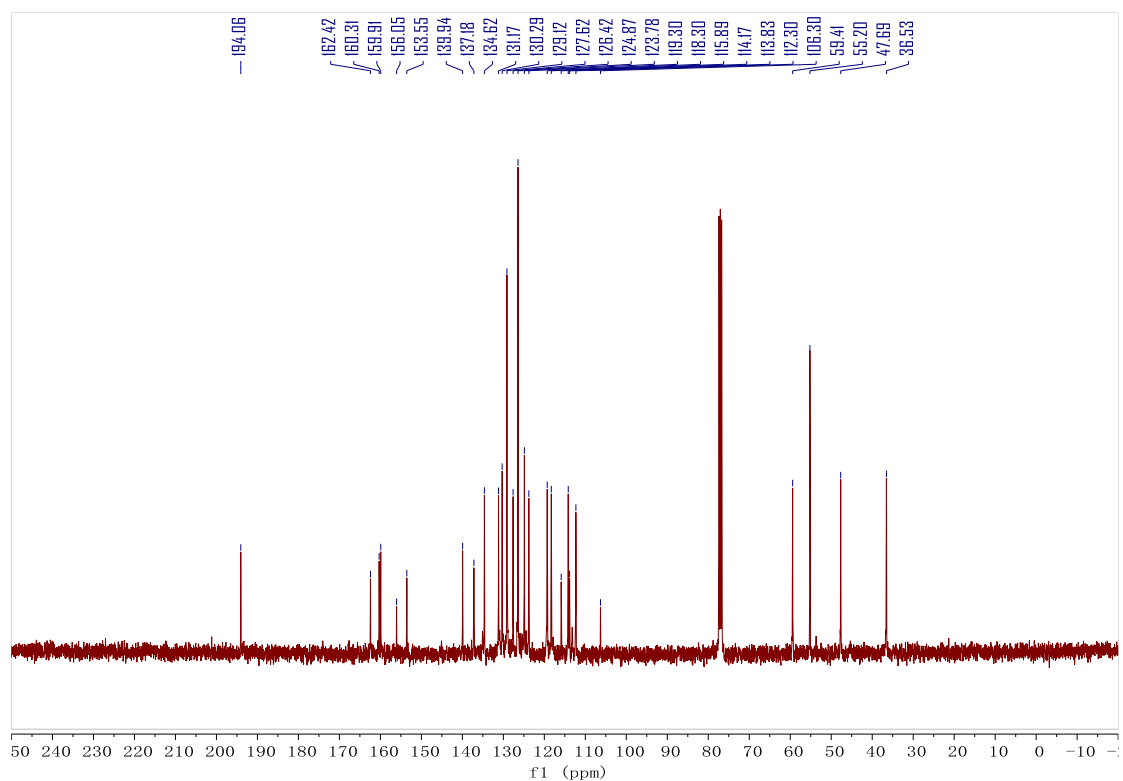

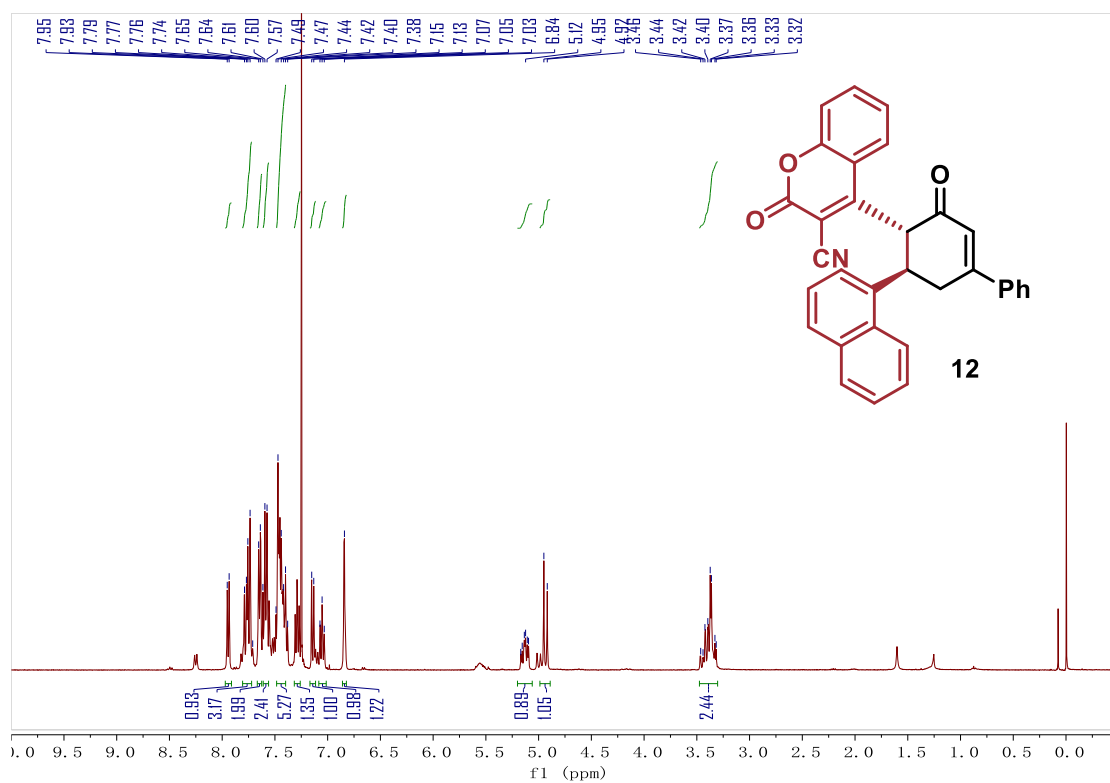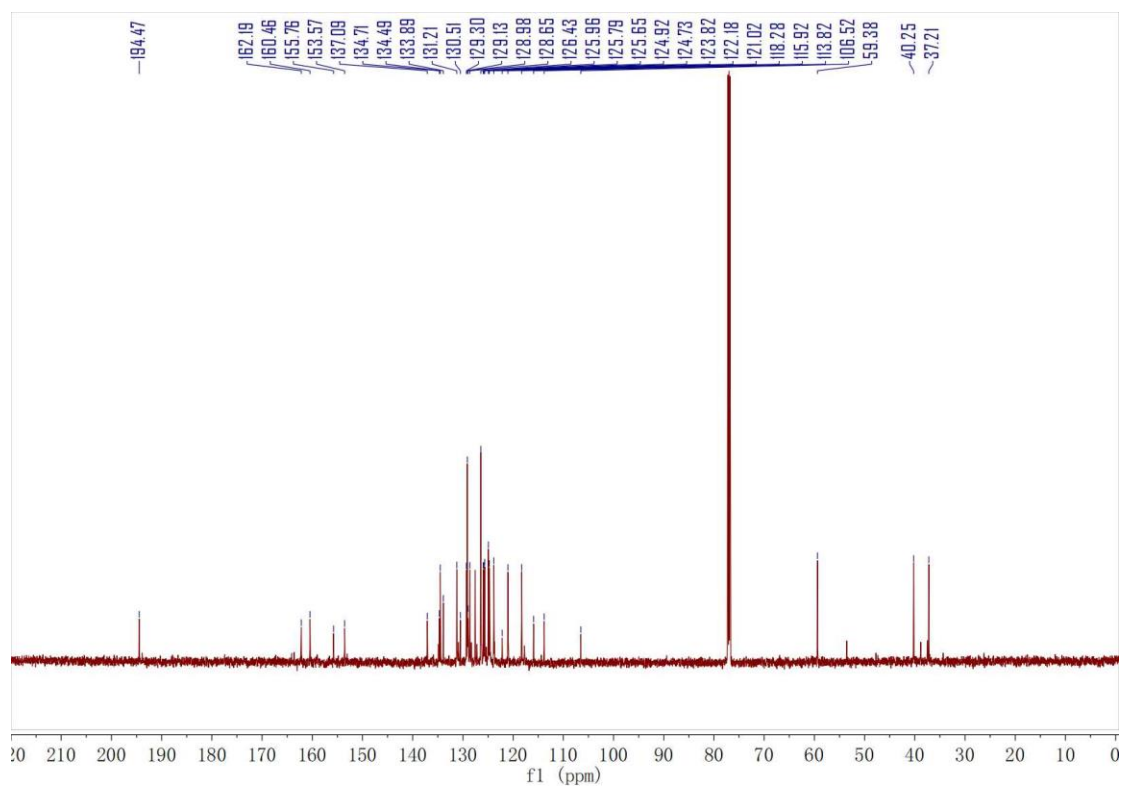

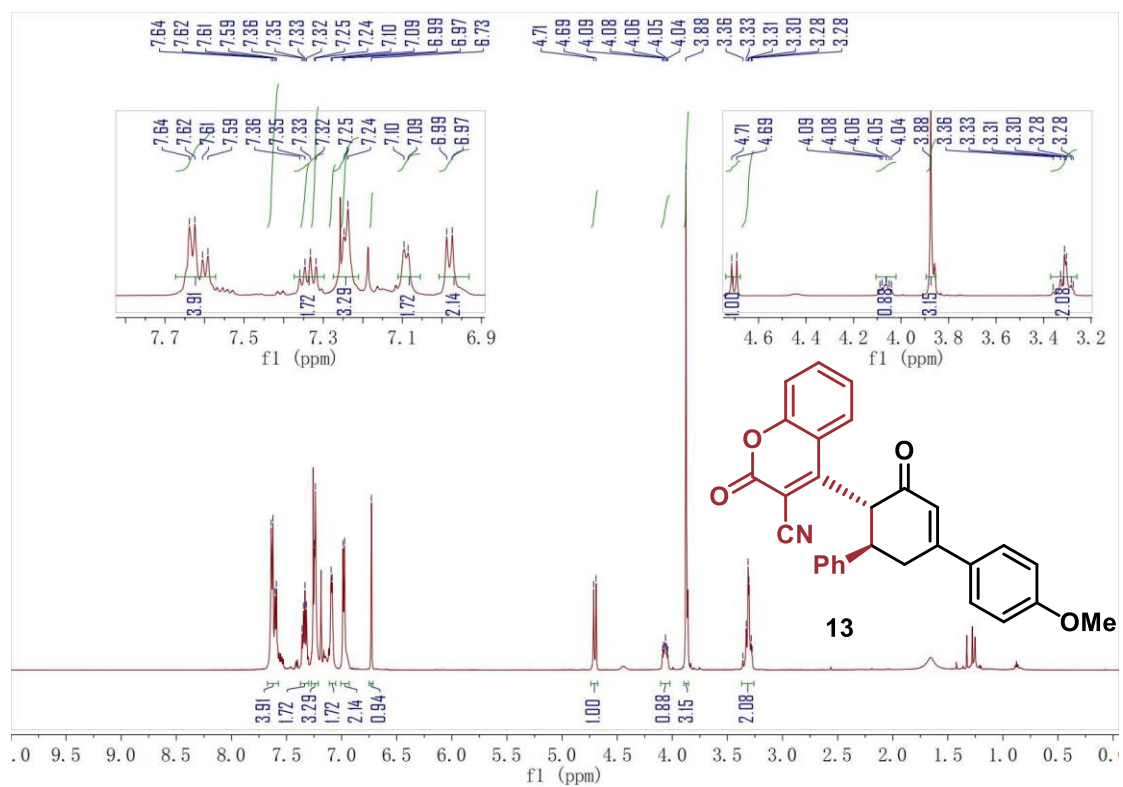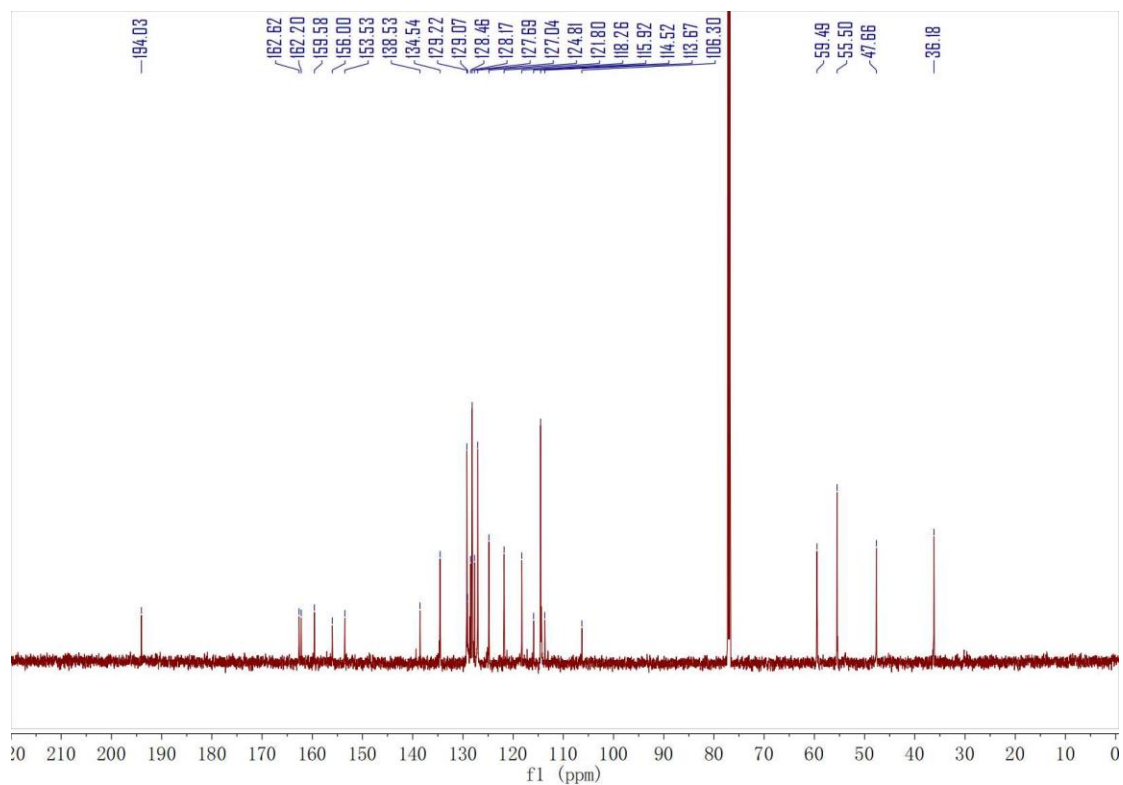

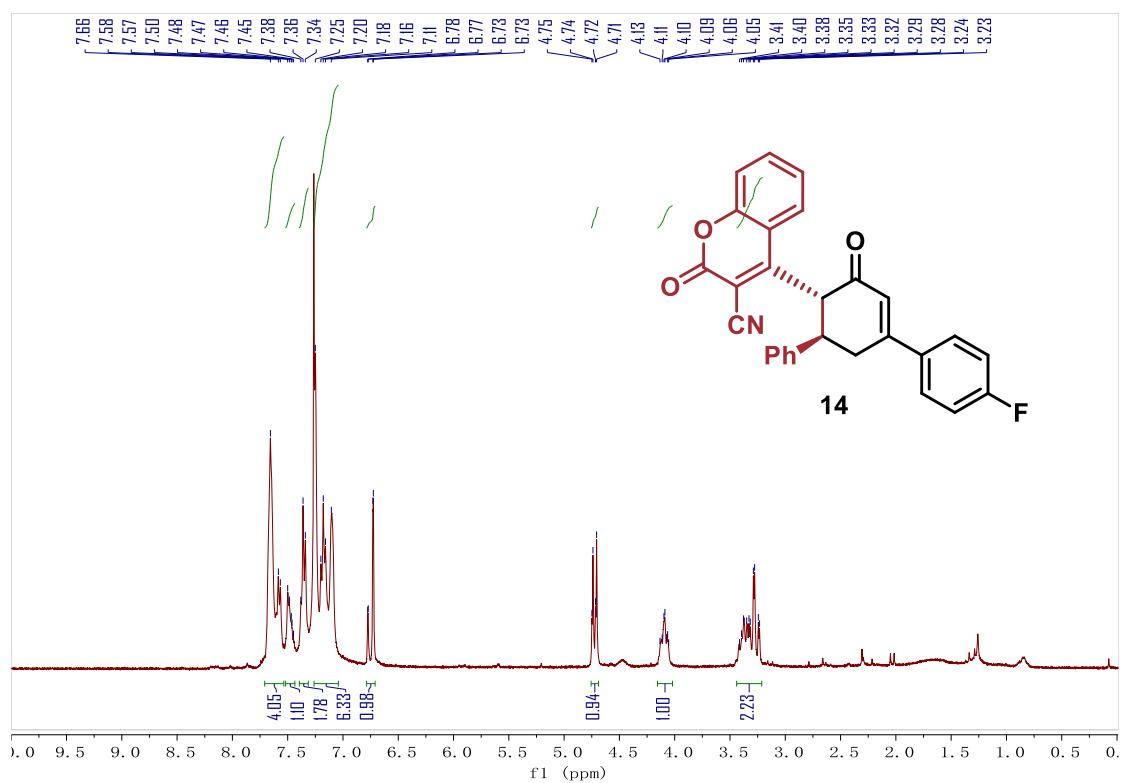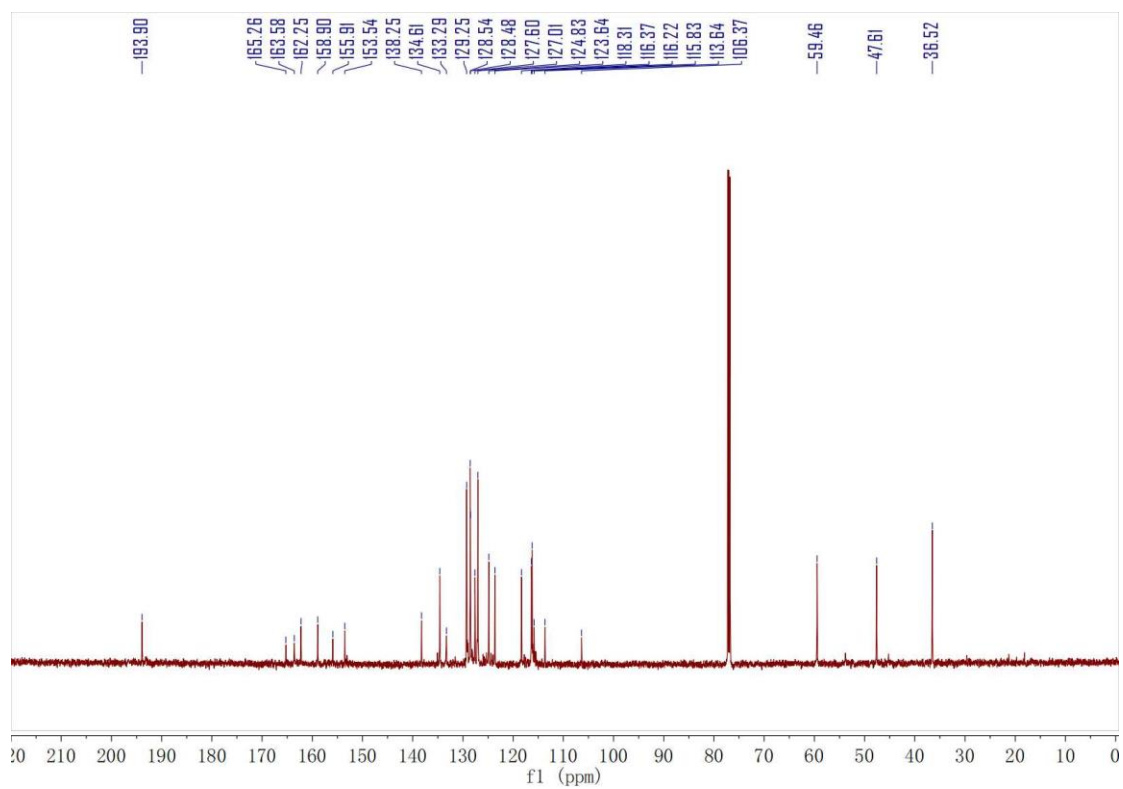

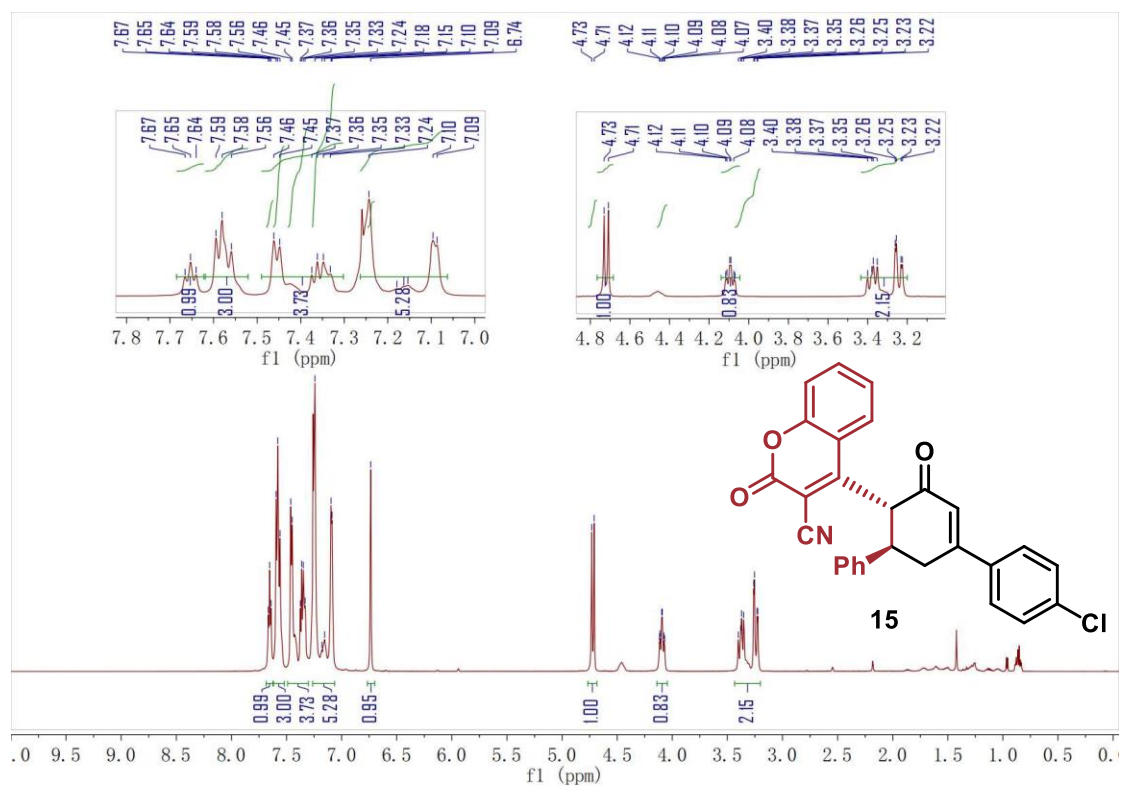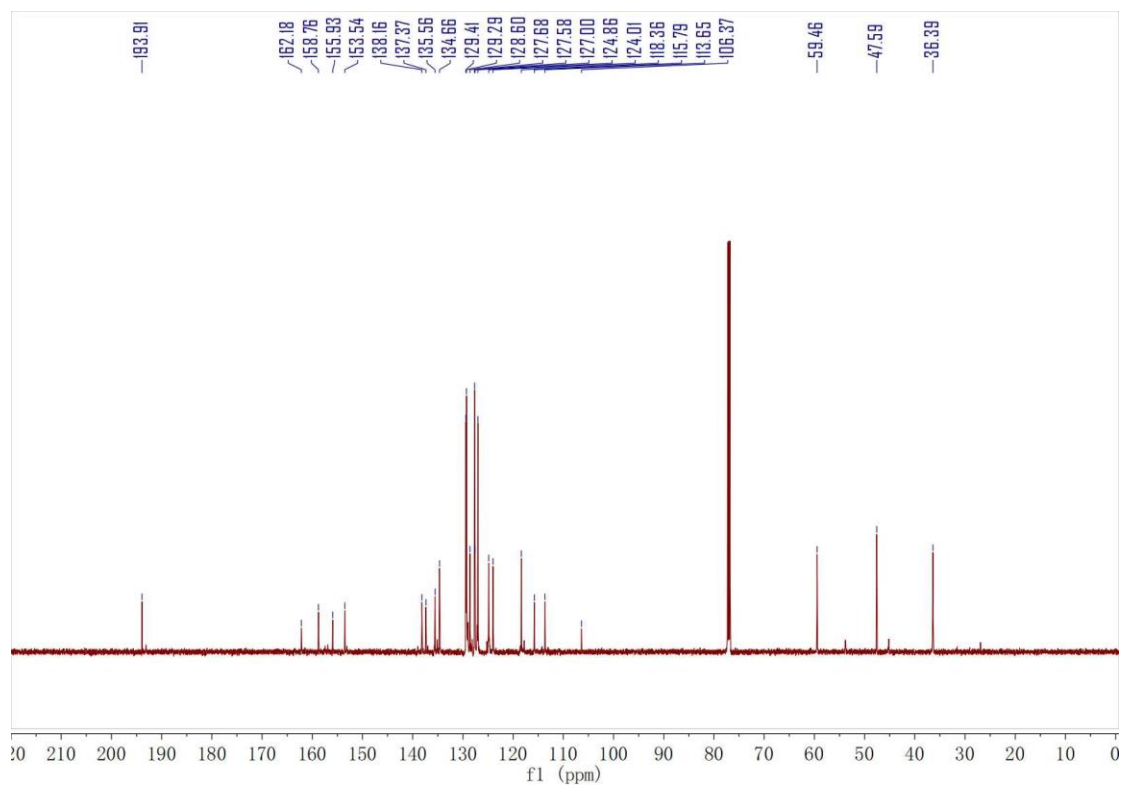

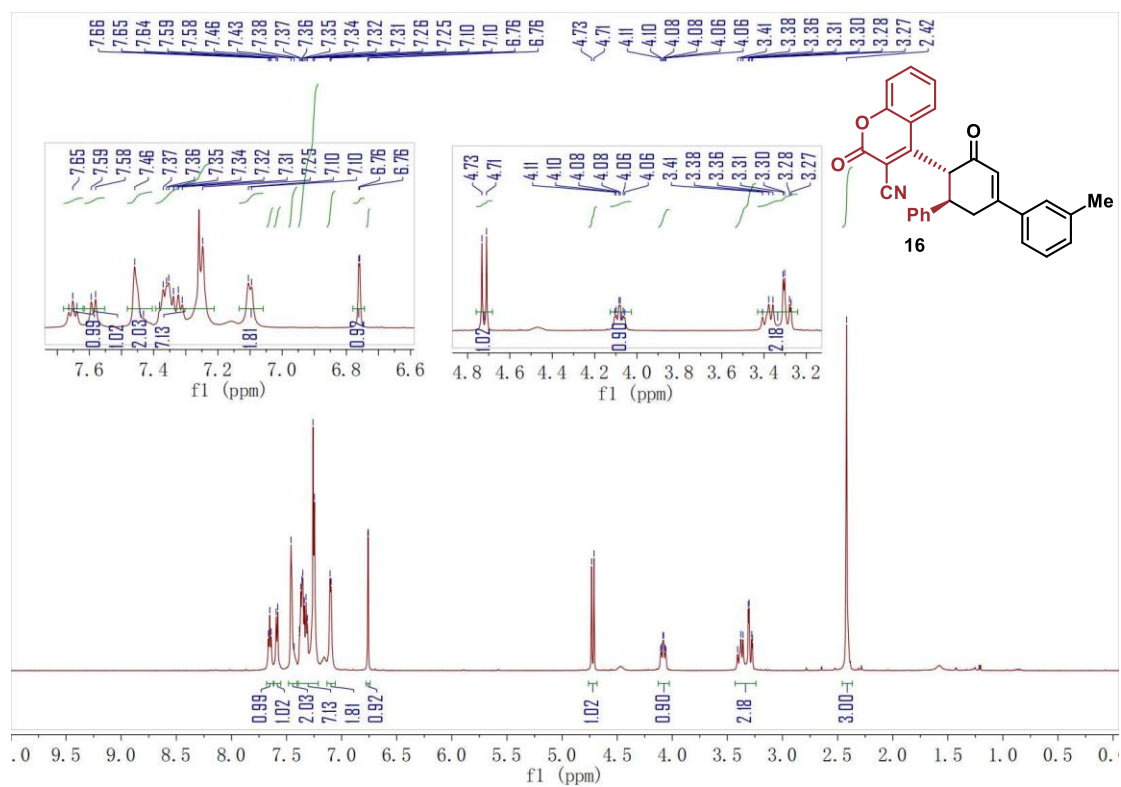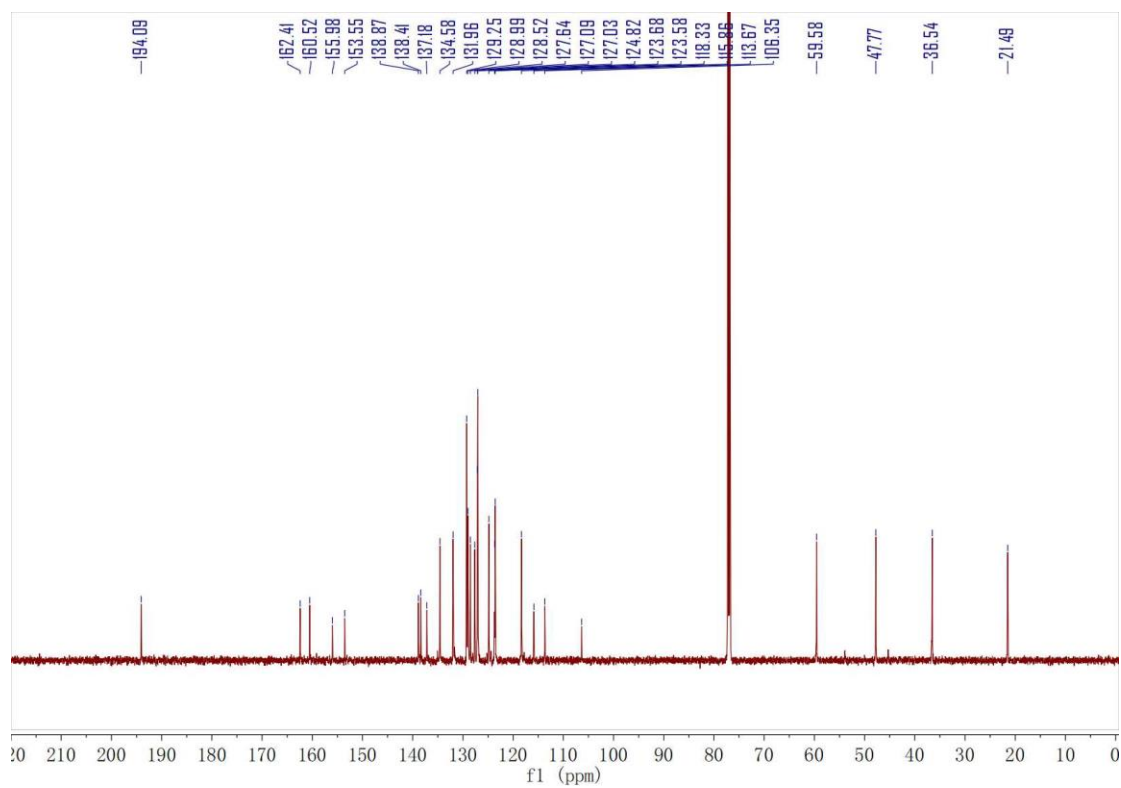

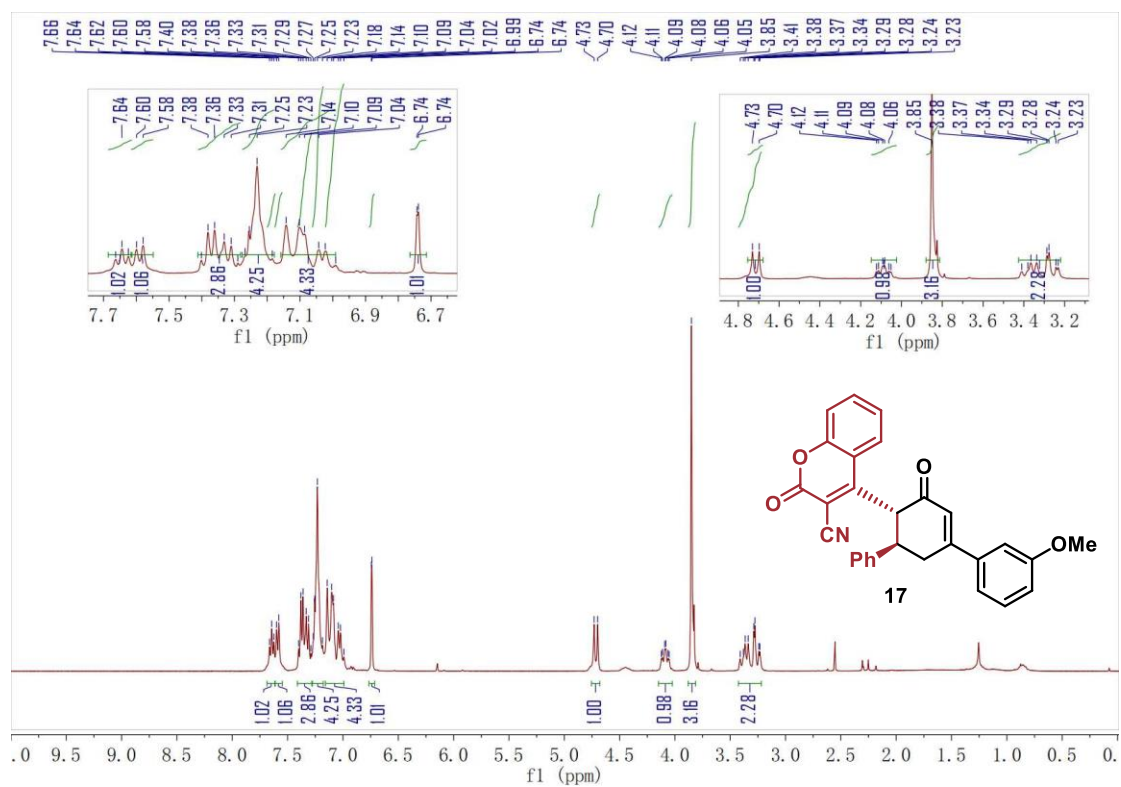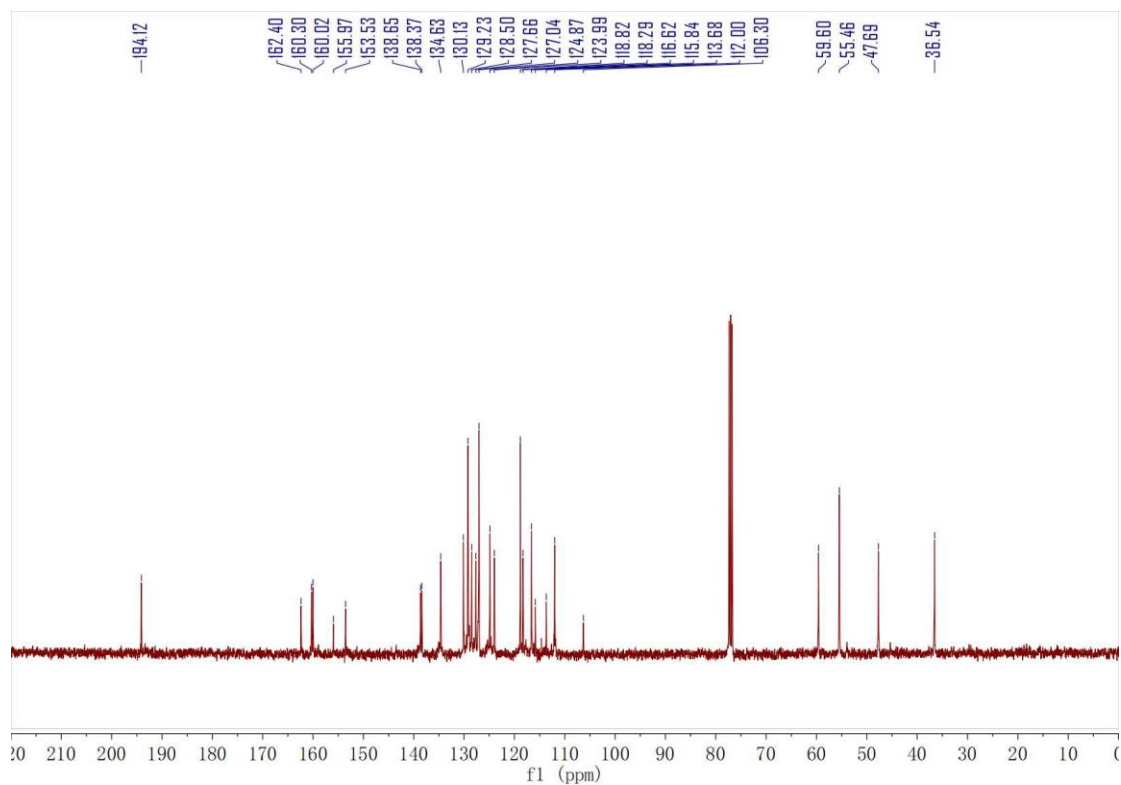



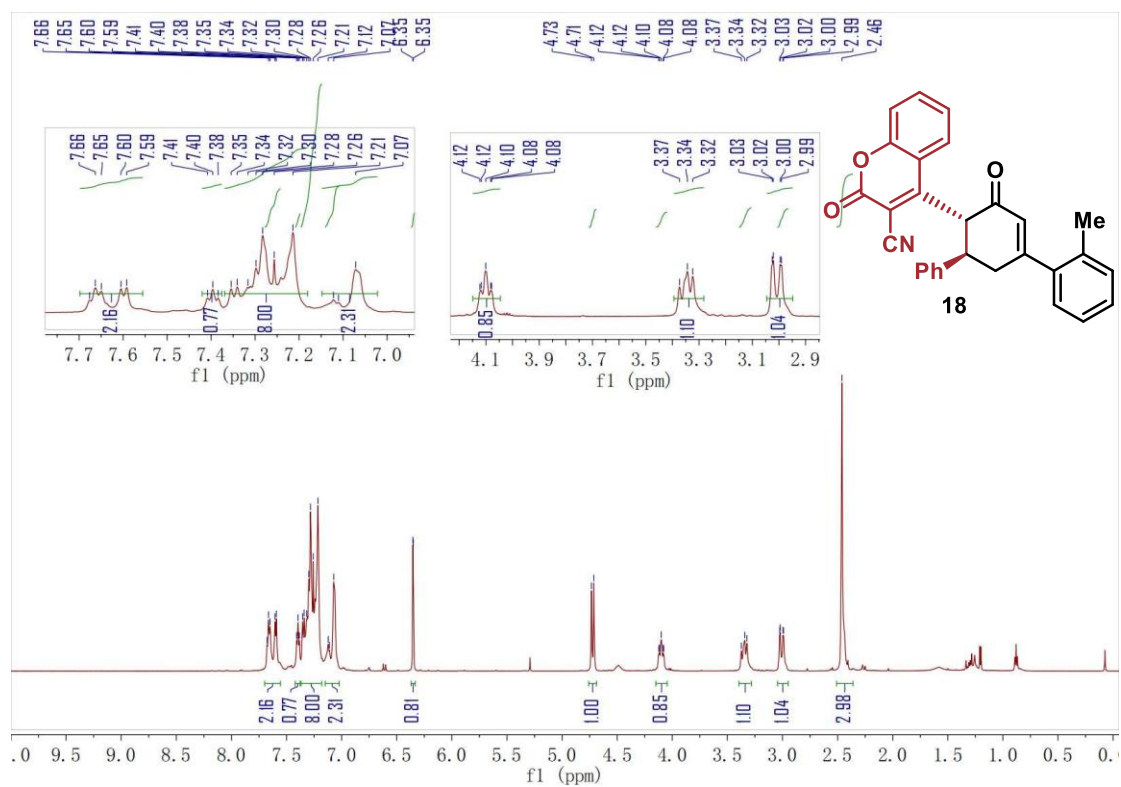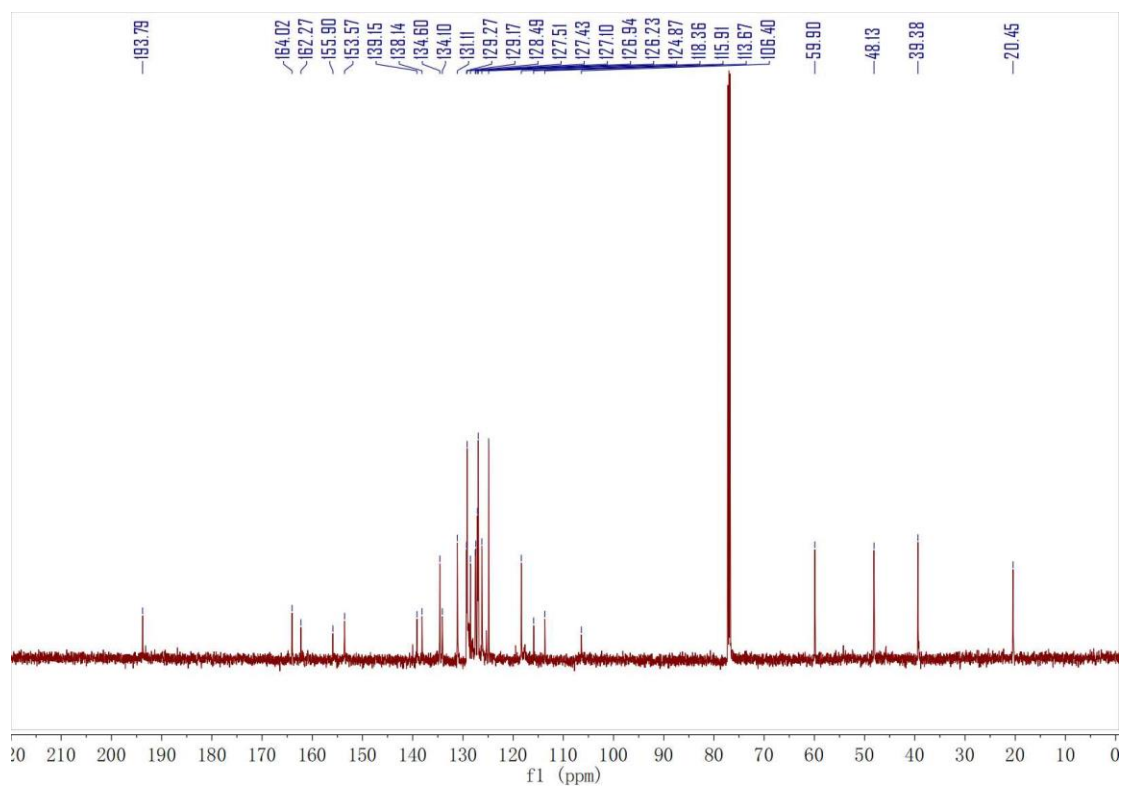

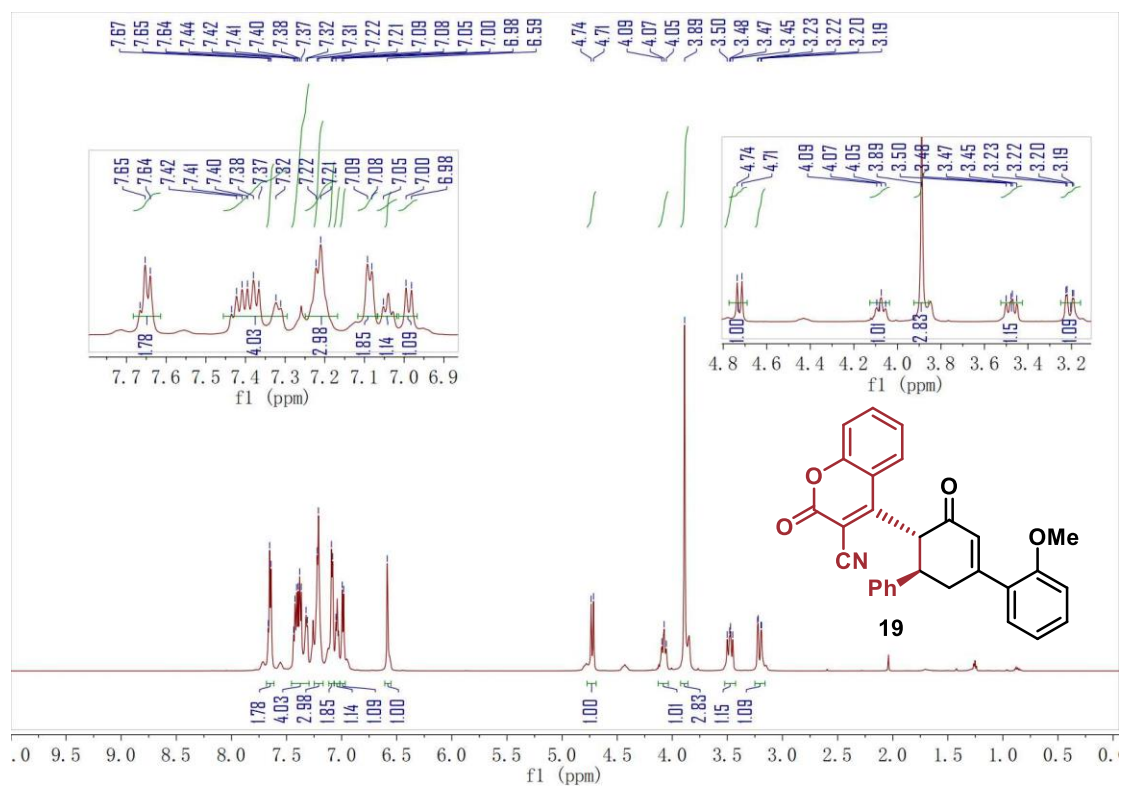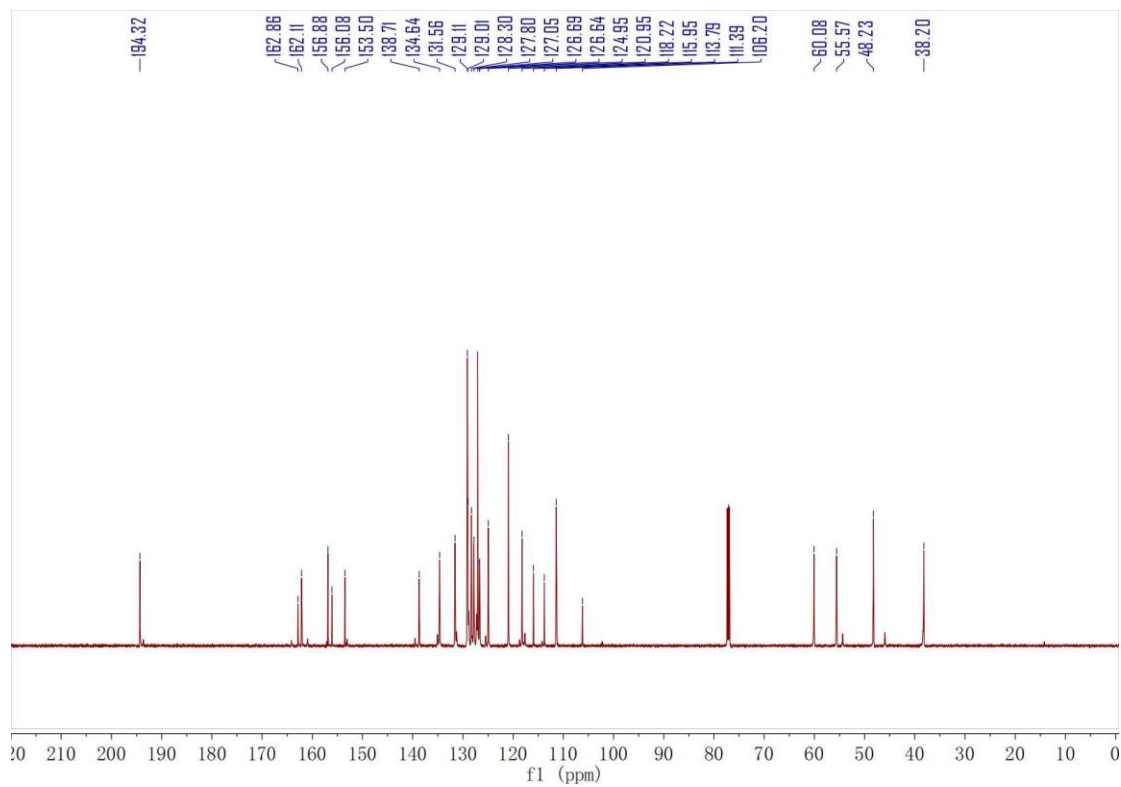

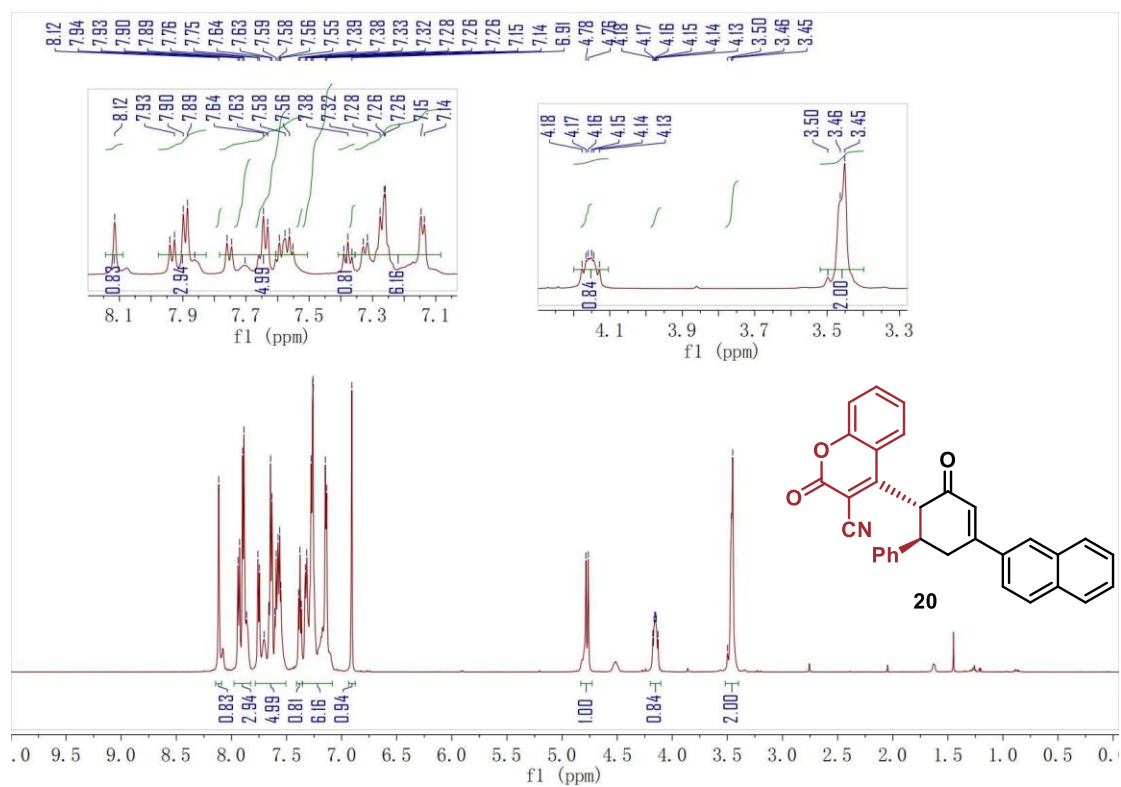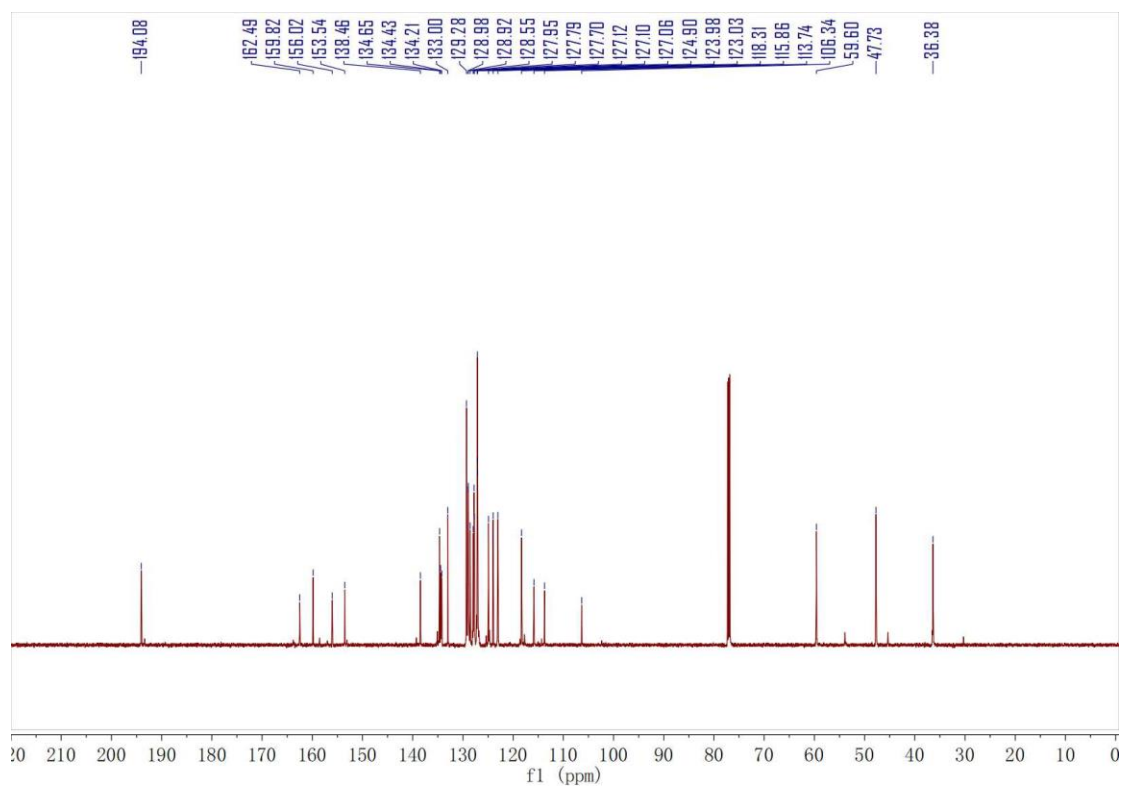

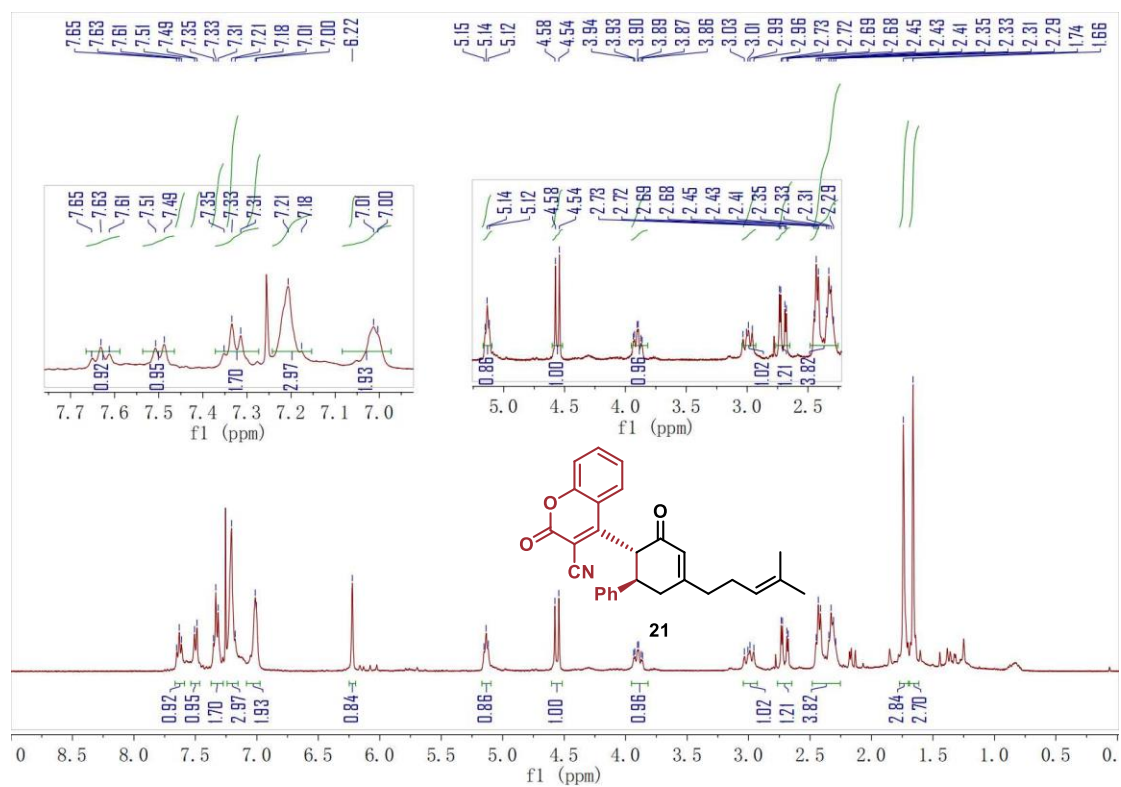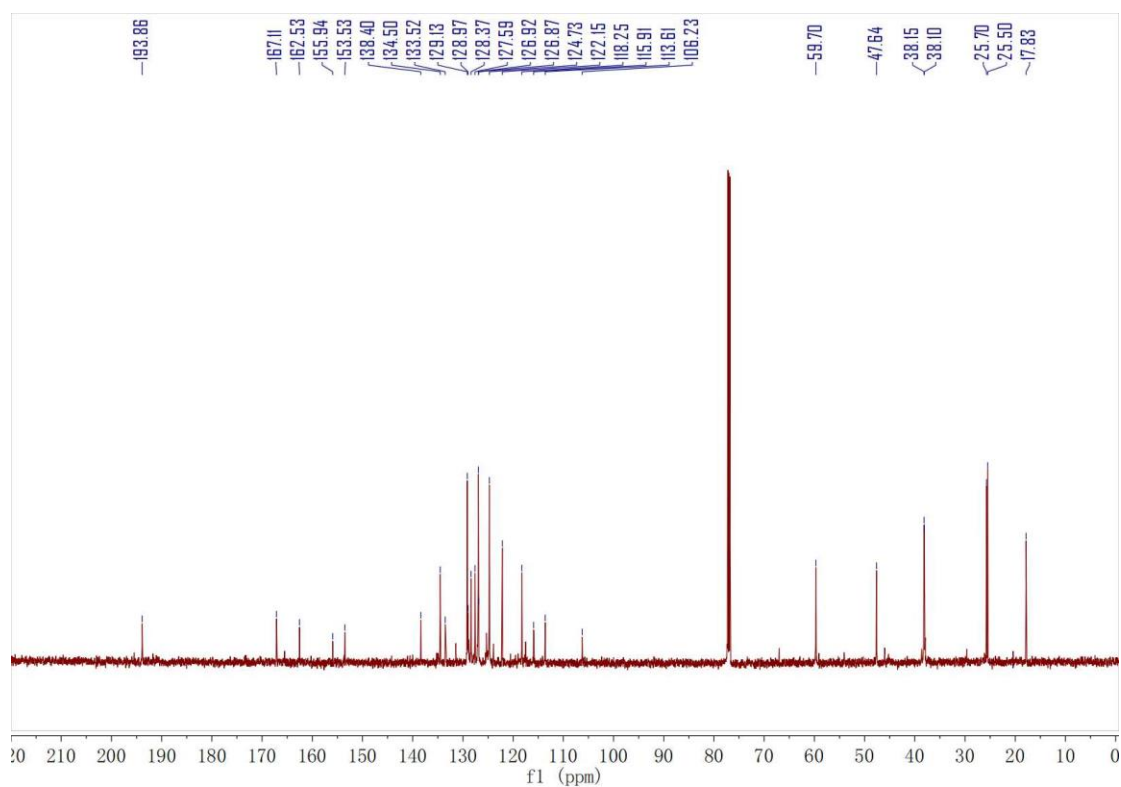

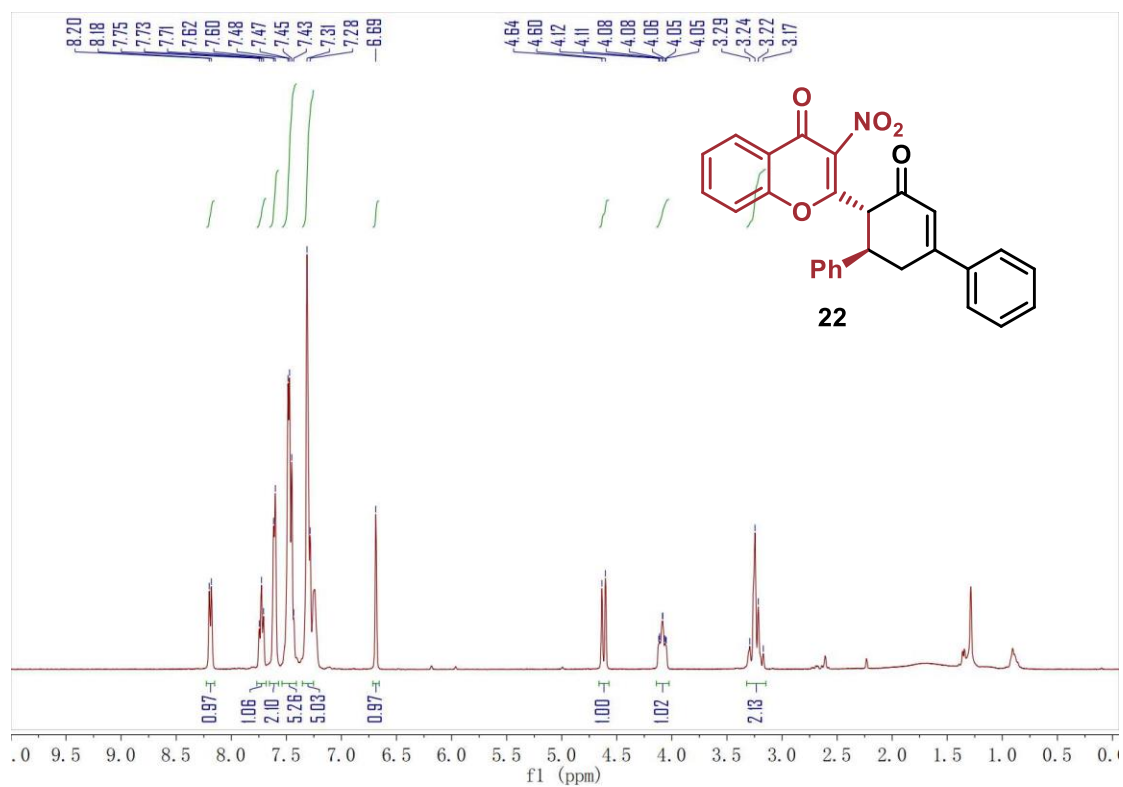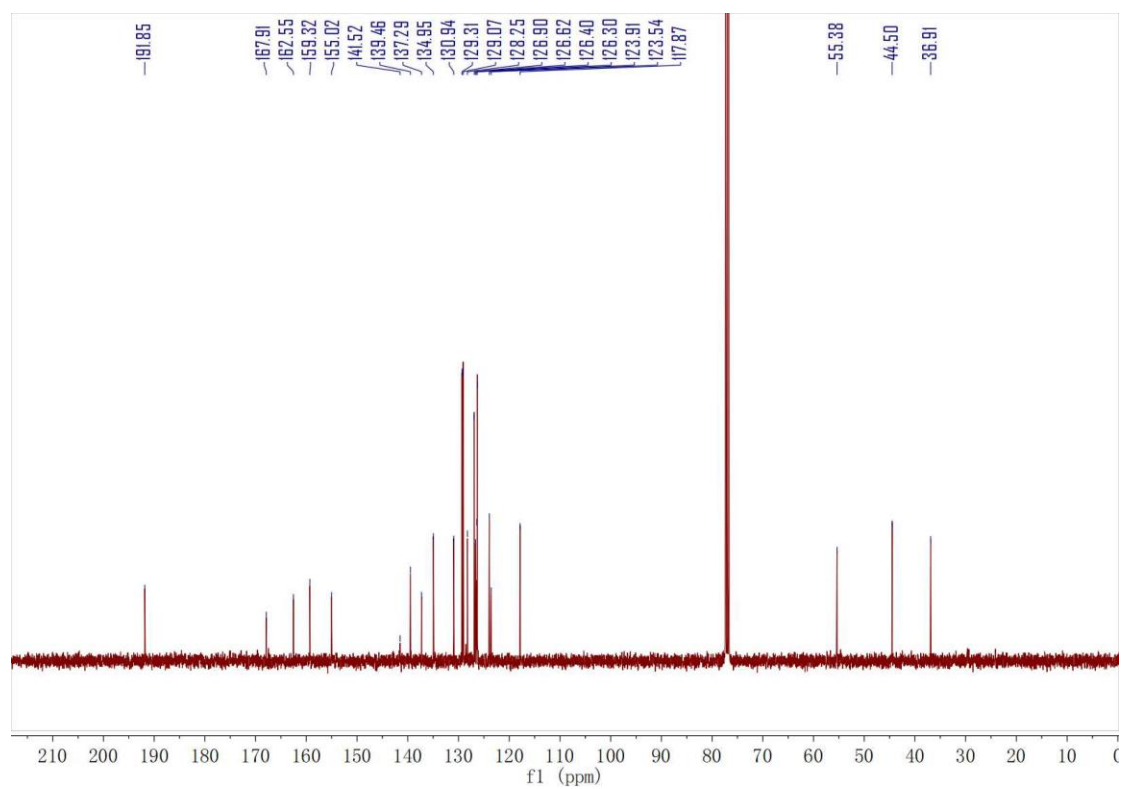

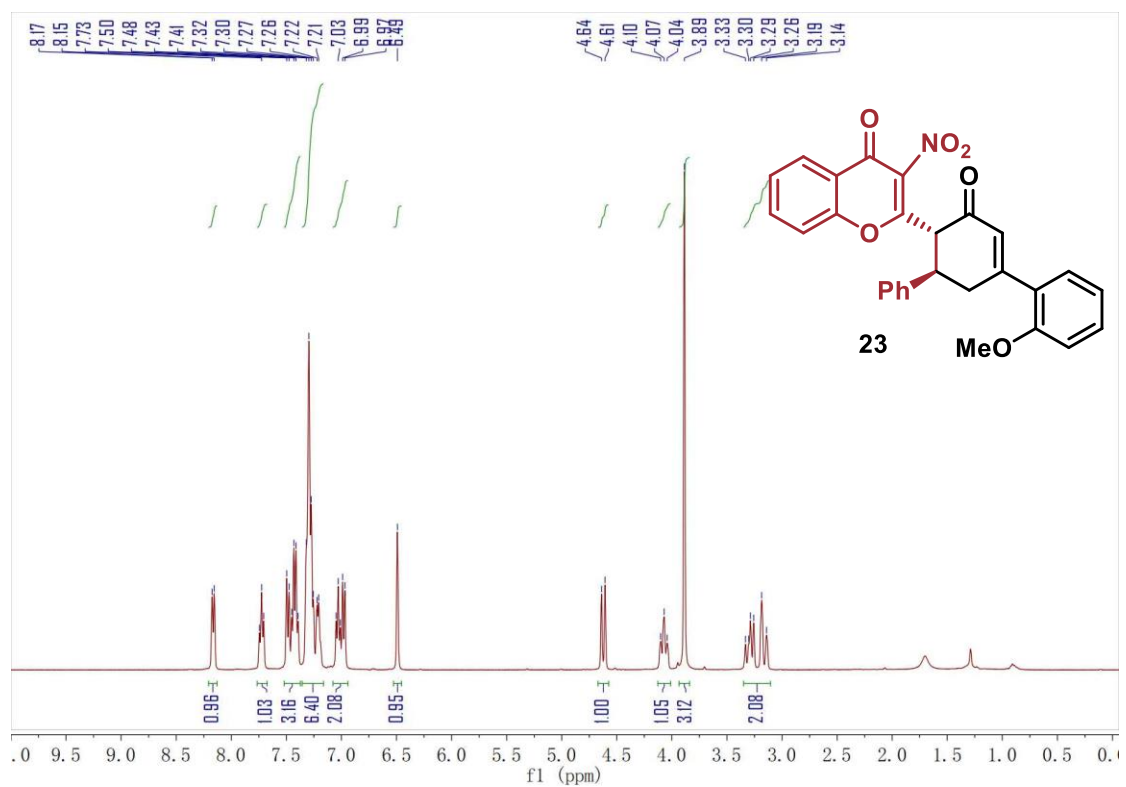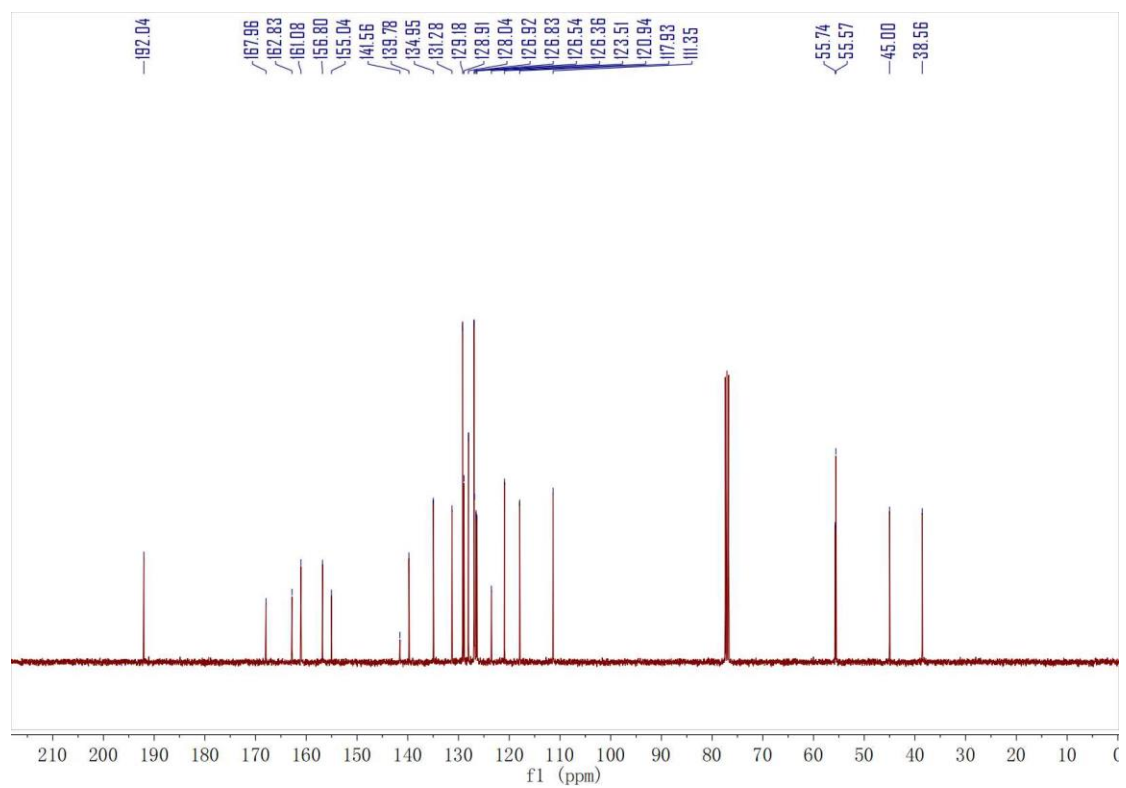

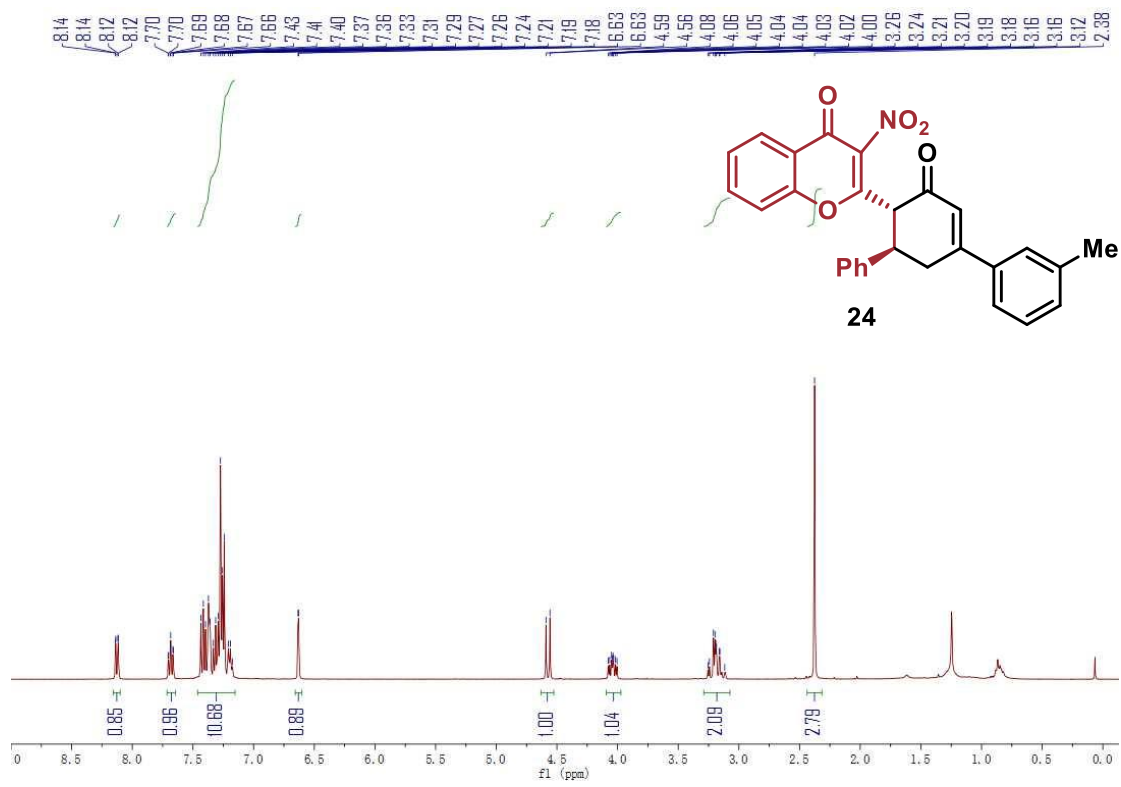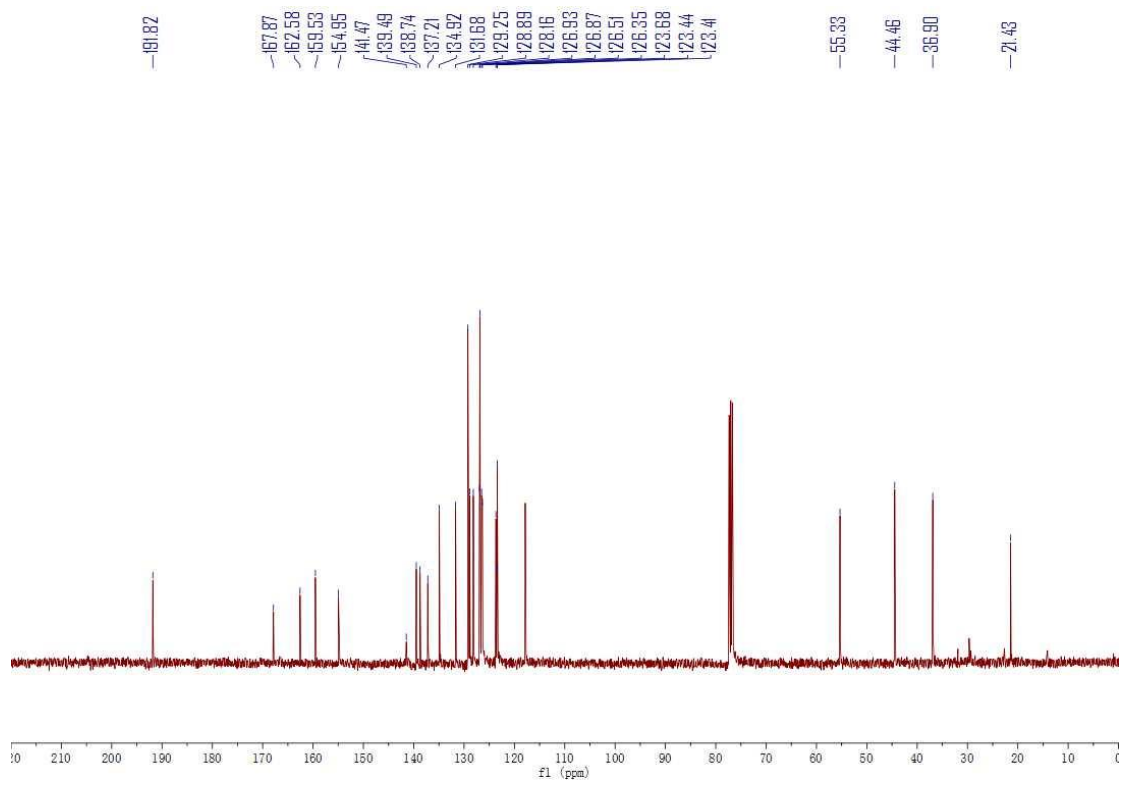



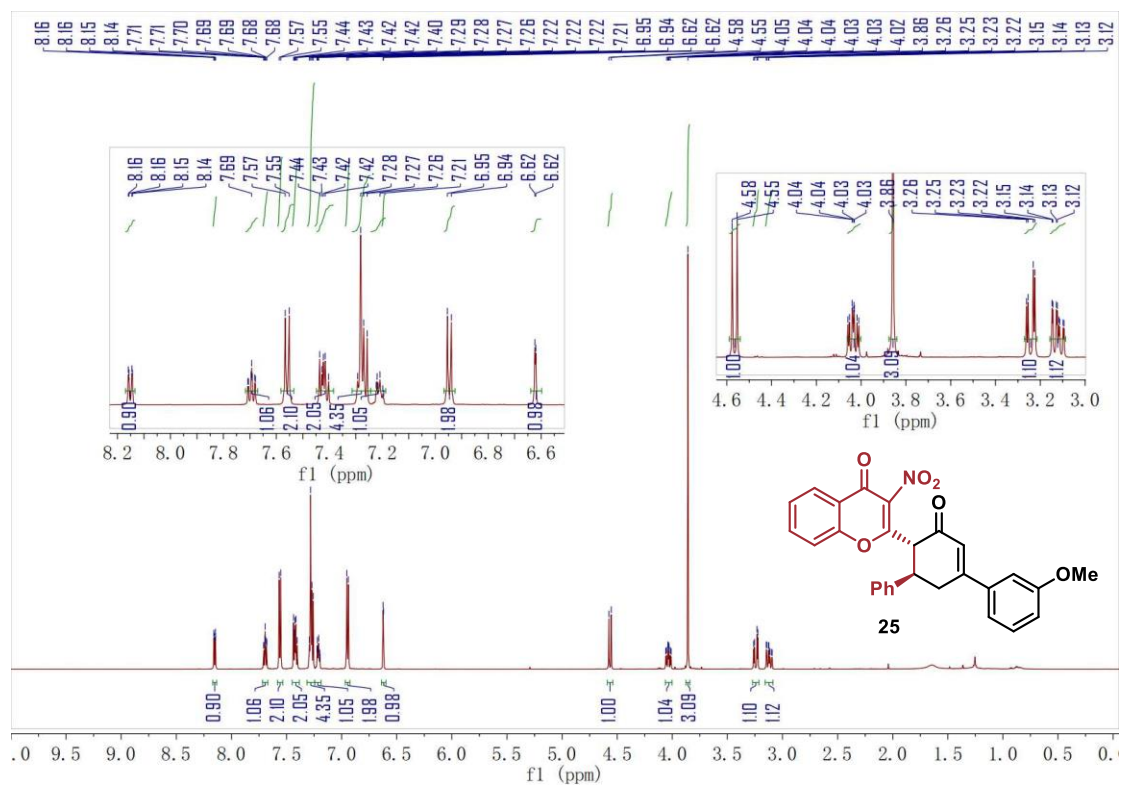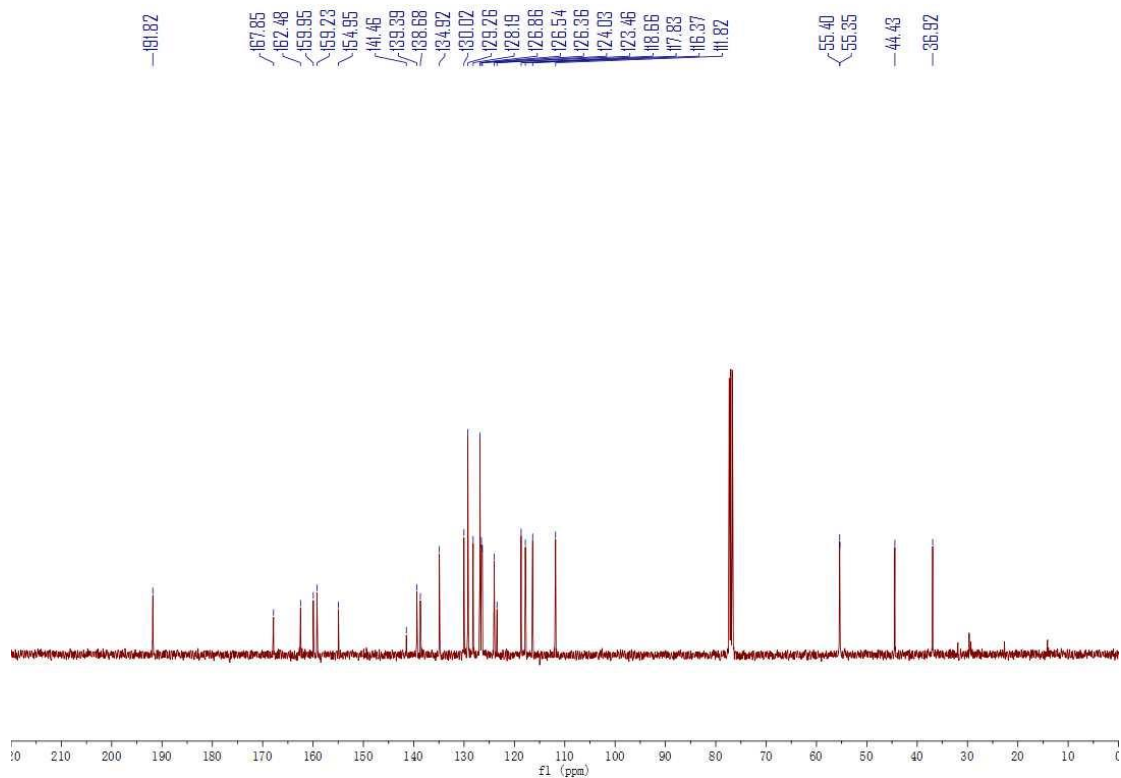



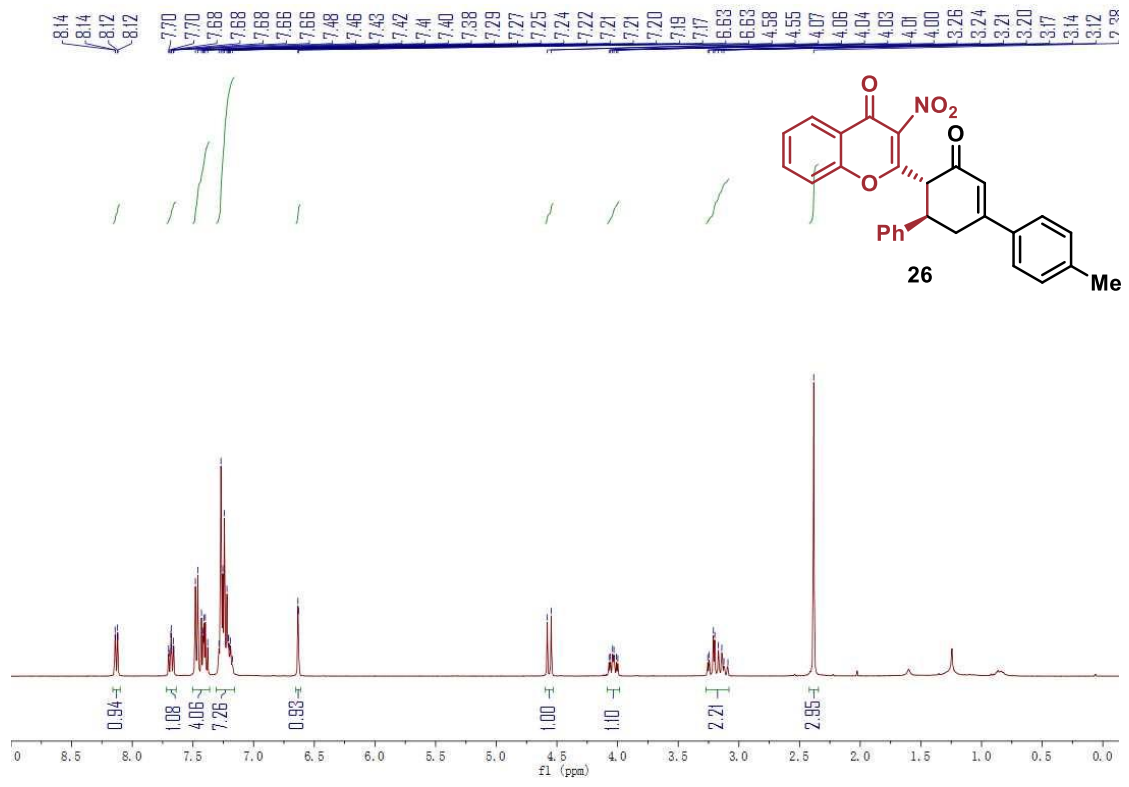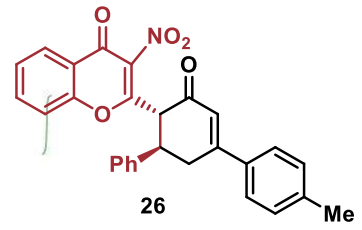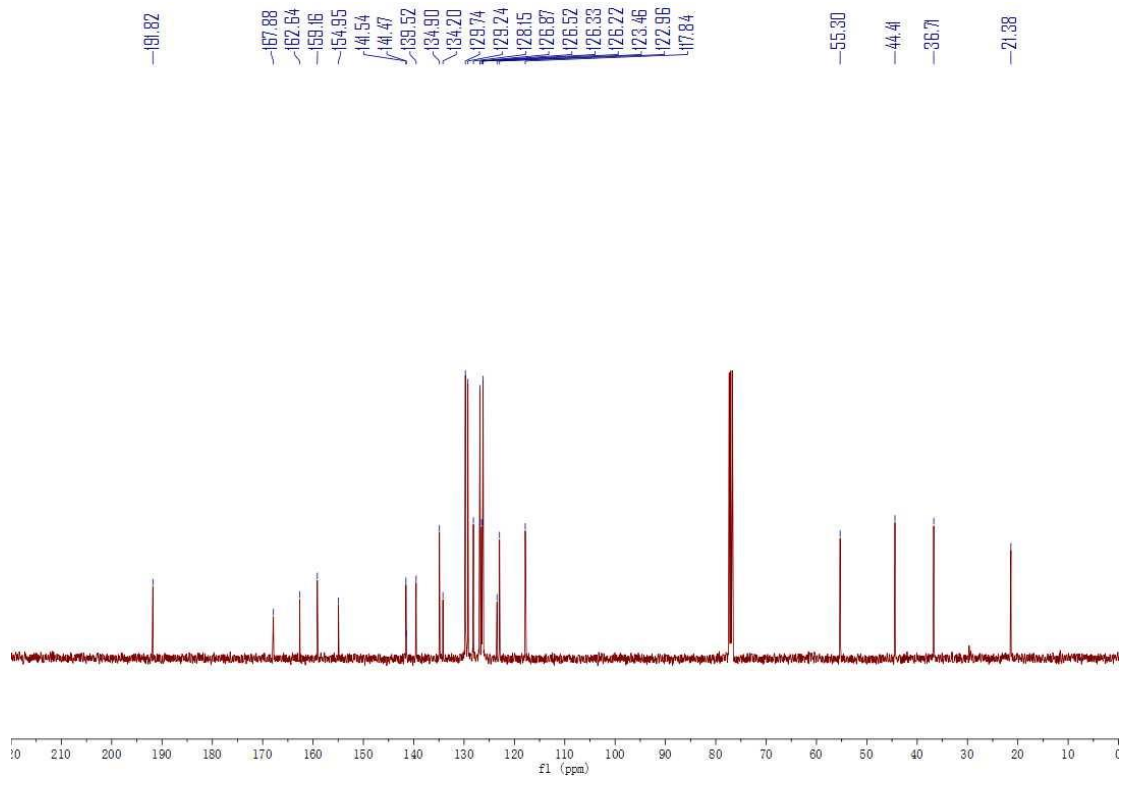

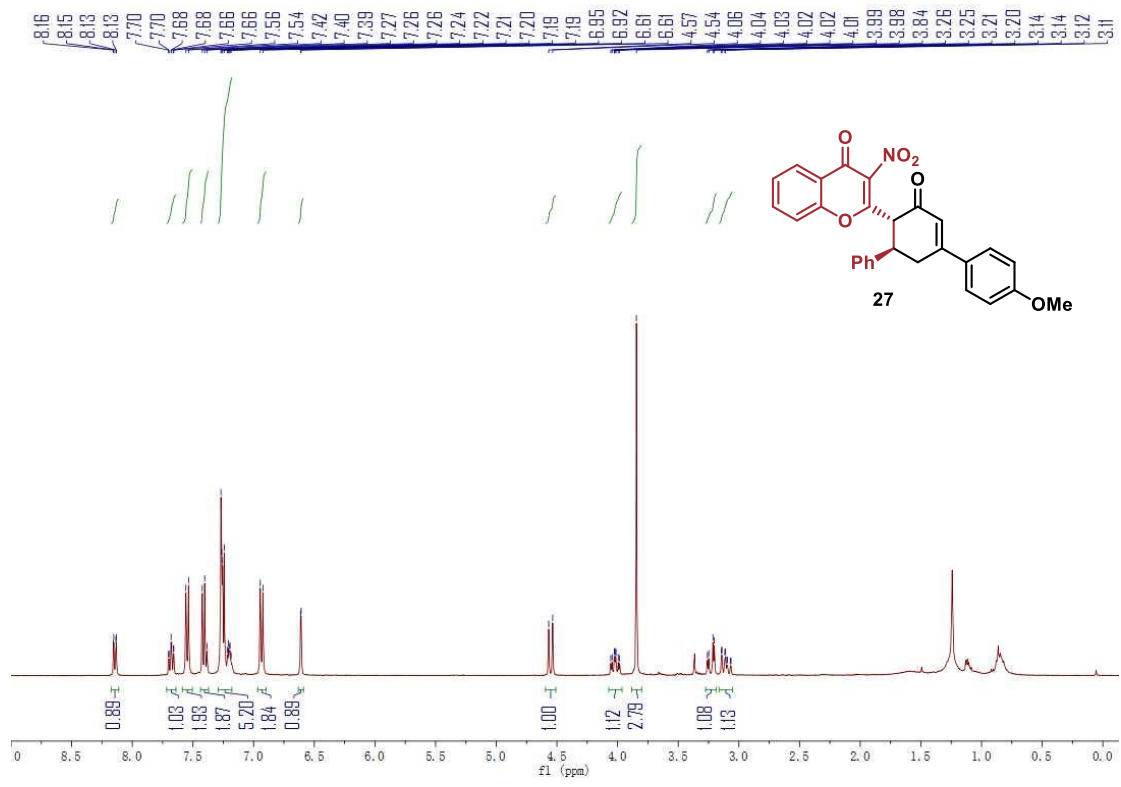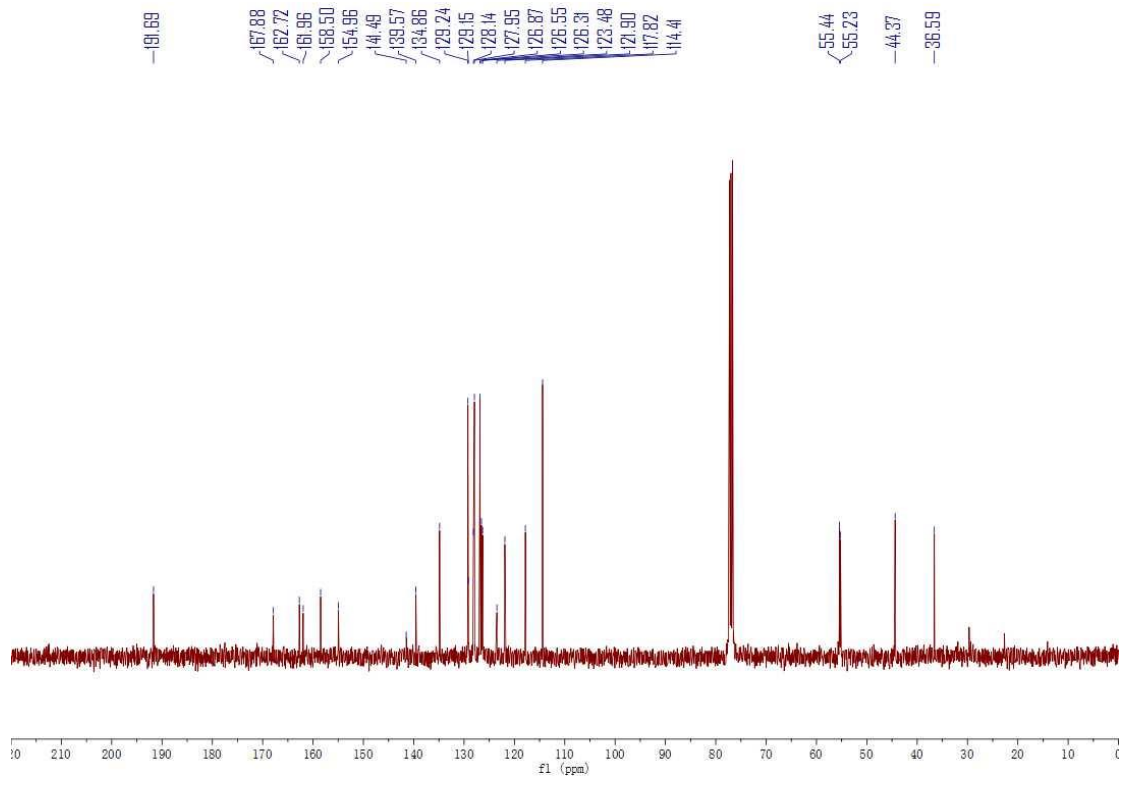

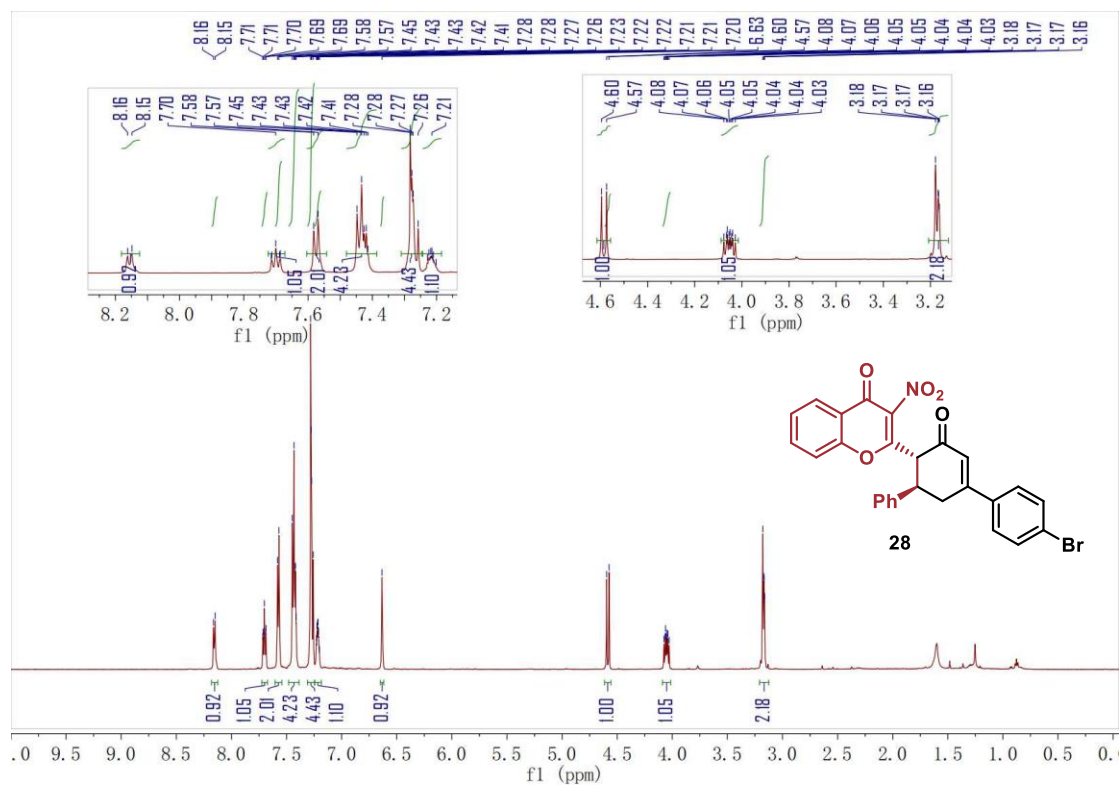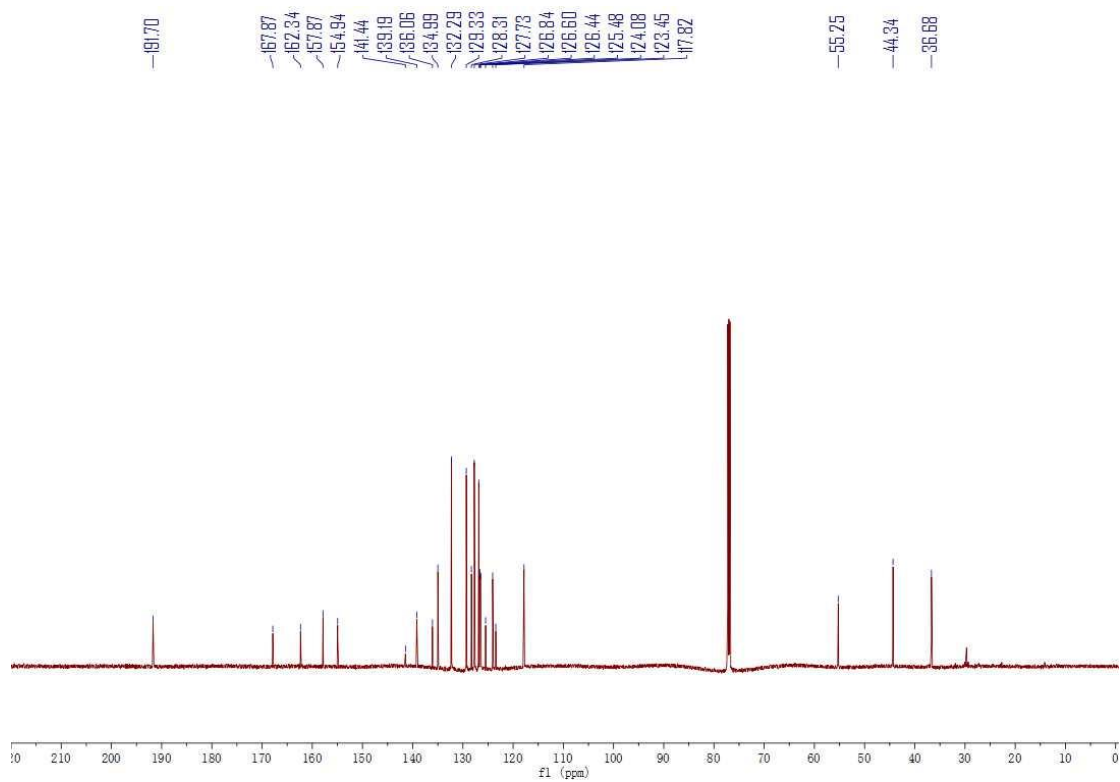

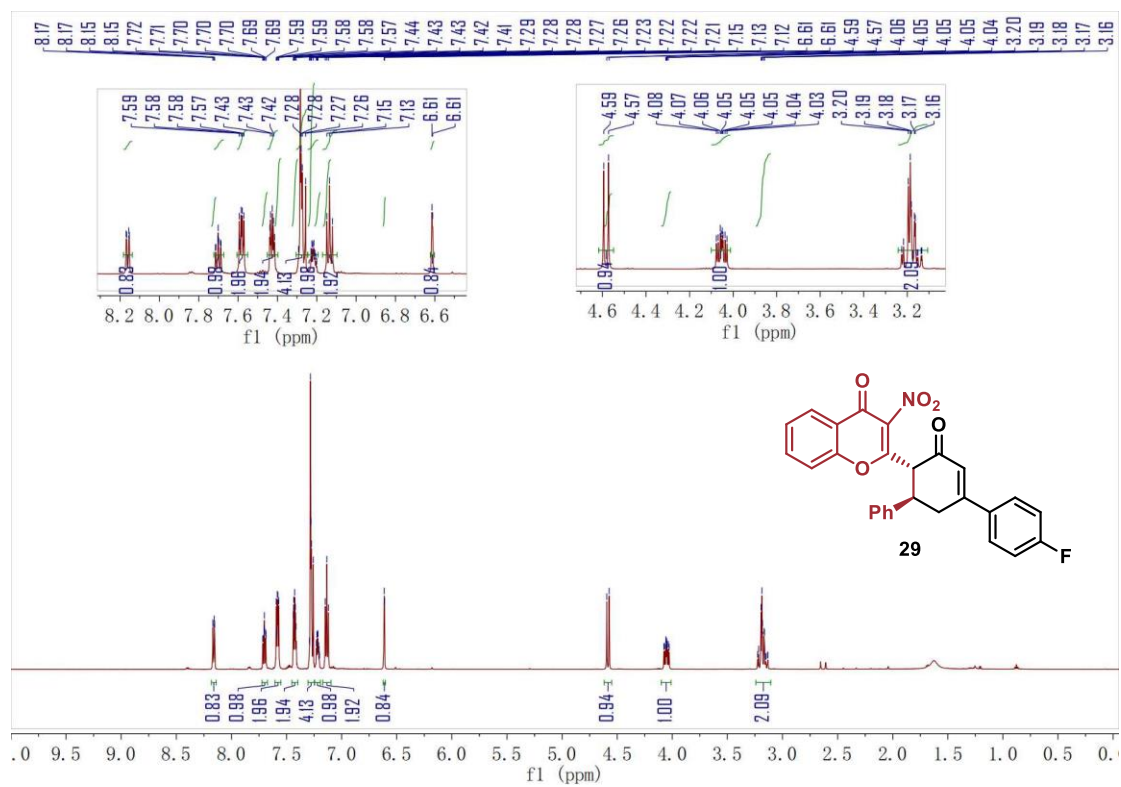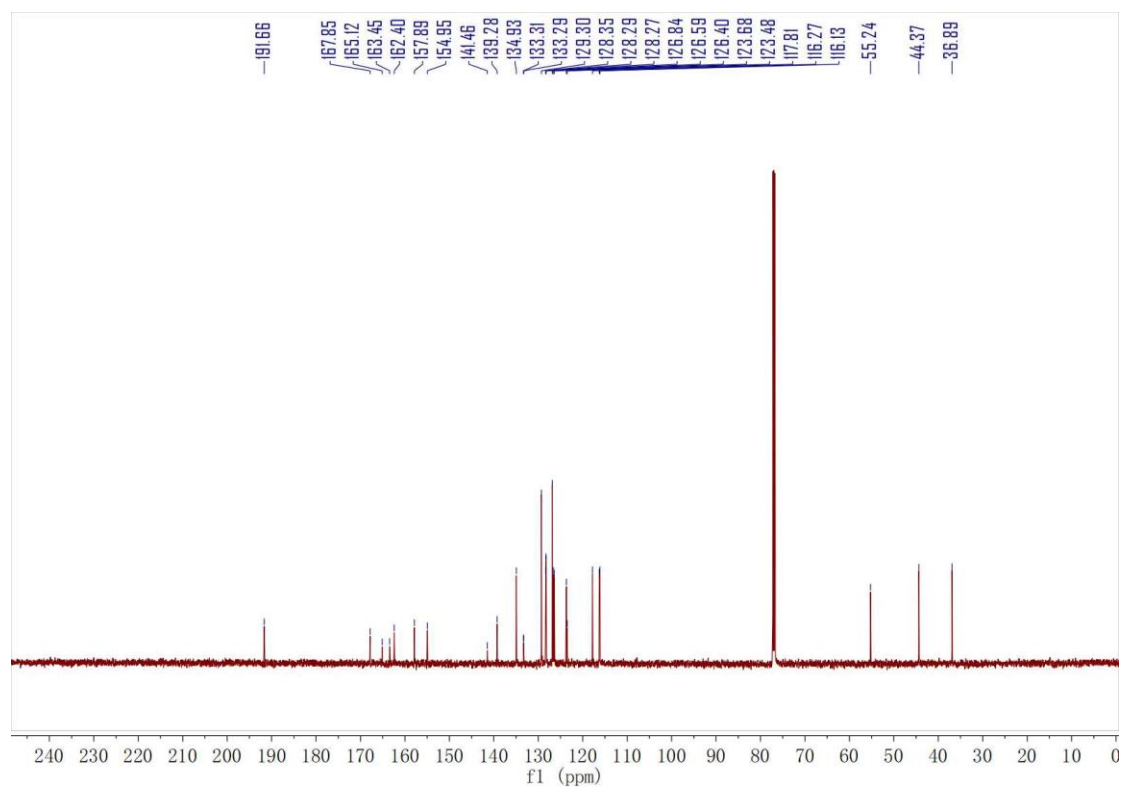

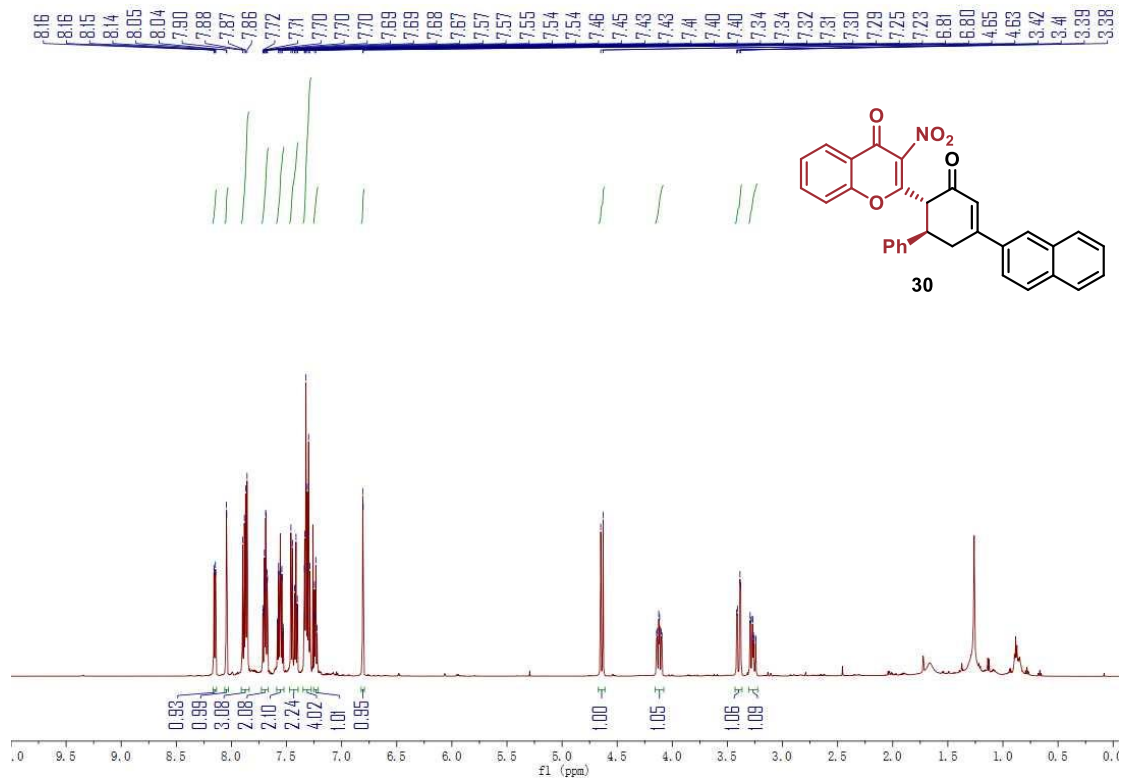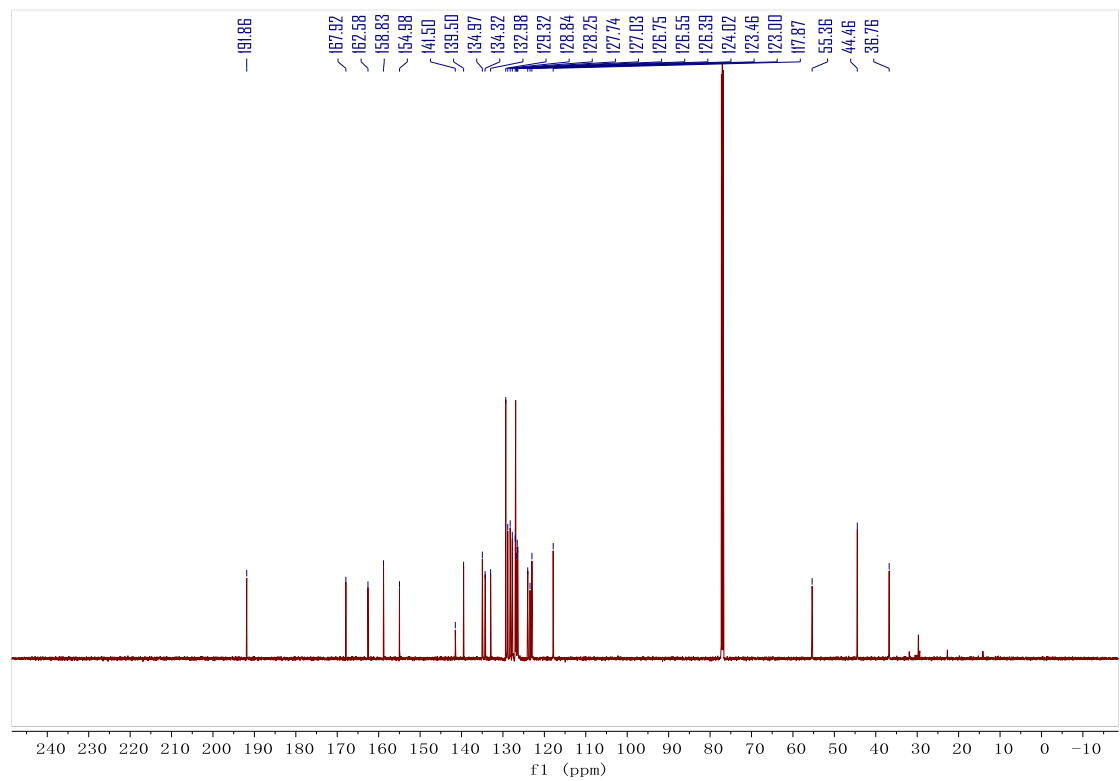

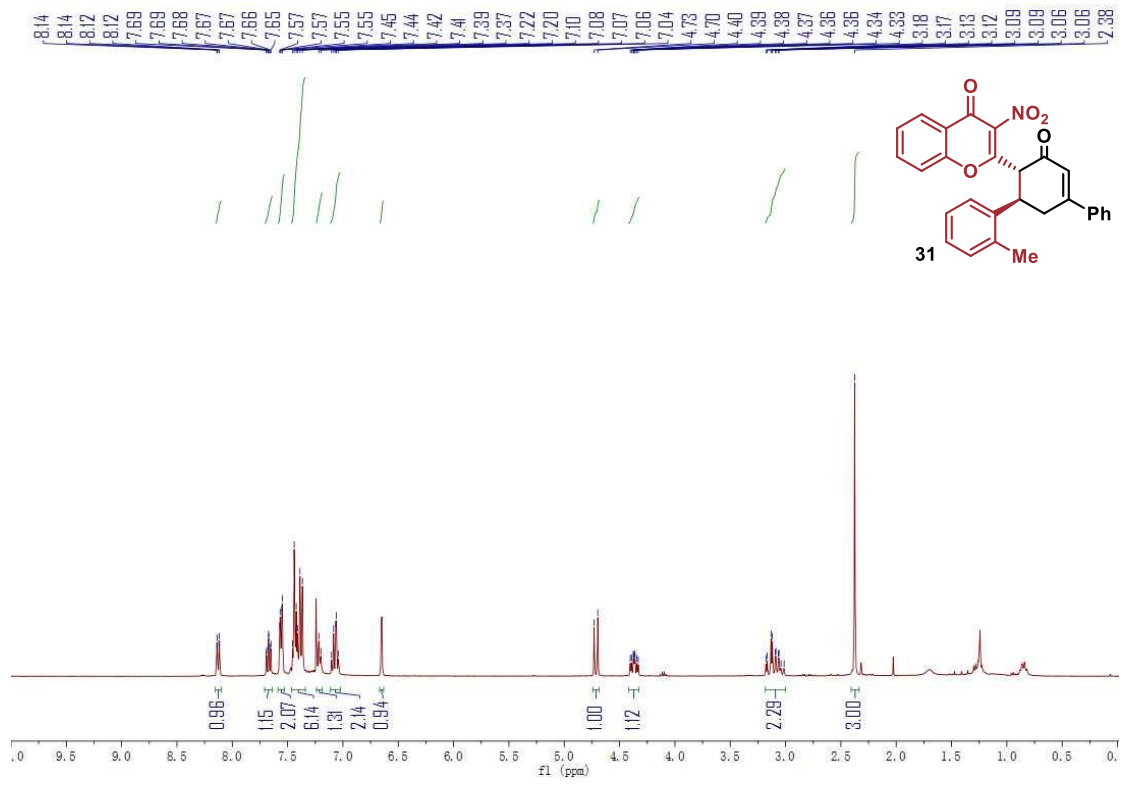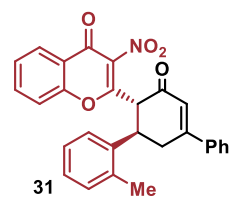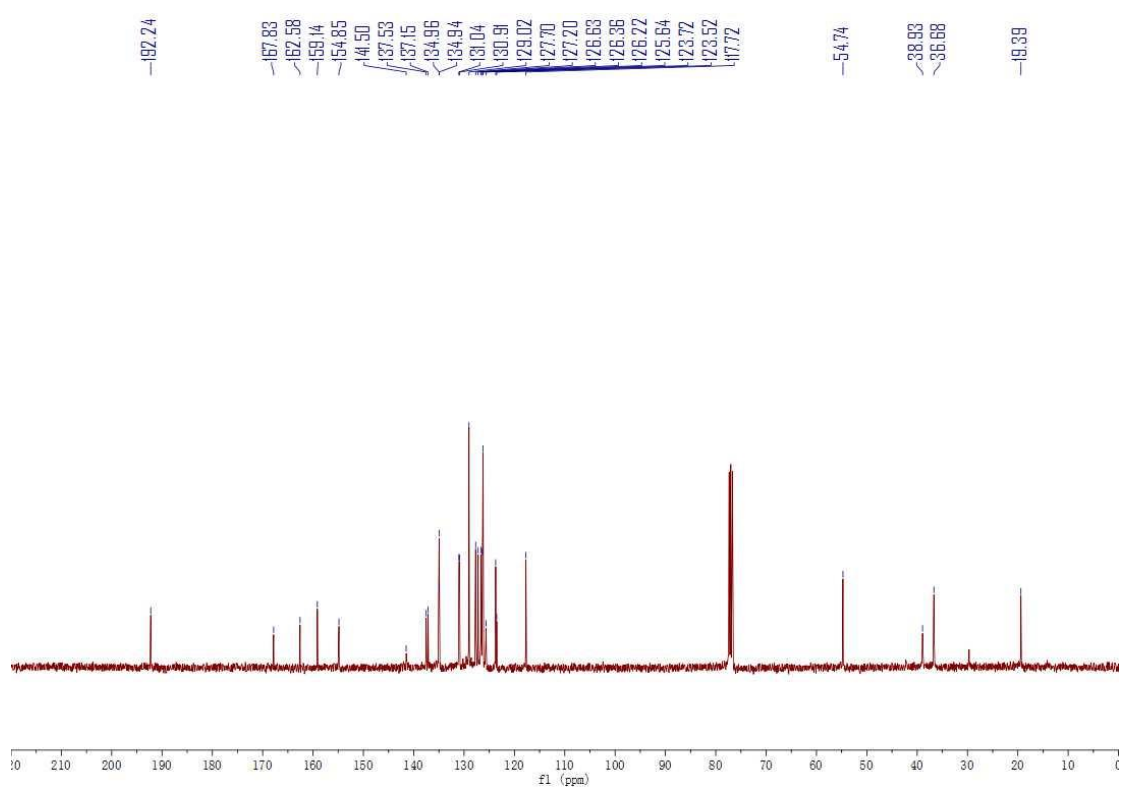

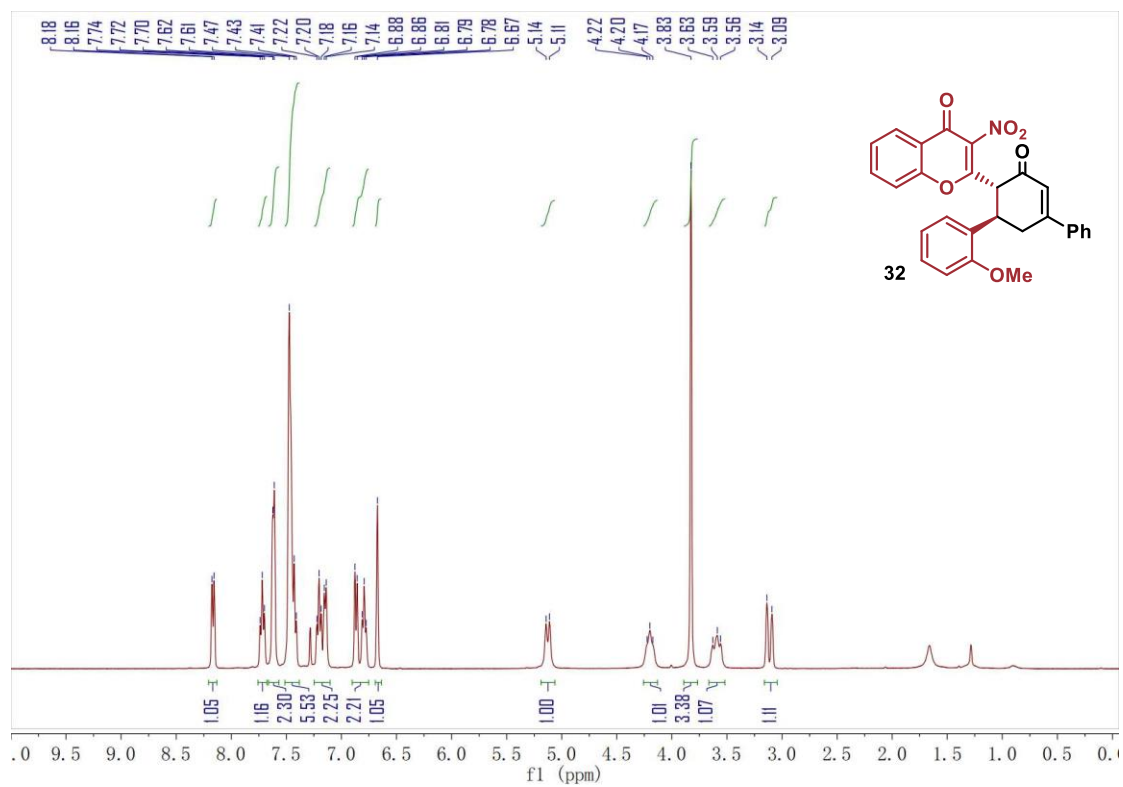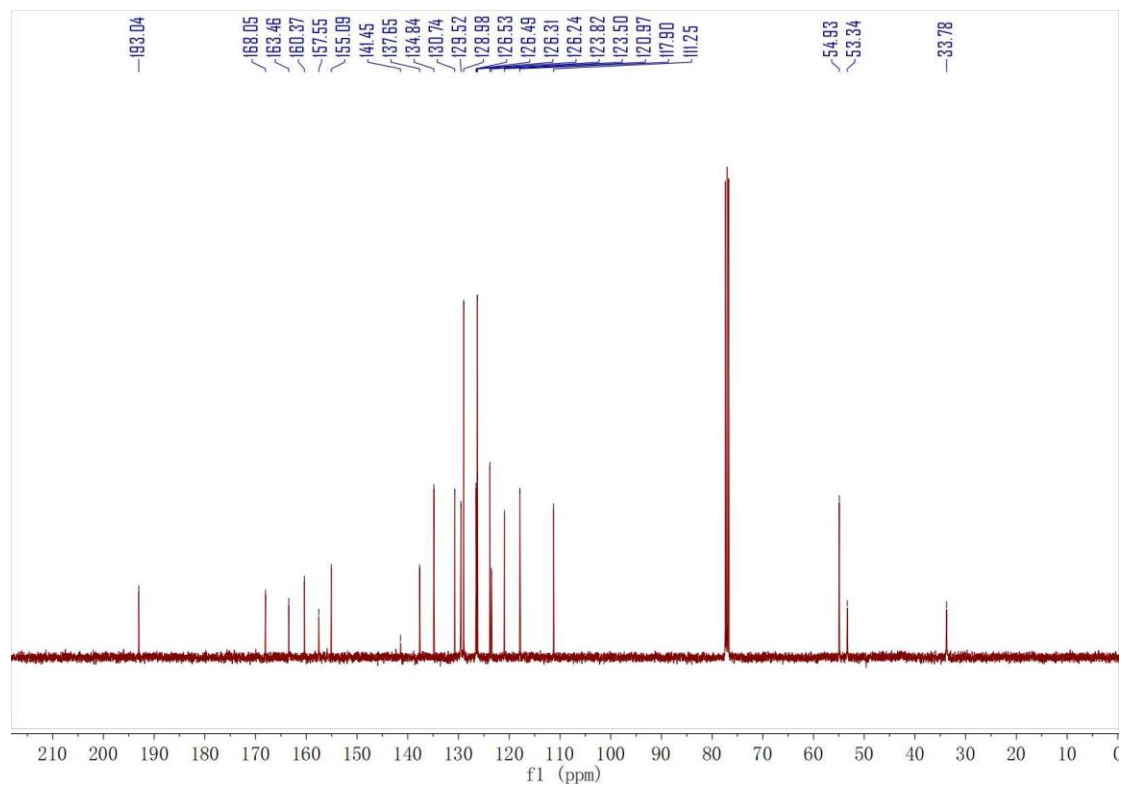

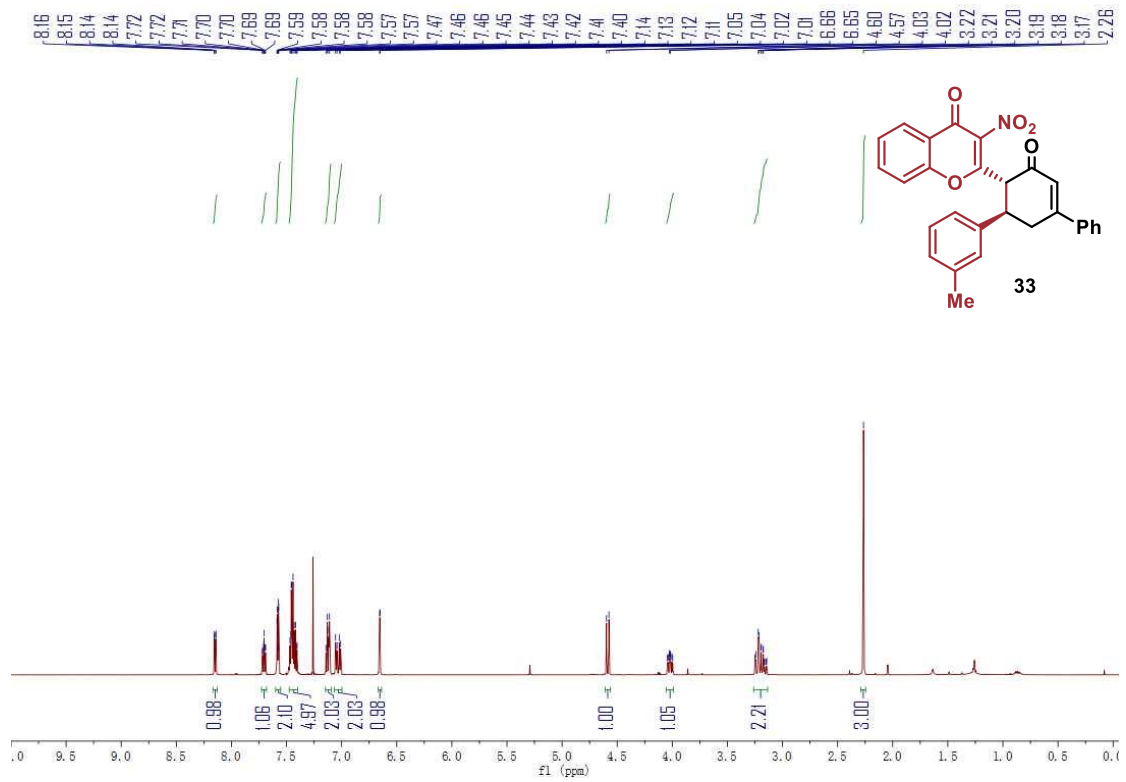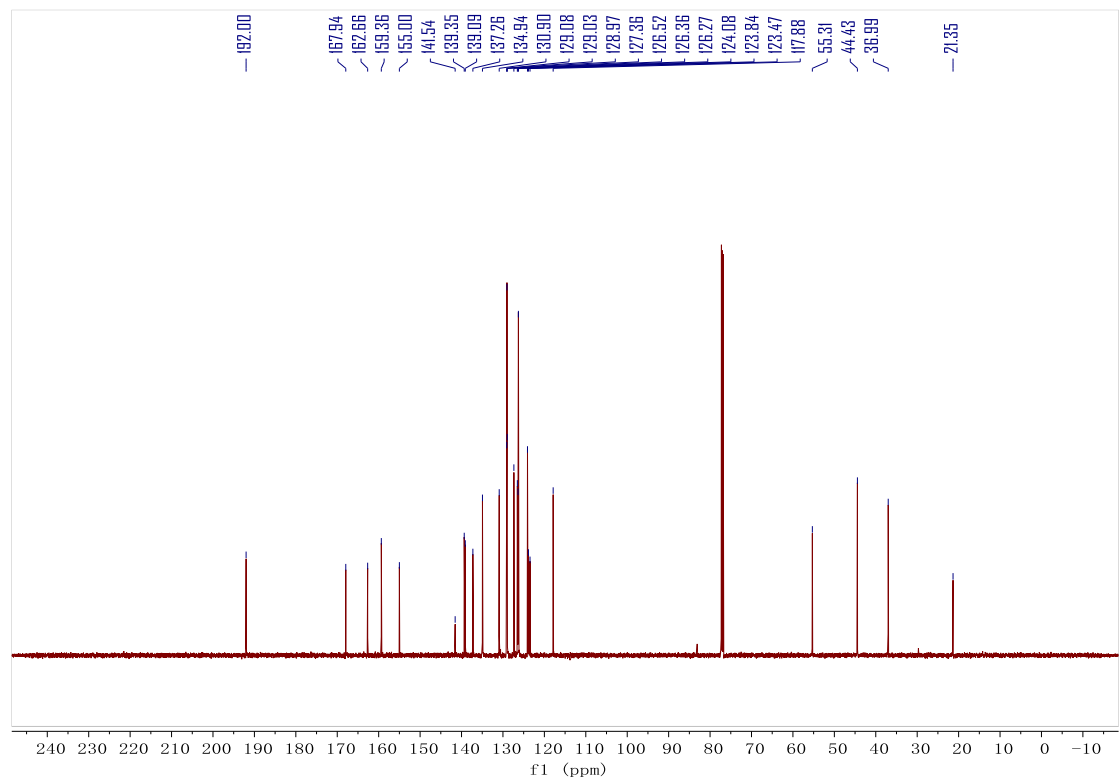



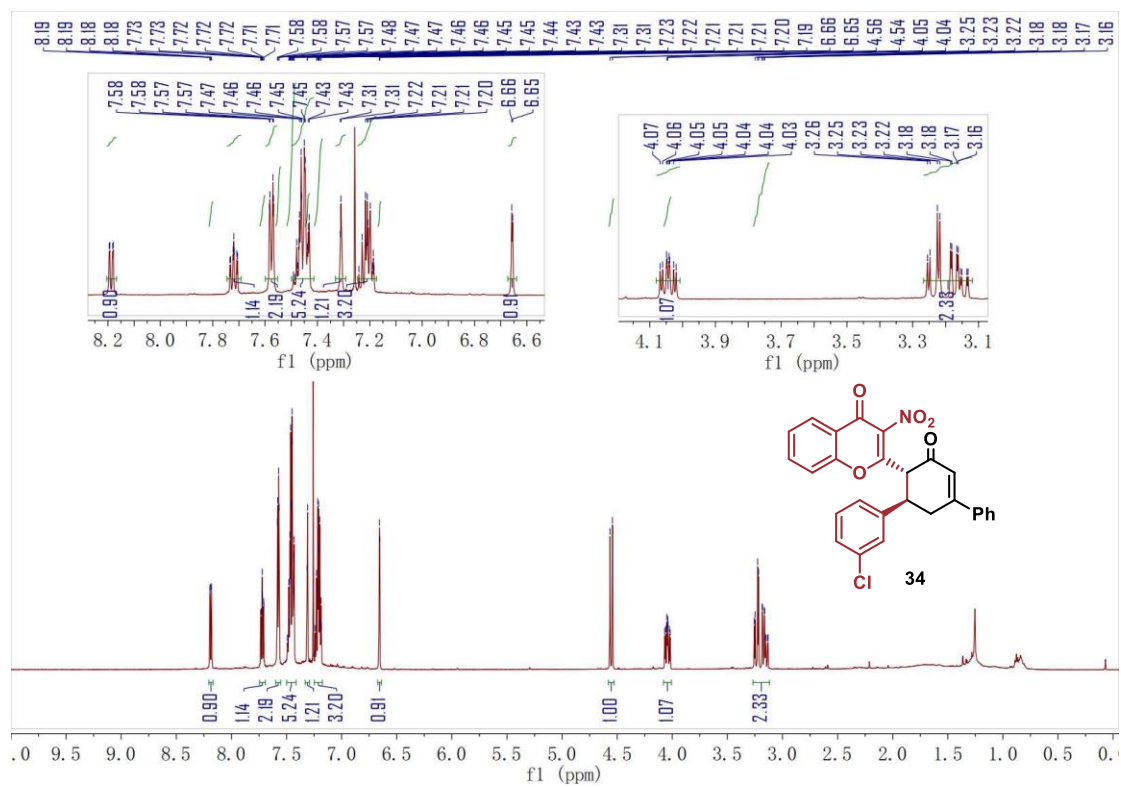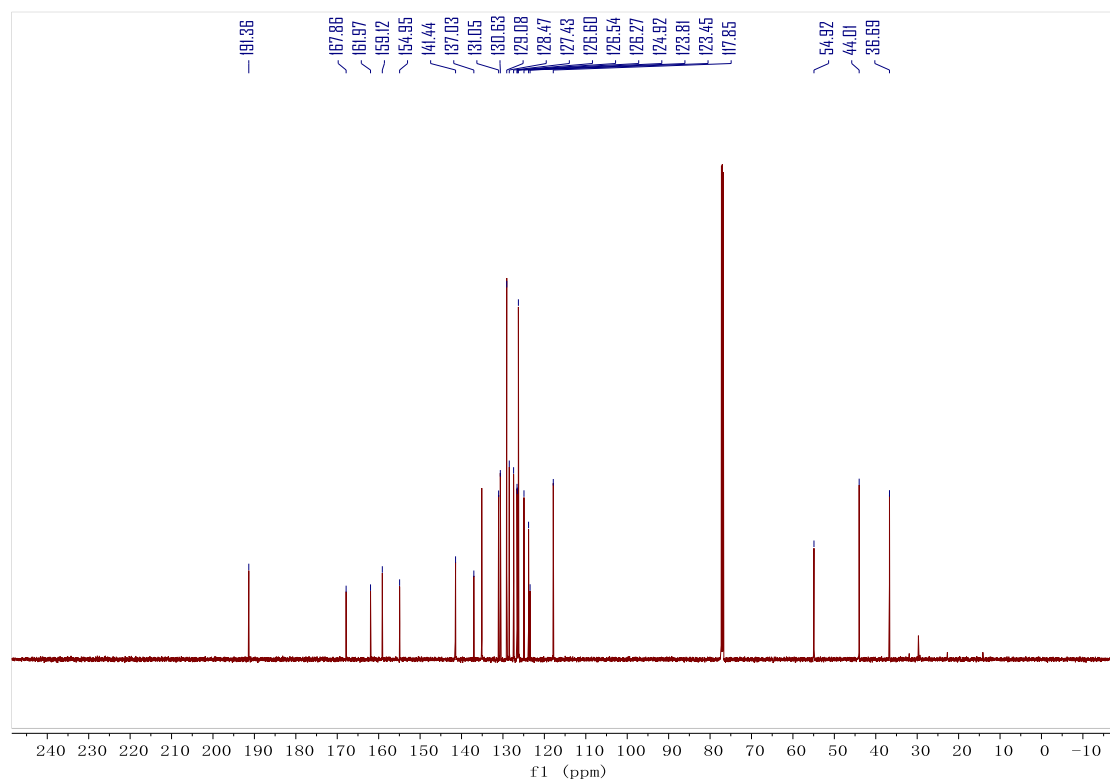

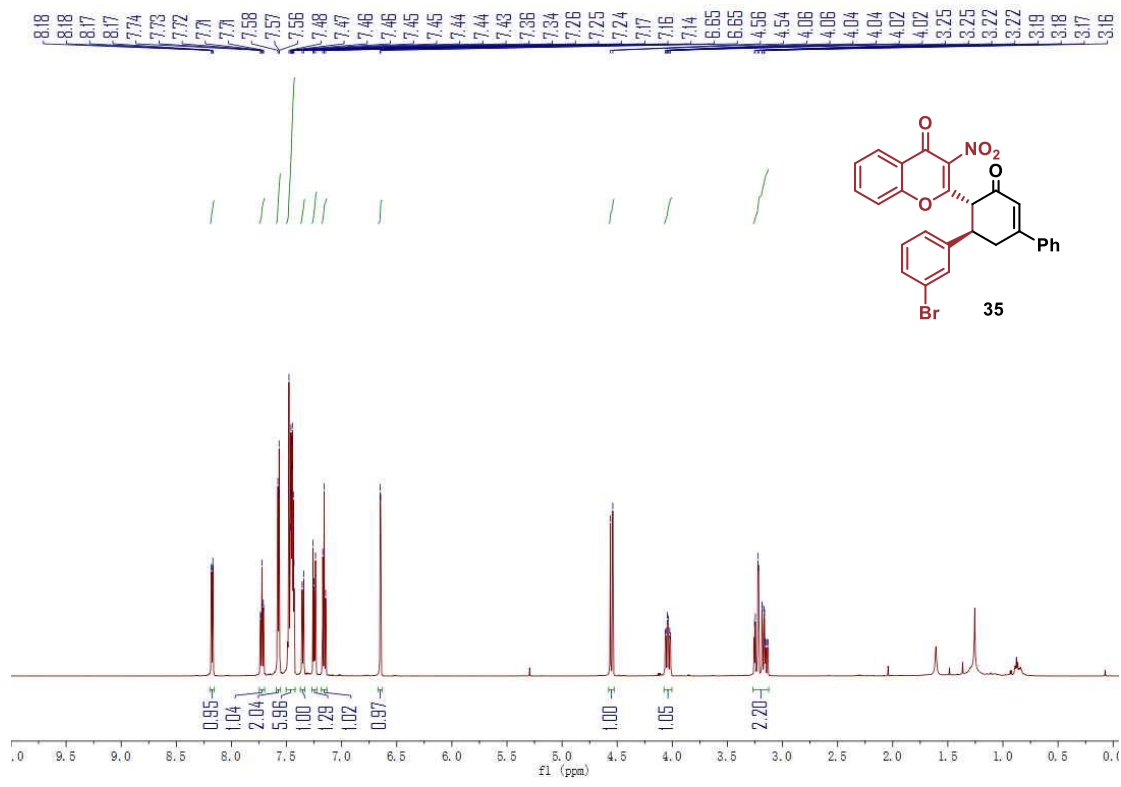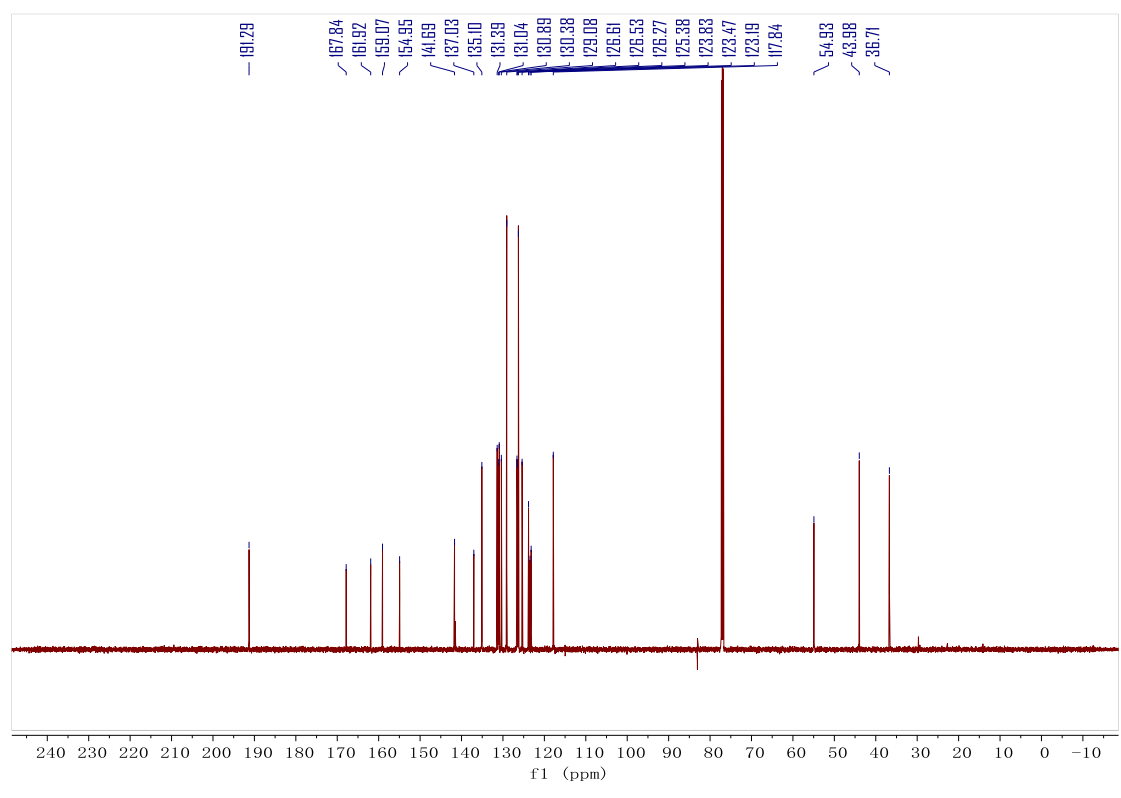

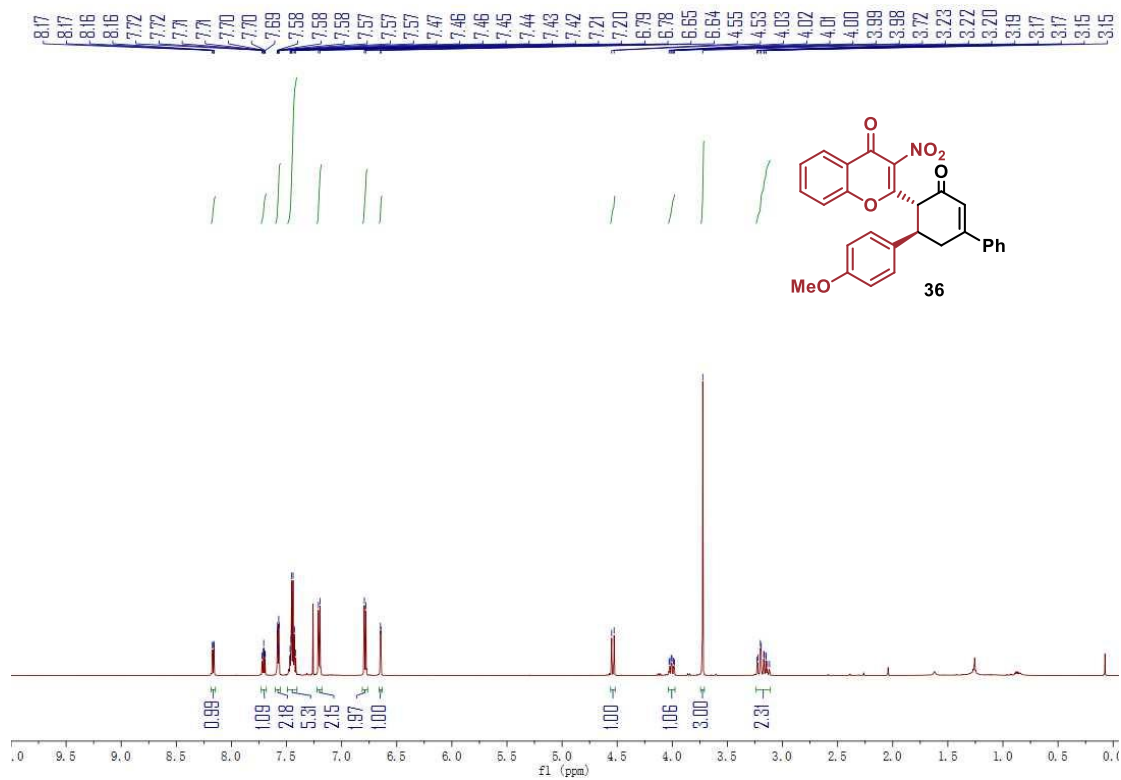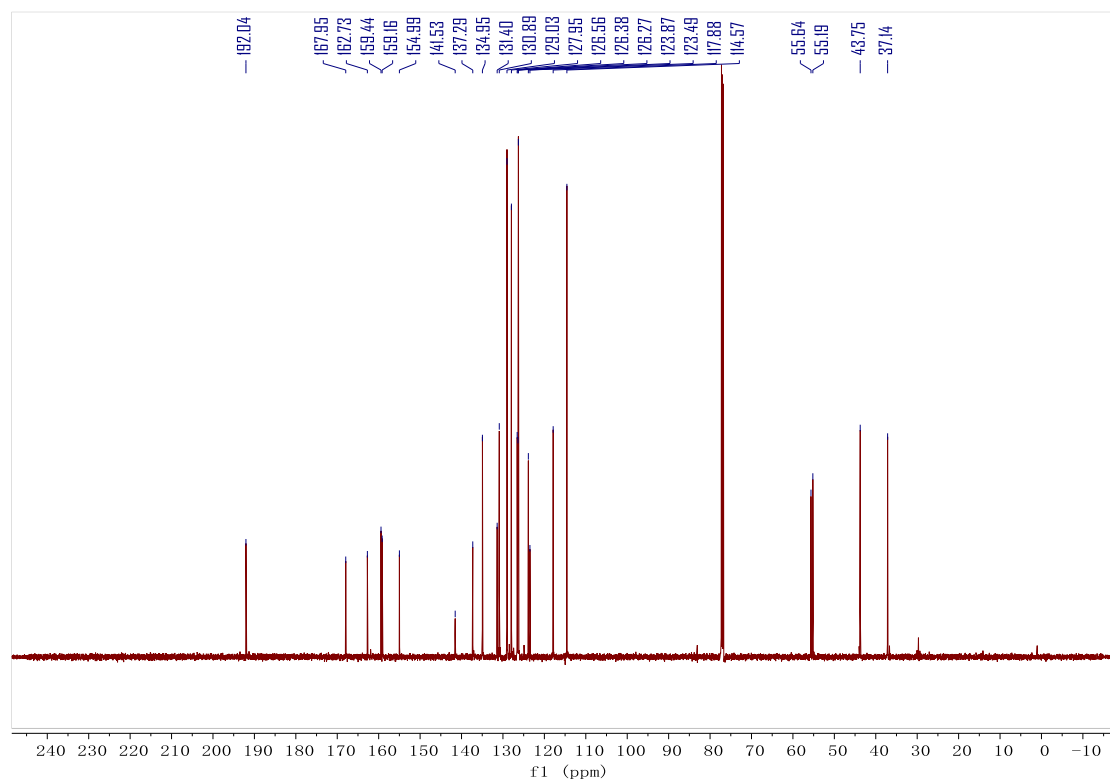

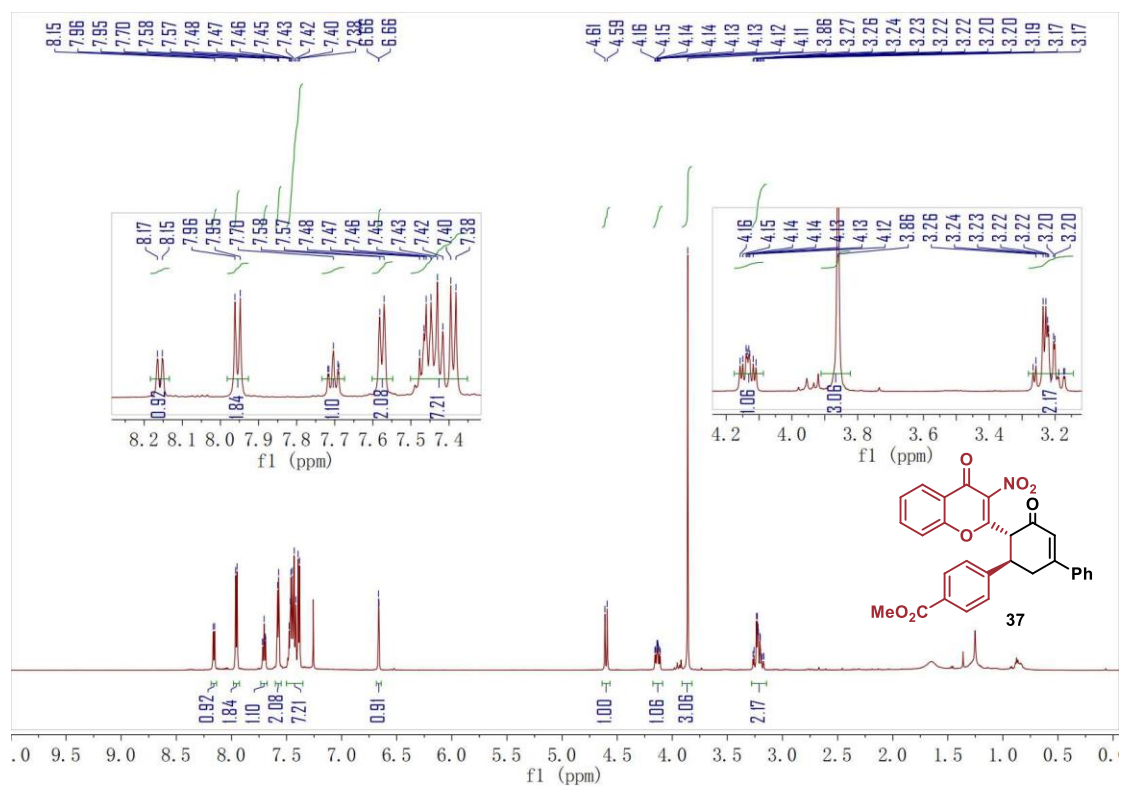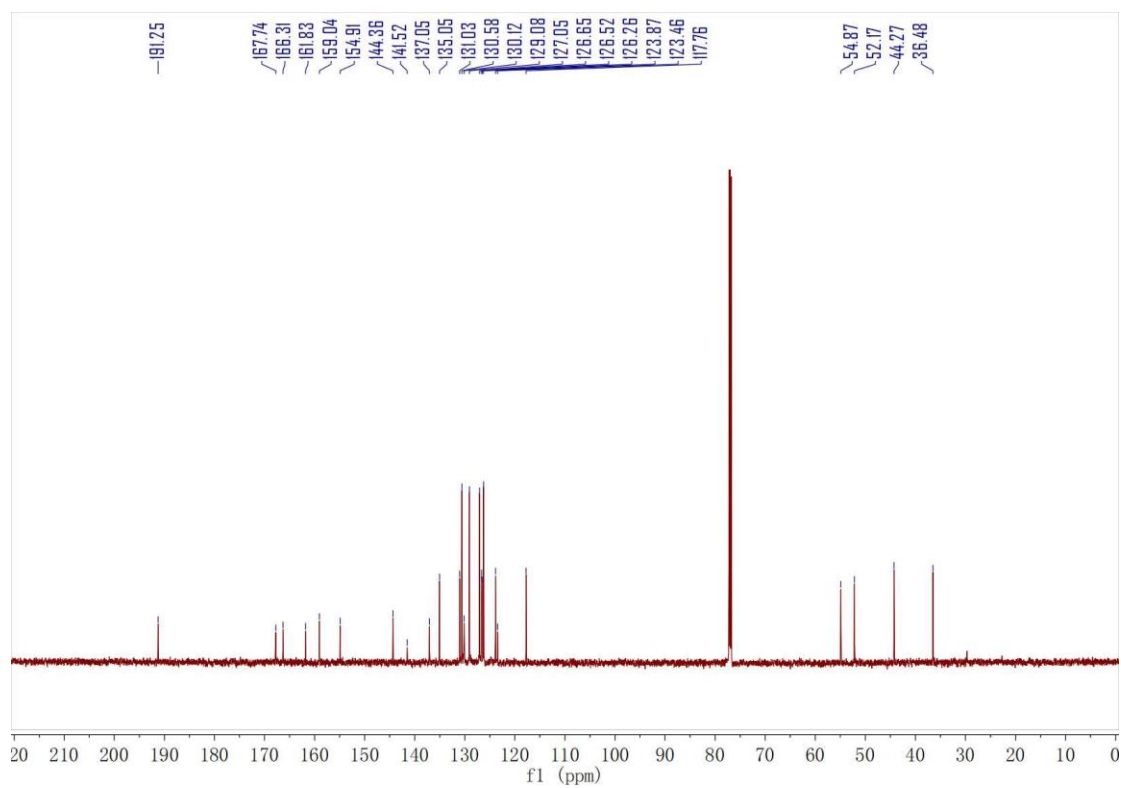

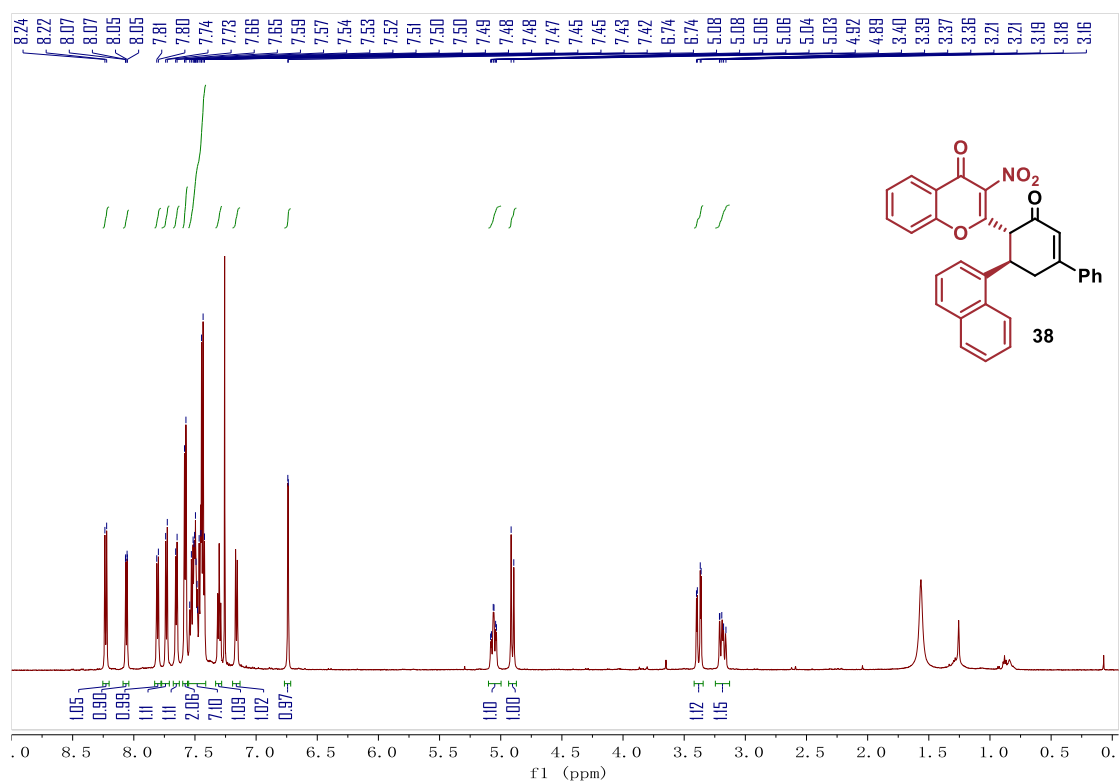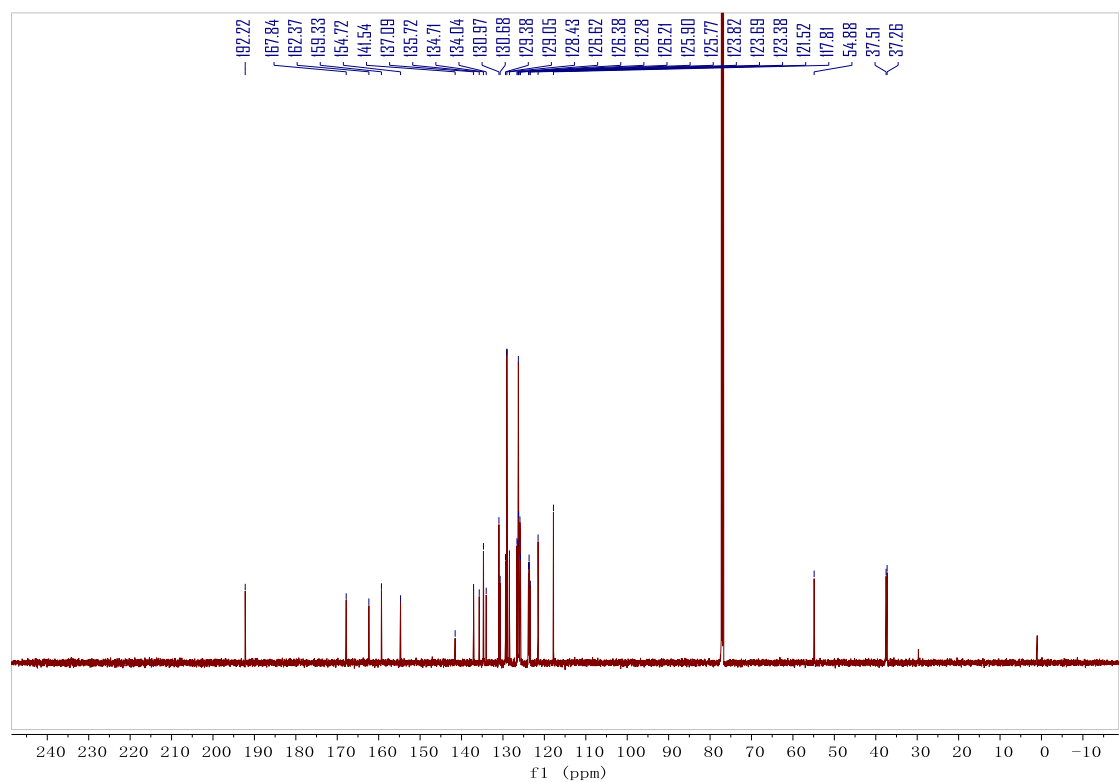

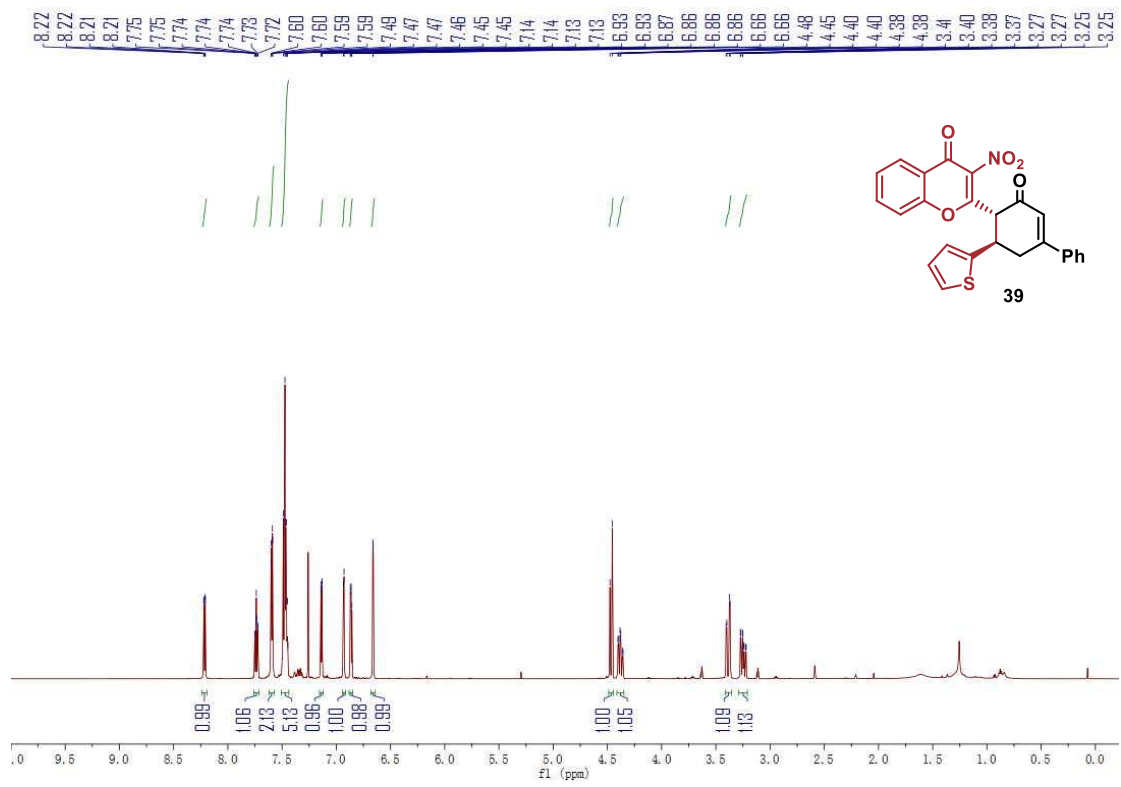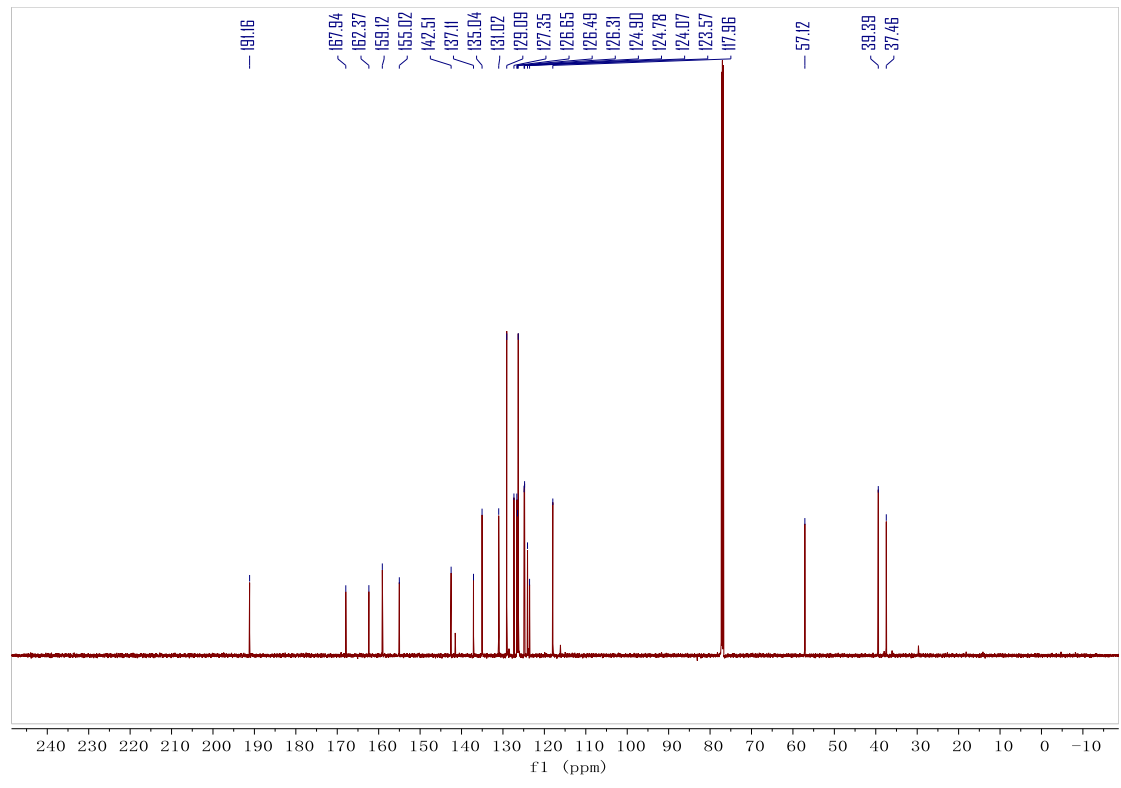

## 5 HPLC Data

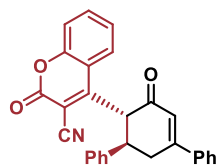

4

Sample Info: Mobile phase: n-Hexane/EtOH 7:3;  
The sample is solved in MP

Methode file: IC.M  
Column-info: Chiralpak IC (150x4,6)mm  
Operator: Analytical Lab 4.03 - 4.04

Injektion Time: 15:09:24  
Injektion Date: 30.07.2019

Instrument Conditions: At Start At Stop  
Temperature in °C: 30.0 30.0  
Pressure in bar: 32.4 32.5  
Flow in ml/min: 1.00 1.00

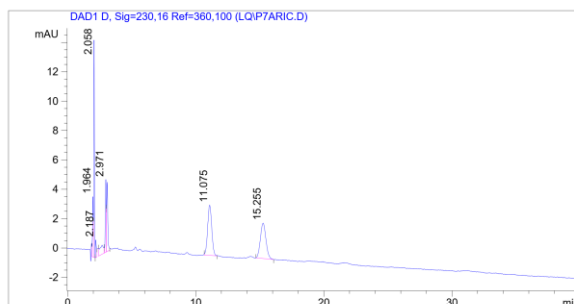

| #     | Ret. Time (min) | Width | Height (mAU) | Area (mAU*s) | Area % |
|-------|-----------------|-------|--------------|--------------|--------|
| 1     | 1.96            | 0.06  | 4.10         | 17.14        | 5.85   |
| 2     | 2.06            | 0.06  | 14.81        | 53.16        | 18.14  |
| 3     | 2.19            | 0.07  | 1.21         | 6.35         | 2.17   |
| 4     | 2.68            | 0.26  | 0.62         | 12.92        | 4.41   |
| 5     | 2.97            | 0.08  | 4.95         | 26.52        | 9.05   |
| 6     | 3.08            | 0.09  | 4.72         | 28.30        | 9.65   |
| 7     | 11.08           | 0.34  | 3.43         | 75.96        | 25.92  |
| 8     | 15.25           | 0.43  | 2.42         | 72.71        | 24.81  |
| Total |                 |       |              | 293.07       | 100.00 |

Methode file: IC.M  
Column-info: Chiralpak IC (150x4,6)mm  
Operator: Analytical Lab 4.03 - 4.04

Injektion Time: 11:36:25  
Injektion Date: 31.07.2019

Instrument Conditions: At Start At Stop  
Temperature in °C: 30.0 30.0  
Pressure in bar: 32.4 33.3  
Flow in ml/min: 1.00 1.00

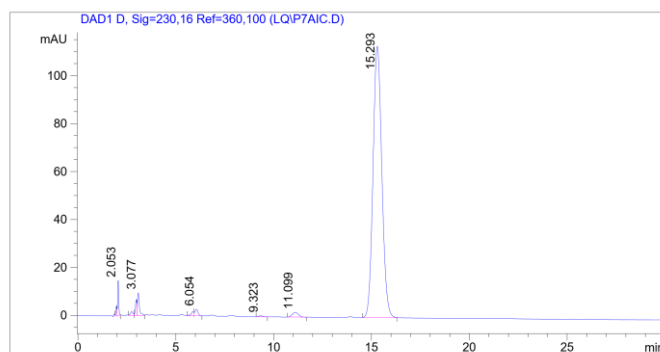

| #     | Ret. Time (min) | Width | Height (mAU) | Area (mAU*s) | Area % |
|-------|-----------------|-------|--------------|--------------|--------|
| 1     | 1.96            | 0.06  | 4.02         | 16.38        | 0.43   |
| 2     | 2.05            | 0.06  | 14.77        | 56.29        | 1.47   |
| 3     | 2.74            | 0.14  | 1.69         | 16.37        | 0.43   |
| 4     | 2.97            | 0.08  | 6.52         | 32.98        | 0.86   |
| 5     | 3.08            | 0.10  | 9.41         | 66.62        | 1.74   |
| 6     | 5.87            | 0.15  | 1.63         | 16.01        | 0.42   |
| 7     | 6.05            | 0.16  | 2.66         | 28.22        | 0.74   |
| 8     | 9.32            | 0.20  | 0.40         | 5.94         | 0.16   |
| 9     | 11.10           | 0.32  | 1.97         | 43.08        | 1.13   |
| 10    | 15.29           | 0.48  | 113.23       | 3537.95      | 92.62  |
| Total |                 |       |              | 3819.83      | 100.00 |

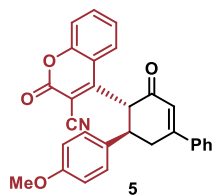

Sample Info: Mobile phase: n-Hexane/EtOH 7:3;  
The sample is solved in MP

Methode file: IC.M  
Column-info: Chiralpak IC (150x4,6)mm  
Operator: Analytical Lab 4.03 - 4.04

Injektion Time: 10:10:56  
Injektion Date: 26.07.2019

Instrument Conditions: At Start At Stop  
Temperature in°C: 30.0 30.0  
Pressure in bar: 31.7 32.5  
Flow in ml/min: 1.00 1.00

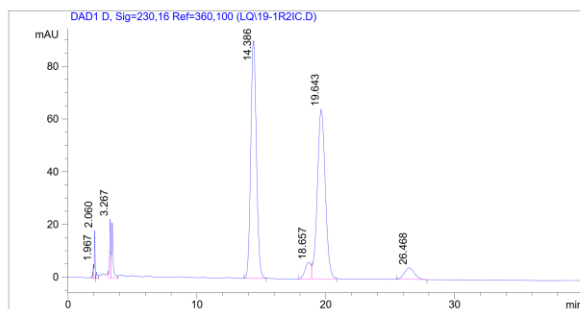

| #     | Ret. Time (min) | Width | Height (mAU) | Area (mAU*s) | Area % |
|-------|-----------------|-------|--------------|--------------|--------|
| 1     | 1.97            | 0.06  | 5.43         | 22.88        | 0.36   |
| 2     | 2.06            | 0.06  | 18.15        | 71.14        | 1.12   |
| 3     | 2.19            | 0.09  | 2.46         | 15.85        | 0.25   |
| 4     | 3.27            | 0.10  | 22.36        | 141.50       | 2.23   |
| 5     | 3.42            | 0.11  | 20.94        | 163.64       | 2.58   |
| 6     | 14.39           | 0.47  | 90.31        | 2727.01      | 43.02  |
| 7     | 18.66           | 0.48  | 6.20         | 201.19       | 3.17   |
| 8     | 19.64           | 0.67  | 64.38        | 2758.27      | 43.52  |
| 9     | 26.47           | 0.65  | 4.38         | 237.10       | 3.74   |
| Total |                 |       |              | 6338.57      | 100.00 |

Methode file: IC.M  
Column-info: Chiralpak IC (150x4,6)mm  
Operator: Analytical Lab 4.03 - 4.04

Injektion Time: 14:18:22  
Injektion Date: 26.07.2019

Instrument Conditions: At Start At Stop  
Temperature in°C: 30.0 30.0  
Pressure in bar: 31.6 32.1  
Flow in ml/min: 1.00 1.00

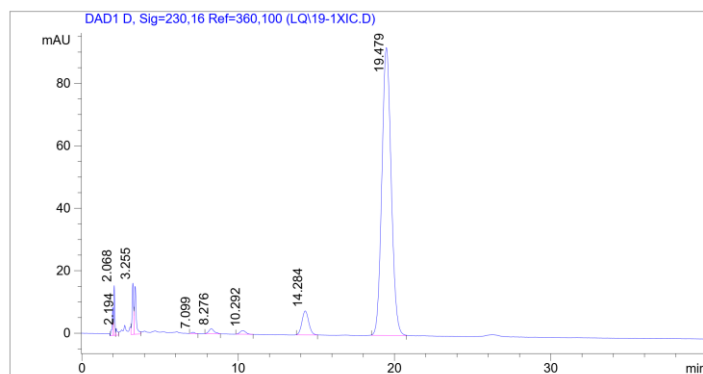

| #     | Ret. Time (min) | Width | Height (mAU) | Area (mAU*s) | Area % |
|-------|-----------------|-------|--------------|--------------|--------|
| 1     | 1.97            | 0.07  | 8.92         | 43.61        | 0.97   |
| 2     | 2.07            | 0.06  | 15.95        | 68.34        | 1.52   |
| 3     | 2.19            | 0.10  | 2.09         | 15.21        | 0.34   |
| 4     | 3.25            | 0.10  | 16.42        | 106.10       | 2.36   |
| 5     | 3.41            | 0.12  | 15.33        | 123.46       | 2.75   |
| 6     | 7.10            | 0.19  | 0.40         | 5.08         | 0.11   |
| 7     | 8.28            | 0.34  | 1.61         | 38.71        | 0.86   |
| 8     | 10.29           | 0.36  | 1.18         | 30.17        | 0.67   |
| 9     | 14.28           | 0.46  | 7.69         | 231.48       | 5.15   |
| 10    | 19.48           | 0.64  | 92.17        | 3829.39      | 85.26  |
| Total |                 |       |              | 4491.55      | 100.00 |



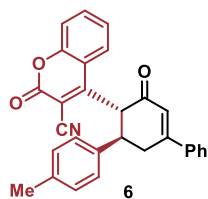

Sample Info: Mobile phase: n-Hexane/EtOH 7:3;  
The sample is solved in MP

Methode file: IC.M  
Column-info: Chiralpak IC (150x4,6)mm  
Operator: Analytical Lab 4.03 - 4.04

Injektion Time: 09:31:29  
Injektion Date: 31.07.2019

Instrument Conditions: At Start At Stop  
Temperature in°C: 30.0 30.0  
Pressure in bar: 32.9 33.7  
Flow in ml/min: 1.00 1.00

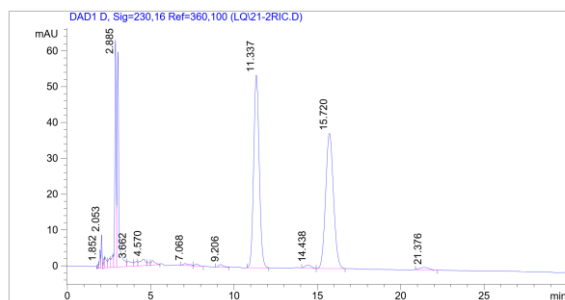

| #     | Ret. Time (min) | Width | Height (mAU) | Area (mAU*s) | Area % |
|-------|-----------------|-------|--------------|--------------|--------|
| 1     | 1.85            | 0.05  | 1.20         | 3.92         | 0.11   |
| 2     | 1.96            | 0.07  | 5.15         | 22.65        | 0.63   |
| 3     | 2.05            | 0.06  | 9.33         | 36.73        | 1.02   |
| 4     | 2.19            | 0.05  | 2.57         | 9.09         | 0.25   |
| 5     | 2.27            | 0.12  | 2.95         | 25.81        | 0.72   |
| 6     | 2.52            | 0.14  | 2.63         | 27.06        | 0.75   |
| 7     | 2.72            | 0.11  | 3.50         | 29.49        | 0.82   |
| 8     | 2.88            | 0.08  | 63.55        | 334.24       | 9.31   |
| 9     | 3.03            | 0.10  | 60.08        | 414.59       | 11.55  |
| 10    | 3.66            | 0.26  | 1.43         | 28.60        | 0.80   |
| 11    | 4.13            | 0.18  | 1.31         | 17.30        | 0.48   |
| 12    | 4.57            | 0.33  | 1.83         | 43.45        | 1.21   |
| 13    | 4.88            | 0.15  | 0.75         | 8.67         | 0.24   |
| 14    | 5.12            | 0.23  | 1.33         | 22.02        | 0.61   |
| 15    | 7.07            | 0.32  | 0.56         | 13.73        | 0.38   |
| 16    | 7.75            | 0.24  | 0.59         | 10.05        | 0.28   |
| 17    | 9.21            | 0.26  | 0.71         | 14.02        | 0.39   |
| 18    | 11.34           | 0.36  | 53.79        | 1243.44      | 34.63  |
| 19    | 14.44           | 0.33  | 0.85         | 21.28        | 0.59   |
| 20    | 15.72           | 0.51  | 37.77        | 1237.98      | 34.48  |
| 21    | 21.38           | 0.48  | 0.65         | 26.02        | 0.72   |
| Total |                 |       |              | 3590.13      | 100.00 |

Methode file: IC.M  
Column-info: Chiralpak IC (150x4,6)mm  
Operator: Analytical Lab 4.03 - 4.04

Injektion Time: 08:09:02  
Injektion Date: 31.07.2019

Instrument Conditions: At Start At Stop  
Temperature in°C: 30.0 30.0  
Pressure in bar: 32.8 33.4  
Flow in ml/min: 1.00 1.00

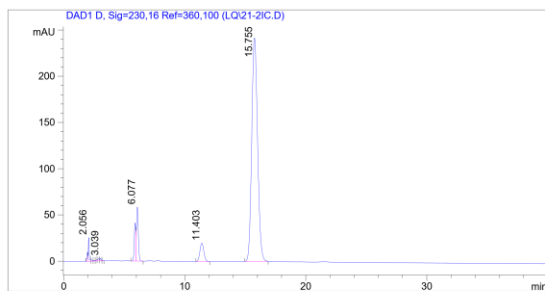

| #     | Ret. Time (min) | Width | Height (mAU) | Area (mAU*s) | Area % |
|-------|-----------------|-------|--------------|--------------|--------|
| 1     | 1.96            | 0.07  | 10.22        | 52.12        | 0.53   |
| 2     | 2.06            | 0.07  | 25.76        | 119.63       | 1.22   |
| 3     | 2.30            | 0.09  | 1.52         | 9.98         | 0.10   |
| 4     | 2.52            | 0.12  | 0.71         | 6.20         | 0.06   |
| 5     | 2.72            | 0.09  | 1.40         | 8.92         | 0.09   |
| 6     | 2.88            | 0.12  | 3.14         | 26.47        | 0.27   |
| 7     | 3.04            | 0.10  | 2.82         | 18.47        | 0.19   |
| 8     | 3.19            | 0.09  | 0.75         | 4.71         | 0.05   |
| 9     | 5.89            | 0.14  | 41.26        | 370.11       | 3.78   |
| 10    | 6.08            | 0.16  | 58.46        | 633.26       | 6.47   |
| 11    | 11.40           | 0.36  | 20.11        | 465.31       | 4.76   |
| 12    | 15.76           | 0.52  | 241.78       | 8070.47      | 82.47  |
| Total |                 |       |              | 9785.66      | 100.00 |

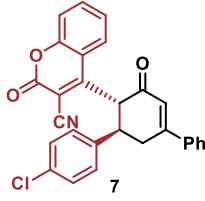

Sample Info: Mobile phase: n-Hexane/EtOH 7:3;  
The sample is solved in MP

Methode file: IC.M  
Column-info: Chiralpak IC (150x4,6)mm  
Operator: Analytical Lab 4.03 - 4.04

Injektion Time: 11:43:09  
Injektion Date: 30.07.2019

Instrument Conditions: At Start At Stop  
Temperature in°C: 30.0 30.0  
Pressure in bar: 32.4 33.0  
Flow in ml/min: 1.00 1.00

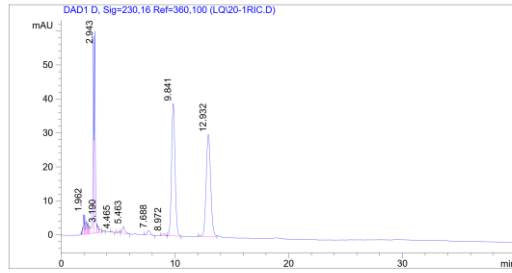

| #     | Ret. Time (min) | Width | Height (mAU) | Area (mAU*s) | Area % |
|-------|-----------------|-------|--------------|--------------|--------|
| 1     | 1.85            | 0.07  | 1.87         | 8.57         | 0.33   |
| 2     | 1.96            | 0.07  | 5.97         | 27.89        | 1.09   |
| 3     | 2.06            | 0.06  | 5.66         | 25.45        | 0.99   |
| 4     | 2.19            | 0.09  | 3.75         | 21.86        | 0.85   |
| 5     | 2.30            | 0.08  | 2.70         | 15.72        | 0.61   |
| 6     | 2.40            | 0.09  | 2.25         | 13.97        | 0.55   |
| 7     | 2.82            | 0.08  | 58.27        | 321.51       | 12.55  |
| 8     | 2.94            | 0.09  | 59.69        | 353.81       | 13.81  |
| 9     | 3.19            | 0.09  | 2.18         | 13.59        | 0.53   |
| 10    | 3.33            | 0.16  | 0.94         | 11.72        | 0.46   |
| 11    | 3.65            | 0.17  | 0.42         | 5.67         | 0.22   |
| 12    | 4.47            | 0.13  | 0.31         | 2.73         | 0.11   |
| 13    | 5.05            | 0.18  | 0.49         | 6.12         | 0.24   |
| 14    | 5.46            | 0.24  | 2.04         | 34.22        | 1.34   |
| 15    | 7.69            | 0.31  | 1.34         | 27.24        | 1.06   |
| 16    | 8.97            | 0.26  | 0.60         | 10.75        | 0.42   |
| 17    | 9.84            | 0.33  | 38.99        | 834.12       | 32.55  |
| 18    | 12.93           | 0.43  | 29.99        | 827.35       | 32.29  |
| Total |                 |       |              | 2562.27      | 100.00 |

Methode file: IC.M  
Column-info: Chiralpak IC (150x4,6)mm  
Operator: Analytical Lab 4.03 - 4.04

Injektion Time: 08:50:14  
Injektion Date: 31.07.2019

Instrument Conditions: At Start At Stop  
Temperature in°C: 30.0 30.0  
Pressure in bar: 32.8 33.7  
Flow in ml/min: 1.00 1.00

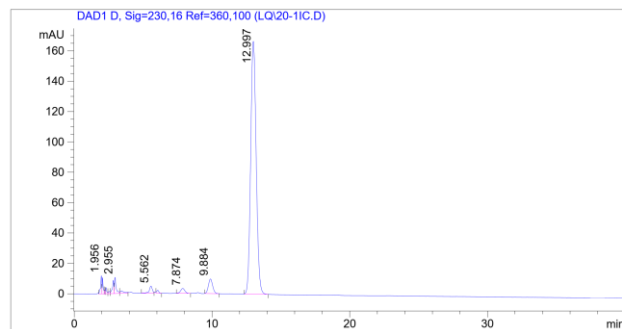

| #     | Ret. Time (min) | Width | Height (mAU) | Area (mAU*s) | Area % |
|-------|-----------------|-------|--------------|--------------|--------|
| 1     | 1.96            | 0.08  | 11.98        | 63.96        | 1.20   |
| 2     | 2.05            | 0.07  | 10.59        | 49.37        | 0.92   |
| 3     | 2.20            | 0.06  | 2.37         | 10.01        | 0.19   |
| 4     | 2.30            | 0.08  | 4.12         | 24.77        | 0.46   |
| 5     | 2.53            | 0.10  | 1.52         | 11.29        | 0.21   |
| 6     | 2.83            | 0.11  | 8.70         | 65.83        | 1.23   |
| 7     | 2.96            | 0.12  | 10.61        | 89.43        | 1.67   |
| 8     | 3.42            | 0.25  | 1.74         | 34.47        | 0.64   |
| 9     | 5.56            | 0.23  | 4.70         | 72.87        | 1.36   |
| 10    | 6.06            | 0.16  | 2.00         | 21.67        | 0.41   |
| 11    | 7.87            | 0.32  | 3.25         | 71.51        | 1.34   |
| 12    | 9.88            | 0.34  | 9.65         | 208.20       | 3.89   |
| 13    | 13.00           | 0.43  | 166.57       | 4624.96      | 86.47  |
| Total |                 |       |              | 5348.36      | 100.00 |

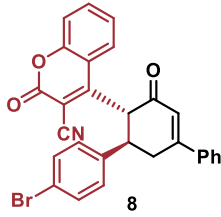

Sample Info: Mobile phase: n-Hexane/EtOH 7:3;  
The sample is solved in MP

Methode file: IC.M  
Column-info: Chiralpak IC (150x4,6)mm  
Operator: Analytical Lab 4.03 - 4.04

Injektion Time: 13:05:38  
Injektion Date: 30.07.2019

Instrument Conditions: At Start At Stop  
Temperature in°C: 30.0 30.0  
Pressure in bar: 32.6 33.0  
Flow in ml/min: 1.00 1.00

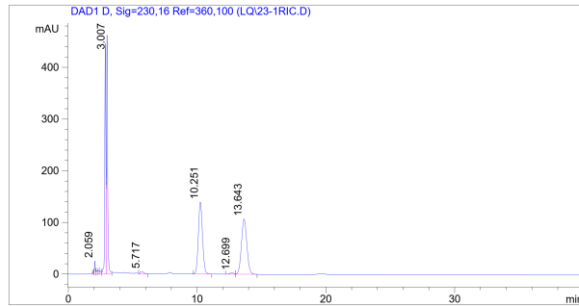

| #     | Ret. Time (min) | Width | Height (mAU) | Area (mAU*s) | Area % |
|-------|-----------------|-------|--------------|--------------|--------|
| 1     | 1.97            | 0.07  | 5.73         | 25.99        | 0.21   |
| 2     | 2.06            | 0.07  | 25.81        | 119.53       | 0.99   |
| 3     | 2.19            | 0.08  | 6.75         | 38.34        | 0.32   |
| 4     | 2.35            | 0.12  | 7.36         | 56.82        | 0.47   |
| 5     | 2.44            | 0.12  | 6.86         | 61.53        | 0.51   |
| 6     | 2.87            | 0.09  | 447.68       | 2556.05      | 21.13  |
| 7     | 3.01            | 0.09  | 463.34       | 2804.47      | 23.18  |
| 8     | 5.72            | 0.25  | 4.78         | 80.68        | 0.67   |
| 9     | 10.25           | 0.35  | 139.34       | 3137.88      | 25.94  |
| 10    | 12.70           | 0.39  | 2.33         | 58.90        | 0.49   |
| 11    | 13.64           | 0.46  | 107.21       | 3156.05      | 26.09  |
| Total |                 |       |              | 12096.24     | 100.00 |

Methode file: IC.M  
Column-info: Chiralpak IC (150x4,6)mm  
Operator: Analytical Lab 4.03 - 4.04

Injektion Time: 10:02:42  
Injektion Date: 31.07.2019

Instrument Conditions: At Start At Stop  
Temperature in°C: 30.0 30.0  
Pressure in bar: 32.8 33.3  
Flow in ml/min: 1.00 1.00

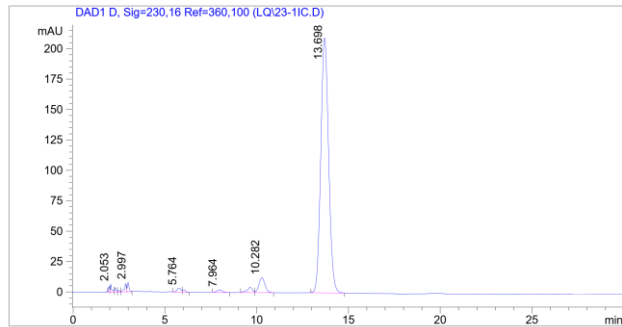

| #     | Ret. Time (min) | Width | Height (mAU) | Area (mAU*s) | Area % |
|-------|-----------------|-------|--------------|--------------|--------|
| 1     | 1.96            | 0.06  | 4.59         | 19.18        | 0.28   |
| 2     | 2.05            | 0.08  | 6.38         | 35.09        | 0.51   |
| 3     | 2.30            | 0.08  | 3.74         | 20.61        | 0.30   |
| 4     | 2.48            | 0.10  | 1.34         | 9.52         | 0.14   |
| 5     | 2.86            | 0.11  | 6.78         | 51.69        | 0.75   |
| 6     | 3.00            | 0.10  | 7.74         | 52.87        | 0.77   |
| 7     | 5.76            | 0.26  | 3.19         | 52.46        | 0.76   |
| 8     | 6.04            | 0.16  | 1.94         | 20.69        | 0.30   |
| 9     | 7.96            | 0.31  | 2.15         | 45.41        | 0.66   |
| 10    | 9.65            | 0.30  | 4.35         | 88.86        | 1.29   |
| 11    | 10.28           | 0.35  | 12.31        | 280.89       | 4.08   |
| 12    | 13.70           | 0.46  | 209.73       | 6203.89      | 90.16  |
| Total |                 |       |              | 6881.17      | 100.00 |

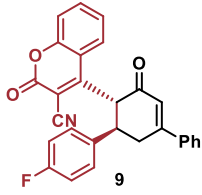

Sample Info: Mobile phase: n-Hexane/EtOH 7:3;  
The sample is solved in MP

Methode file: IC.M  
Column-info: Chiralpak IC (150x4,6)mm  
Operator: Analytical Lab 4.03 - 4.04

Injektion Time: 10:40:37  
Injektion Date: 30.07.2019

Instrument Conditions: At Start At Stop  
Temperature in°C: 30.0 30.0  
Pressure in bar: 32.7 33.5  
Flow in ml/min: 1.00 1.00

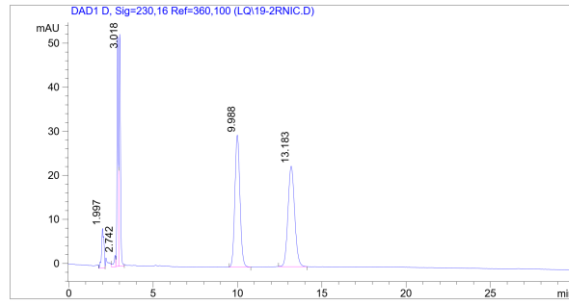

| #     | Ret. Time (min) | Width | Height (mAU) | Area (mAU*s) | Area % |
|-------|-----------------|-------|--------------|--------------|--------|
| 1     | 2.00            | 0.14  | 8.98         | 88.15        | 4.56   |
| 2     | 2.74            | 0.10  | 2.60         | 18.22        | 0.94   |
| 3     | 2.89            | 0.08  | 52.18        | 270.79       | 14.01  |
| 4     | 3.02            | 0.09  | 52.66        | 301.10       | 15.57  |
| 5     | 9.99            | 0.32  | 29.95        | 626.29       | 32.39  |
| 6     | 13.18           | 0.43  | 22.80        | 628.95       | 32.53  |
| Total |                 |       |              | 1933.50      | 100.00 |

Methode file: IC.M  
Column-info: Chiralpak IC (150x4,6)mm  
Operator: Analytical Lab 4.03 - 4.04

Injektion Time: 14:59:38  
Injektion Date: 26.07.2019

Instrument Conditions: At Start At Stop  
Temperature in°C: 30.0 30.0  
Pressure in bar: 31.5 32.3  
Flow in ml/min: 1.00 1.00

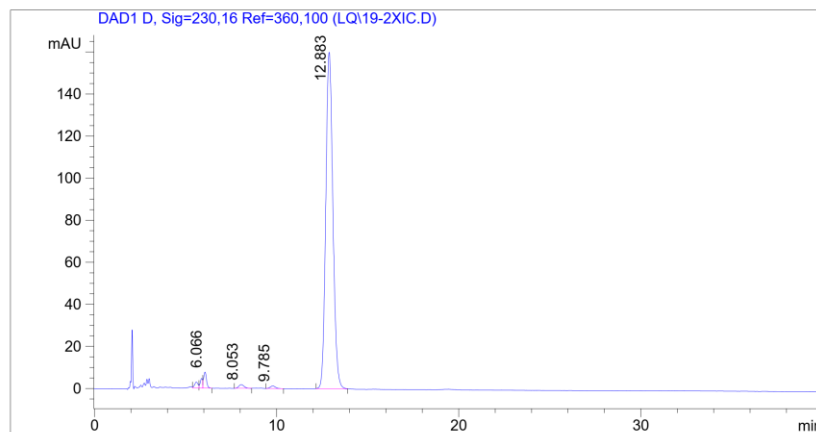

| #     | Ret. Time (min) | Width | Height (mAU) | Area (mAU*s) | Area % |
|-------|-----------------|-------|--------------|--------------|--------|
| 1     | 5.59            | 0.21  | 2.89         | 38.54        | 0.84   |
| 2     | 5.88            | 0.14  | 4.65         | 42.40        | 0.93   |
| 3     | 6.07            | 0.16  | 7.71         | 85.18        | 1.86   |
| 4     | 8.05            | 0.31  | 1.77         | 35.63        | 0.78   |
| 5     | 9.79            | 0.30  | 1.20         | 24.65        | 0.54   |
| 6     | 12.88           | 0.42  | 160.09       | 4341.88      | 95.04  |
| Total |                 |       |              | 4568.29      | 100.00 |

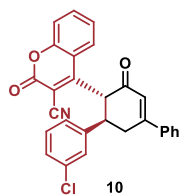

Sample Info: Mobile phase: n-Hexane/EtOH 7:3;  
The sample is solved in MP

Methode file: IC.M  
Column-info: Chiralpak IC (150x4,6)mm  
Operator: Analytical Lab 4.03 - 4.04

Injektion Time: 15:43:22  
Injektion Date: 05.08.2019

Instrument Conditions: At Start At Stop  
Temperature in °C: 30.0 30.0  
Pressure in bar: 33.1 33.6  
Flow in ml/min: 1.00 1.00

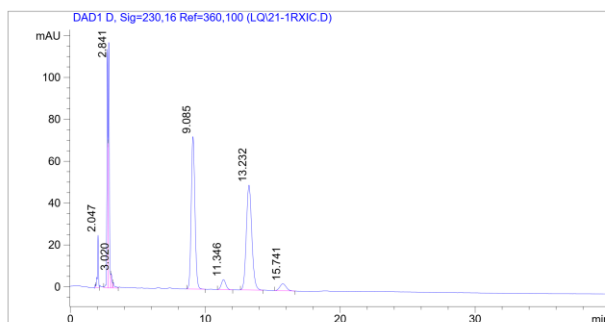

| #     | Ret. Time (min) | Width | Height (mAU) | Area (mAU*s) | Area % |
|-------|-----------------|-------|--------------|--------------|--------|
| 1     | 2.05            | 0.07  | 25.10        | 119.30       | 2.70   |
| 2     | 2.74            | 0.07  | 114.03       | 553.80       | 12.51  |
| 3     | 2.84            | 0.08  | 117.28       | 651.26       | 14.71  |
| 4     | 3.02            | 0.10  | 6.87         | 45.63        | 1.03   |
| 5     | 3.18            | 0.12  | 2.67         | 23.62        | 0.53   |
| 6     | 9.09            | 0.29  | 72.76        | 1390.04      | 31.41  |
| 7     | 11.35           | 0.36  | 4.79         | 110.60       | 2.50   |
| 8     | 13.23           | 0.44  | 50.07        | 1420.75      | 32.10  |
| 9     | 15.74           | 0.50  | 3.36         | 111.05       | 2.51   |
| Total |                 |       |              | 4426.04      | 100.00 |

Methode file: IC.M  
Column-info: Chiralpak IC (150x4,6)mm  
Operator: Analytical Lab 4.03 - 4.04

Injektion Time: 14:47:15  
Injektion Date: 05.08.2019

Instrument Conditions: At Start At Stop  
Temperature in °C: 30.0 30.0  
Pressure in bar: 32.5 33.1  
Flow in ml/min: 1.00 1.00

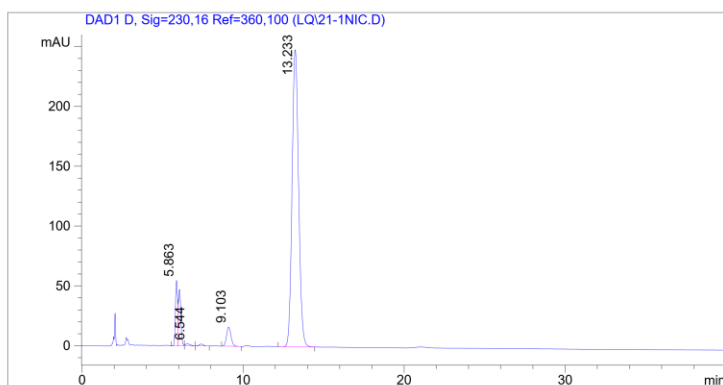

| #     | Ret. Time (min) | Width | Height (mAU) | Area (mAU*s) | Area % |
|-------|-----------------|-------|--------------|--------------|--------|
| 1     | 5.86            | 0.15  | 54.82        | 529.33       | 6.31   |
| 2     | 6.05            | 0.15  | 47.35        | 490.03       | 5.84   |
| 3     | 6.54            | 0.29  | 1.96         | 39.71        | 0.47   |
| 4     | 7.39            | 0.29  | 1.61         | 30.19        | 0.36   |
| 5     | 9.10            | 0.30  | 16.15        | 311.14       | 3.71   |
| 6     | 13.23           | 0.44  | 248.29       | 6984.38      | 83.30  |
| Total |                 |       |              | 8384.79      | 100.00 |

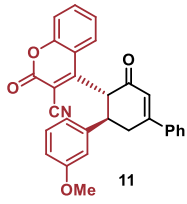

Sample Info: Mobile phase: n-Hexane/EtOH 7:3;  
The sample is solved in MP

Methode file: IC.M  
Column-info: Chiralpak IC (150x4,6)mm  
Operator: Analytical Lab 4.03 - 4.04

Injektion Time: 10:49:26  
Injektion Date: 06.08.2019

Instrument Conditions: At Start At Stop  
Temperature in °C: 30.0 30.0  
Pressure in bar: 32.2 33.0  
Flow in ml/min: 1.00 1.00

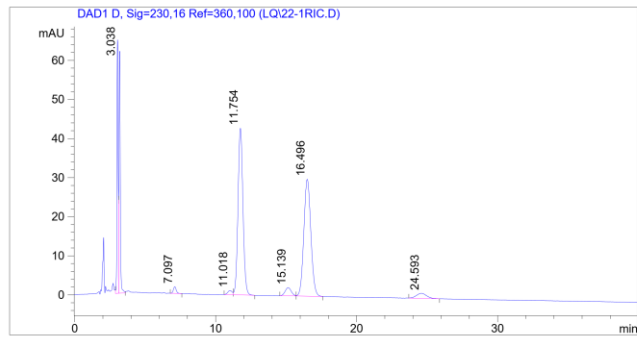

| #     | Ret. Time (min) | Width | Height (mAU) | Area (mAU*s) | Area % |
|-------|-----------------|-------|--------------|--------------|--------|
| 1     | 3.04            | 0.09  | 64.90        | 363.09       | 12.03  |
| 2     | 3.18            | 0.10  | 61.92        | 396.11       | 13.13  |
| 3     | 7.10            | 0.21  | 1.71         | 23.86        | 0.79   |
| 4     | 11.02           | 0.32  | 1.07         | 22.91        | 0.76   |
| 5     | 11.75           | 0.38  | 42.64        | 1042.46      | 34.55  |
| 6     | 15.14           | 0.46  | 2.11         | 64.36        | 2.13   |
| 7     | 16.50           | 0.54  | 29.91        | 1038.53      | 34.42  |
| 8     | 24.59           | 0.61  | 1.32         | 65.94        | 2.19   |
| Total |                 |       |              | 3017.27      | 100.00 |

Methode file: IC.M  
Column-info: Chiralpak IC (150x4,6)mm  
Operator: Analytical Lab 4.03 - 4.04

Injektion Time: 11:30:39  
Injektion Date: 06.08.2019

Instrument Conditions: At Start At Stop  
Temperature in °C: 30.0 30.0  
Pressure in bar: 32.2 33.0  
Flow in ml/min: 1.00 1.00

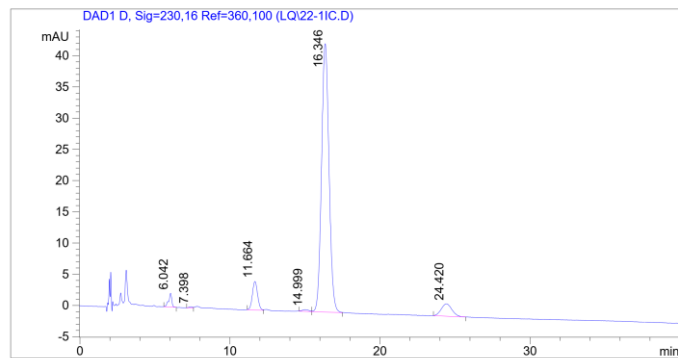

| #     | Ret. Time (min) | Width | Height (mAU) | Area (mAU*s) | Area % |
|-------|-----------------|-------|--------------|--------------|--------|
| 1     | 6.04            | 0.21  | 2.22         | 31.96        | 1.84   |
| 2     | 7.40            | 0.21  | 0.16         | 2.67         | 0.15   |
| 3     | 11.66           | 0.38  | 4.59         | 110.95       | 6.38   |
| 4     | 15.00           | 0.37  | 0.30         | 9.15         | 0.53   |
| 5     | 16.35           | 0.54  | 43.00        | 1485.89      | 85.41  |
| 6     | 24.42           | 0.64  | 1.99         | 99.06        | 5.69   |
| Total |                 |       |              | 1739.67      | 100.00 |

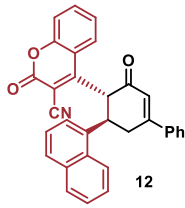

Sample Info: Mobile phase: n-Hexane/EtOH 7:3;  
The sample is solved in MP

Methode file: IC.M  
Column-info: Chiralpak IC (150x4,6)mm  
Operator: Analytical Lab 4.03 - 4.04

Injektion Time: 12:31:10  
Injektion Date: 08.08.2019

Instrument Conditions: At Start At Stop  
Temperature in °C: 30.0 30.0  
Pressure in bar: 32.9 33.1  
Flow in ml/min: 1.00 1.00

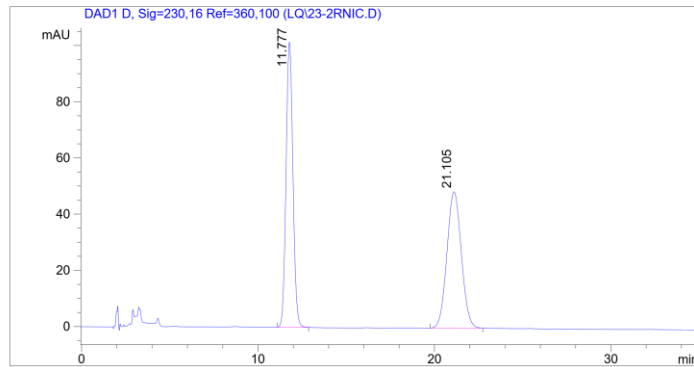

| #     | Ret. Time (min) | Width | Height (mAU) | Area (mAU*s) | Area % |
|-------|-----------------|-------|--------------|--------------|--------|
| 1     | 11.78           | 0.42  | 101.41       | 2736.84      | 49.87  |
| 2     | 21.10           | 0.88  | 48.54        | 2750.66      | 50.13  |
| Total |                 |       |              | 5487.50      | 100.00 |

Methode file: IC.M  
Column-info: Chiralpak IC (150x4,6)mm  
Operator: Analytical Lab 4.03 - 4.04

Injektion Time: 12:53:07  
Injektion Date: 06.08.2019

Instrument Conditions: At Start At Stop  
Temperature in °C: 30.0 30.0  
Pressure in bar: 32.1 33.4  
Flow in ml/min: 1.00 1.00

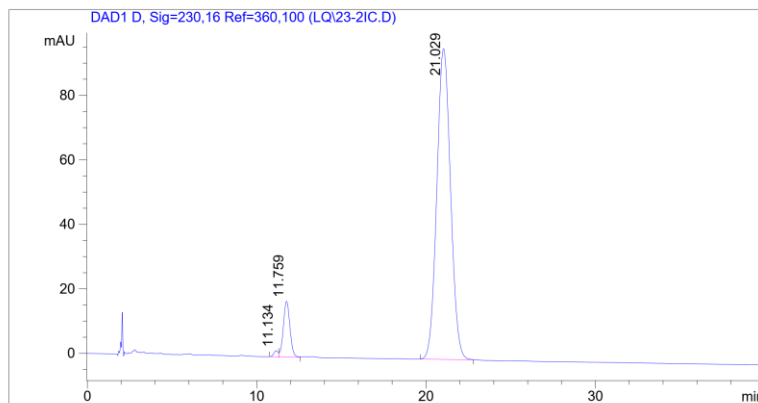

| #     | Ret. Time (min) | Width | Height (mAU) | Area (mAU*s) | Area % |
|-------|-----------------|-------|--------------|--------------|--------|
| 1     | 11.13           | 0.27  | 1.93         | 33.34        | 0.56   |
| 2     | 11.76           | 0.42  | 17.29        | 468.07       | 7.89   |
| 3     | 21.03           | 0.87  | 96.39        | 5434.17      | 91.55  |
| Total |                 |       |              | 5935.59      | 100.00 |

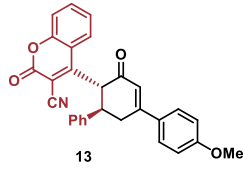

Sample Info: Mobile phase: n-Hexane/EtOH 7:3;  
The sample is solved in MP

Methode file: IC.M  
Column-info: Chiralpak IC (150x4,6)mm  
Operator: Analytical Lab 4.03 - 4.04

Injektion Time: 13:46:53  
Injektion Date: 30.07.2019

Instrument Conditions: At Start At Stop  
Temperature in°C: 30.0 30.0  
Pressure in bar: 32.2 32.8  
Flow in ml/min: 1.00 1.00

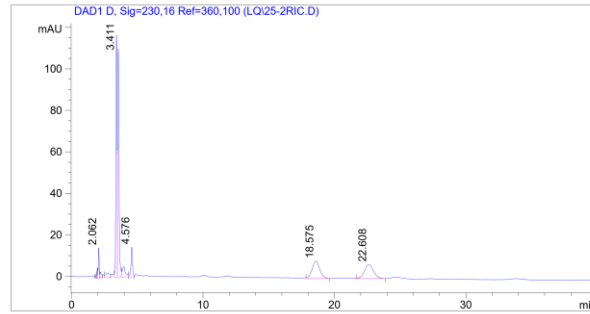

| #     | Ret. Time (min) | Width | Height (mAU) | Area (mAU*s) | Area % |
|-------|-----------------|-------|--------------|--------------|--------|
| 1     | 1.85            | 0.06  | 1.52         | 5.69         | 0.22   |
| 2     | 1.96            | 0.07  | 4.73         | 21.38        | 0.84   |
| 3     | 2.06            | 0.07  | 14.36        | 63.44        | 2.51   |
| 4     | 2.19            | 0.11  | 2.77         | 21.97        | 0.87   |
| 5     | 2.72            | 0.28  | 2.25         | 48.78        | 1.93   |
| 6     | 3.41            | 0.10  | 116.63       | 731.93       | 28.91  |
| 7     | 3.55            | 0.11  | 110.06       | 802.31       | 31.69  |
| 8     | 3.96            | 0.24  | 4.97         | 84.53        | 3.34   |
| 9     | 4.58            | 0.12  | 14.32        | 112.80       | 4.45   |
| 10    | 18.57           | 0.58  | 8.12         | 319.52       | 12.62  |
| 11    | 22.61           | 0.66  | 6.66         | 319.78       | 12.63  |
| Total |                 |       |              | 2532.13      | 100.00 |

Methode file: IC.M  
Column-info: Chiralpak IC (150x4,6)mm  
Operator: Analytical Lab 4.03 - 4.04

Injektion Time: 10:33:55  
Injektion Date: 31.07.2019

Instrument Conditions: At Start At Stop  
Temperature in°C: 30.0 30.0  
Pressure in bar: 32.6 33.4  
Flow in ml/min: 1.00 1.00

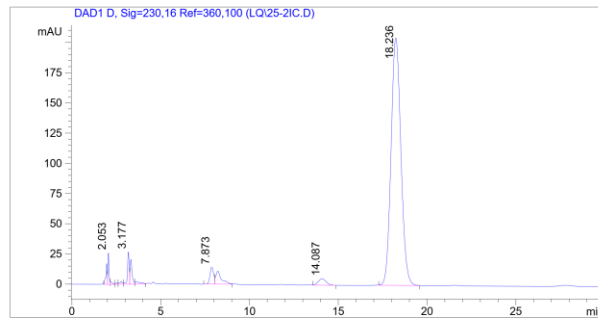

| #     | Ret. Time (min) | Width | Height (mAU) | Area (mAU*s) | Area % |
|-------|-----------------|-------|--------------|--------------|--------|
| 1     | 1.96            | 0.07  | 17.23        | 89.86        | 0.99   |
| 2     | 2.05            | 0.06  | 25.95        | 112.21       | 1.23   |
| 3     | 2.20            | 0.12  | 1.86         | 17.62        | 0.19   |
| 4     | 2.53            | 0.10  | 1.23         | 8.95         | 0.10   |
| 5     | 2.77            | 0.13  | 2.43         | 24.49        | 0.27   |
| 6     | 3.18            | 0.10  | 26.69        | 170.70       | 1.88   |
| 7     | 3.32            | 0.11  | 20.47        | 155.60       | 1.71   |
| 8     | 3.66            | 0.31  | 2.10         | 47.92        | 0.53   |
| 9     | 7.87            | 0.22  | 14.05        | 199.48       | 2.19   |
| 10    | 8.21            | 0.30  | 10.84        | 233.17       | 2.57   |
| 11    | 14.09           | 0.45  | 5.44         | 164.59       | 1.81   |
| 12    | 18.24           | 0.60  | 204.84       | 7863.98      | 86.53  |
| Total |                 |       |              | 9088.57      | 100.00 |



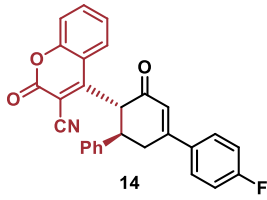

Sample Info: Mobile phase: n-Hexane/EtOH 7:3;  
The sample is solved in MF

Methode file: IC.M  
Column-info: Chiralpak IC (150x4,6)mm  
Operator: Analytical Lab 4.03 - 4.04

Injektion Time: 14:28:08  
Injektion Date: 30.07.2019

Instrument Conditions: At Start At Stop  
Temperature in°C: 30.0 30.0  
Pressure in bar: 31.9 32.6  
Flow in ml/min: 1.00 1.00

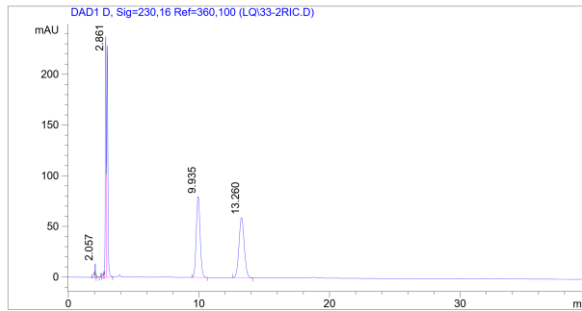

| #     | Ret. Time (min) | Width | Height (mAU) | Area (mAU*s) | Area % |
|-------|-----------------|-------|--------------|--------------|--------|
| 1     | 1.97            | 0.08  | 4.78         | 25.35        | 0.43   |
| 2     | 2.06            | 0.06  | 13.65        | 49.99        | 0.84   |
| 3     | 2.19            | 0.10  | 1.47         | 11.26        | 0.19   |
| 4     | 2.53            | 0.08  | 1.11         | 5.77         | 0.10   |
| 5     | 2.64            | 0.08  | 3.58         | 20.51        | 0.35   |
| 6     | 2.72            | 0.04  | 2.51         | 6.41         | 0.11   |
| 7     | 2.86            | 0.08  | 238.30       | 1193.10      | 20.11  |
| 8     | 2.98            | 0.09  | 229.20       | 1332.86      | 22.47  |
| 9     | 9.93            | 0.32  | 79.87        | 1626.32      | 27.42  |
| 10    | 13.26           | 0.43  | 59.32        | 1660.57      | 27.99  |
| Total |                 |       |              | 5932.14      | 100.00 |

Methode file: IC.M  
Column-info: Chiralpak IC (150x4,6)mm  
Operator: Analytical Lab 4.03 - 4.04

Injektion Time: 11:05:11  
Injektion Date: 31.07.2019

Instrument Conditions: At Start At Stop  
Temperature in°C: 30.0 30.0  
Pressure in bar: 32.5 33.5  
Flow in ml/min: 1.00 1.00

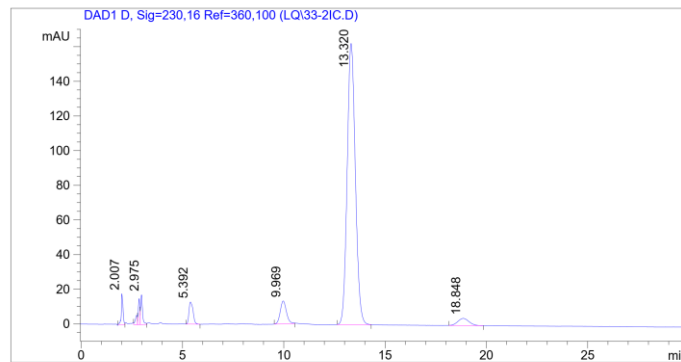

| #     | Ret. Time (min) | Width | Height (mAU) | Area (mAU*s) | Area % |
|-------|-----------------|-------|--------------|--------------|--------|
| 1     | 2.01            | 0.08  | 17.94        | 106.75       | 1.94   |
| 2     | 2.74            | 0.10  | 5.40         | 38.23        | 0.70   |
| 3     | 2.86            | 0.08  | 15.04        | 79.41        | 1.44   |
| 4     | 2.97            | 0.09  | 17.21        | 110.00       | 2.00   |
| 5     | 5.39            | 0.23  | 12.83        | 178.98       | 3.26   |
| 6     | 9.97            | 0.33  | 13.21        | 279.43       | 5.08   |
| 7     | 13.32           | 0.43  | 162.29       | 4546.96      | 82.71  |
| 8     | 18.85           | 0.52  | 4.12         | 157.61       | 2.87   |
| Total |                 |       |              | 5497.37      | 100.00 |

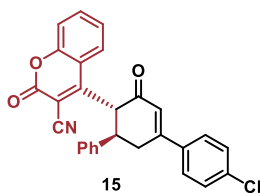

Sample Info: Mobile phase: n-Hexane/EtOH 7:3;  
The sample is solved in MP

Methode file: IC.M  
Column-info: Chiralpak IC (150x4,6)mm  
Operator: Analytical Lab 4.03 - 4.04

Injektion Time: 17:44:43  
Injektion Date: 26.07.2019

Instrument Conditions: At Start At Stop  
Temperature in °C: 30.0 30.0  
Pressure in bar: 31.9 32.3  
Flow in ml/min: 1.00 1.00

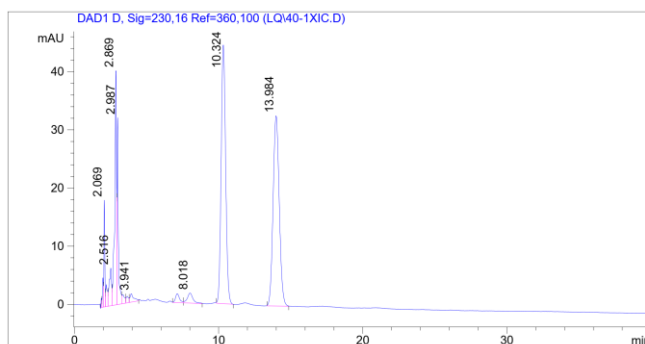

| #     | Ret. Time (min) | Width | Height (mAU) | Area (mAU*s) | Area % |
|-------|-----------------|-------|--------------|--------------|--------|
| 1     | 1.86            | 0.05  | 1.61         | 5.58         | 0.20   |
| 2     | 1.97            | 0.06  | 5.05         | 21.99        | 0.78   |
| 3     | 2.07            | 0.06  | 18.38        | 78.84        | 2.81   |
| 4     | 2.20            | 0.10  | 3.80         | 29.96        | 1.07   |
| 5     | 2.52            | 0.15  | 6.49         | 74.54        | 2.66   |
| 6     | 2.87            | 0.11  | 40.28        | 318.35       | 11.35  |
| 7     | 2.99            | 0.10  | 32.15        | 214.45       | 7.64   |
| 8     | 3.37            | 0.16  | 1.53         | 18.47        | 0.66   |
| 9     | 3.66            | 0.16  | 1.12         | 13.15        | 0.47   |
| 10    | 3.94            | 0.25  | 1.46         | 27.12        | 0.97   |
| 11    | 7.13            | 0.28  | 1.55         | 30.12        | 1.07   |
| 12    | 8.02            | 0.38  | 1.73         | 46.93        | 1.67   |
| 13    | 10.32           | 0.34  | 44.50        | 959.96       | 34.22  |
| 14    | 13.98           | 0.46  | 32.71        | 965.84       | 34.43  |
| Total |                 |       |              | 2805.30      | 100.00 |

Methode file: IC.M  
Column-info: Chiralpak IC (150x4,6)mm  
Operator: Analytical Lab 4.03 - 4.04

Injektion Time: 11:54:56  
Injektion Date: 08.08.2019

Instrument Conditions: At Start At Stop  
Temperature in °C: 30.0 30.0  
Pressure in bar: 32.5 32.8  
Flow in ml/min: 1.00 1.00

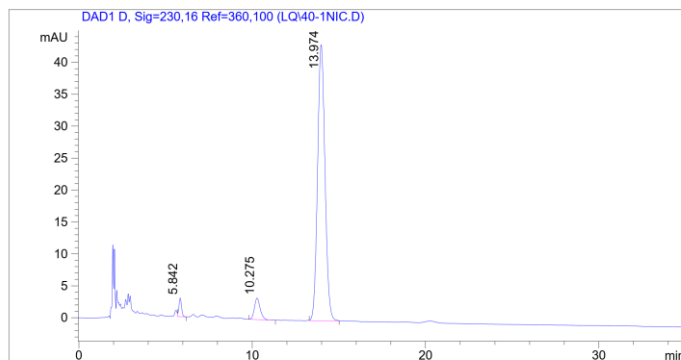

| #     | Ret. Time (min) | Width | Height (mAU) | Area (mAU*s) | Area % |
|-------|-----------------|-------|--------------|--------------|--------|
| 1     | 5.84            | 0.16  | 2.93         | 30.86        | 2.21   |
| 2     | 10.27           | 0.35  | 3.37         | 78.75        | 5.65   |
| 3     | 13.97           | 0.46  | 43.22        | 1284.57      | 92.14  |
| Total |                 |       |              | 1394.17      | 100.00 |

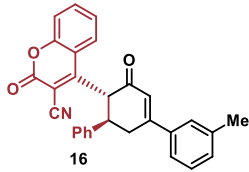

Sample Info: Mobile phase: n-Hexane/EtOH 7:3;  
The sample is solved in MP

Methode file: IC.M  
Column-info: Chiralpak IC (150x4,6)mm  
Operator: Analytical Lab 4.03 - 4.04

Injektion Time: 11:33:25  
Injektion Date: 26.07.2019

Instrument Conditions: At Start At Stop  
Temperature in °C: 30.0 30.0  
Pressure in bar: 32.0 32.6  
Flow in ml/min: 1.00 1.00

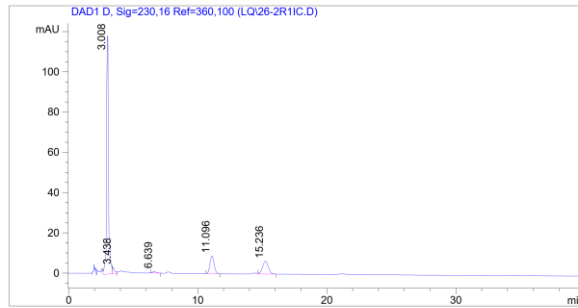

| #     | Ret. Time (min) | Width | Height (mAU) | Area (mAU*s) | Area % |
|-------|-----------------|-------|--------------|--------------|--------|
| 1     | 3.01            | 0.16  | 118.61       | 1251.09      | 73.49  |
| 2     | 3.44            | 0.15  | 3.14         | 35.70        | 2.10   |
| 3     | 6.64            | 0.26  | 0.81         | 15.13        | 0.89   |
| 4     | 11.10           | 0.34  | 8.86         | 199.88       | 11.74  |
| 5     | 15.24           | 0.46  | 6.38         | 200.66       | 11.79  |
| Total |                 |       |              | 1702.46      | 100.00 |

Methode file: IC.M  
Column-info: Chiralpak IC (150x4,6)mm  
Operator: Analytical Lab 4.03 - 4.04

Injektion Time: 15:40:53  
Injektion Date: 26.07.2019

Instrument Conditions: At Start At Stop  
Temperature in °C: 30.0 30.0  
Pressure in bar: 31.5 32.0  
Flow in ml/min: 1.00 1.00

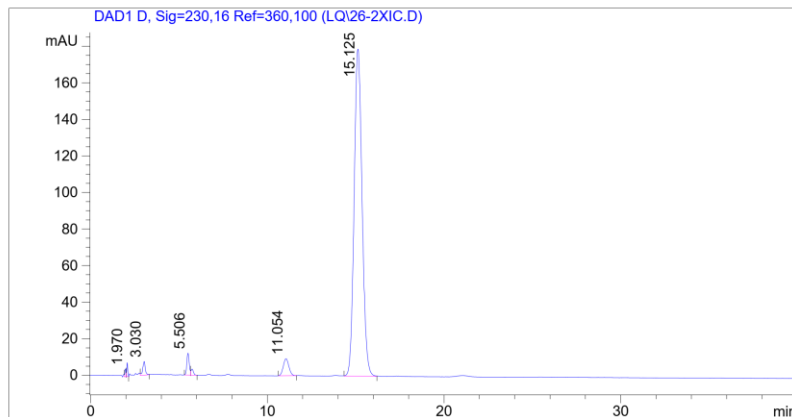

| #     | Ret. Time (min) | Width | Height (mAU) | Area (mAU*s) | Area % |
|-------|-----------------|-------|--------------|--------------|--------|
| 1     | 1.97            | 0.07  | 4.31         | 19.86        | 0.33   |
| 2     | 2.07            | 0.06  | 7.63         | 29.43        | 0.49   |
| 3     | 3.03            | 0.14  | 7.56         | 75.58        | 1.25   |
| 4     | 5.51            | 0.15  | 11.97        | 113.57       | 1.88   |
| 5     | 5.74            | 0.14  | 3.26         | 30.84        | 0.51   |
| 6     | 11.05           | 0.33  | 9.32         | 205.07       | 3.39   |
| 7     | 15.13           | 0.49  | 178.96       | 5582.57      | 92.17  |
| Total |                 |       |              | 6056.92      | 100.00 |

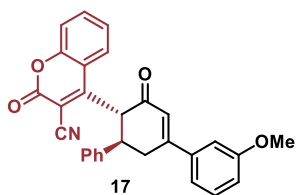

Sample Info: Mobile phase: n-Hexane/EtOH 7:3;  
The sample is solved in MP

Methode file: IC.M  
Column-info: Chiralpak IC (150x4,6)mm  
Operator: Analytical Lab 4.03 - 4.04

Injektion Time: 13:34:21  
Injektion Date: 06.08.2019

Instrument Conditions: At Start At Stop  
Temperature in°C: 30.0 30.0  
Pressure in bar: 32.6 33.1  
Flow in ml/min: 1.00 1.00

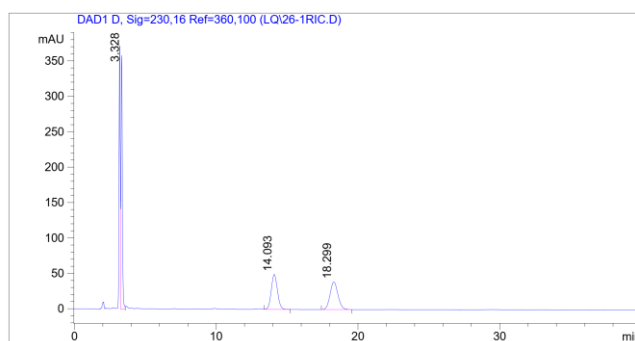

| #     | Ret. Time (min) | Width | Height (mAU) | Area (mAU*s) | Area % |
|-------|-----------------|-------|--------------|--------------|--------|
| 1     | 3.33            | 0.10  | 358.30       | 2330.11      | 43.67  |
| 2     | 14.09           | 0.47  | 49.47        | 1493.68      | 28.00  |
| 3     | 18.30           | 0.60  | 39.00        | 1511.73      | 28.33  |
| Total |                 |       |              | 5335.52      | 100.00 |

Methode file: IC.M  
Column-info: Chiralpak IC (150x4,6)mm  
Operator: Analytical Lab 4.03 - 4.04

Injektion Time: 14:15:35  
Injektion Date: 06.08.2019

Instrument Conditions: At Start At Stop  
Temperature in°C: 30.0 30.0  
Pressure in bar: 32.4 32.9  
Flow in ml/min: 1.00 1.00

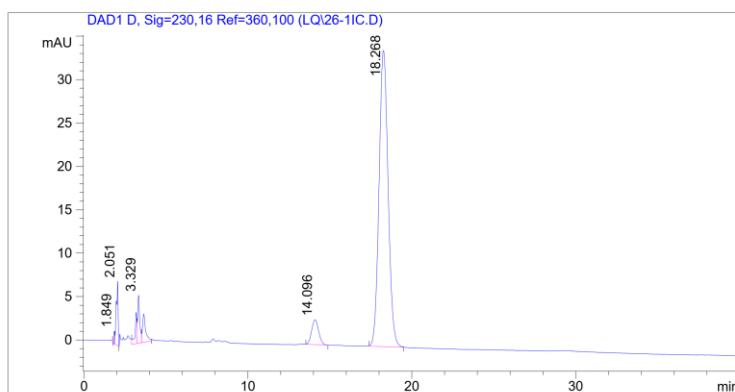

| #     | Ret. Time (min) | Width | Height (mAU) | Area (mAU*s) | Area % |
|-------|-----------------|-------|--------------|--------------|--------|
| 1     | 1.85            | 0.06  | 1.43         | 5.16         | 0.33   |
| 2     | 2.05            | 0.10  | 7.40         | 56.54        | 3.58   |
| 3     | 3.18            | 0.11  | 3.60         | 27.99        | 1.77   |
| 4     | 3.33            | 0.13  | 5.53         | 48.46        | 3.07   |
| 5     | 3.64            | 0.19  | 3.28         | 44.64        | 2.83   |
| 6     | 14.10           | 0.44  | 2.86         | 85.09        | 5.39   |
| 7     | 18.27           | 0.60  | 34.13        | 1309.46      | 83.02  |
| Total |                 |       |              | 1577.33      | 100.00 |

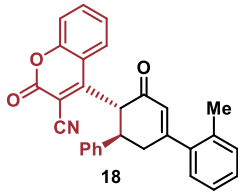

Sample Info: Mobile phase: n-Hexane/EtOH 7:3;  
The sample is solved in MP

Methode file: IC.M  
Column-info: Chiralpak IC (150x4,6)mm  
Operator: Analytical Lab 4.03 - 4.04

Injektion Time: 14:56:54  
Injektion Date: 06.08.2019

Instrument Conditions: At Start At Stop  
Temperature in°C: 30.0 30.0  
Pressure in bar: 32.2 32.6  
Flow in ml/min: 1.00 1.00

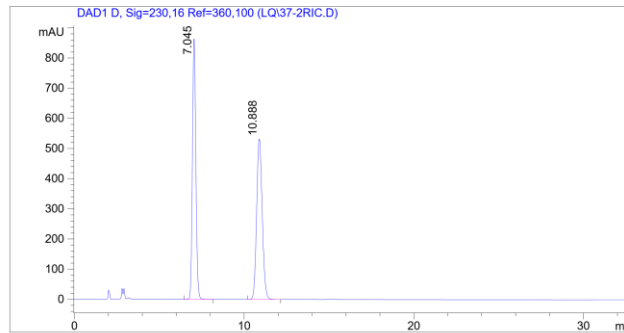

| #     | Ret. Time (min) | Width | Height (mAU) | Area (mAU*s) | Area % |
|-------|-----------------|-------|--------------|--------------|--------|
| 1     | 7.04            | 0.22  | 864.07       | 12077.90     | 49.82  |
| 2     | 10.89           | 0.35  | 532.74       | 12164.72     | 50.18  |
| Total |                 |       |              | 24242.62     | 100.00 |

Methode file: IC.M  
Column-info: Chiralpak IC (150x4,6)mm  
Operator: Analytical Lab 4.03 - 4.04

Injektion Time: 15:31:09  
Injektion Date: 06.08.2019

Instrument Conditions: At Start At Stop  
Temperature in°C: 30.0 30.0  
Pressure in bar: 32.7 32.7  
Flow in ml/min: 1.00 1.00

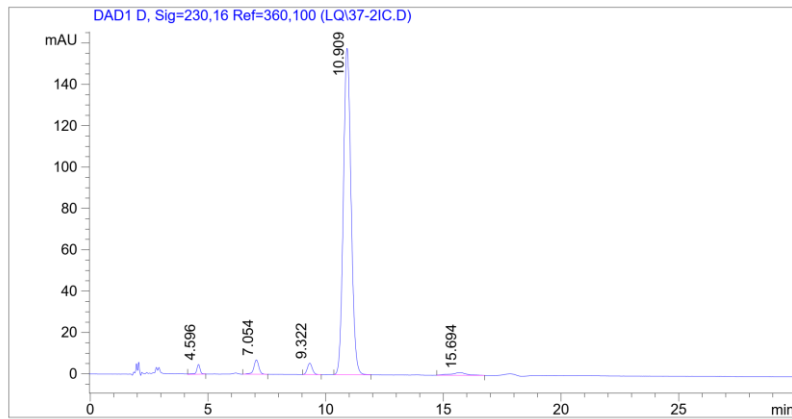

| #     | Ret. Time (min) | Width | Height (mAU) | Area (mAU*s) | Area % |
|-------|-----------------|-------|--------------|--------------|--------|
| 1     | 4.60            | 0.16  | 4.77         | 50.42        | 1.29   |
| 2     | 7.05            | 0.23  | 6.98         | 103.92       | 2.67   |
| 3     | 9.32            | 0.23  | 5.52         | 81.08        | 2.08   |
| 4     | 10.91           | 0.35  | 157.92       | 3597.87      | 92.38  |
| 5     | 15.69           | 0.59  | 1.32         | 61.48        | 1.58   |
| Total |                 |       |              | 3894.77      | 100.00 |

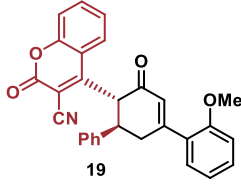

Sample Info: Mobile phase:n-Hexane/EtOH 7:3;  
The sample is solved in MP

Methode file: IC.M  
Column-info: Chiralpak IC (150x4,6)mm  
Operator: Analytical Lab 4.03 - 4.04

Injektion Time: 10:59:54  
Injektion Date: 16.08.2019

Instrument Conditions: At Start At Stop  
Temperature in°C: 30.0 30.0  
Pressure in bar: 32.7 33.1  
Flow in ml/min: 1.00 1.00

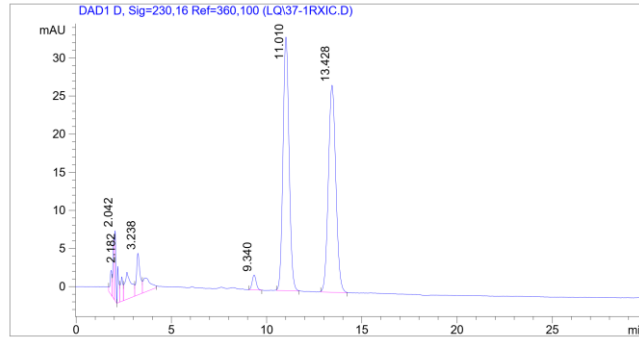

| #     | Ret. Time (min) | Width | Height (mAU) | Area (mAU*s) | Area % |
|-------|-----------------|-------|--------------|--------------|--------|
| 1     | 1.84            | 0.10  | 3.23         | 22.17        | 1.18   |
| 2     | 1.98            | 0.08  | 8.09         | 42.61        | 2.27   |
| 3     | 2.04            | 0.06  | 9.23         | 41.36        | 2.21   |
| 4     | 2.18            | 0.08  | 4.82         | 26.70        | 1.42   |
| 5     | 2.39            | 0.11  | 3.22         | 27.28        | 1.46   |
| 6     | 2.66            | 0.29  | 3.56         | 81.69        | 4.36   |
| 7     | 3.24            | 0.19  | 5.47         | 72.74        | 3.88   |
| 8     | 3.61            | 0.33  | 1.88         | 48.68        | 2.60   |
| 9     | 9.34            | 0.23  | 1.96         | 28.71        | 1.53   |
| 10    | 11.01           | 0.34  | 33.29        | 738.97       | 39.44  |
| 11    | 13.43           | 0.42  | 27.18        | 742.77       | 39.64  |
| Total |                 |       |              | 1873.69      | 100.00 |

Methode file: IC.M  
Column-info: Chiralpak IC (150x4,6)mm  
Operator: Analytical Lab 4.03 - 4.04

Injektion Time: 11:18:40  
Injektion Date: 08.08.2019

Instrument Conditions: At Start At Stop  
Temperature in°C: 30.0 30.0  
Pressure in bar: 32.9 33.3  
Flow in ml/min: 1.00 1.00

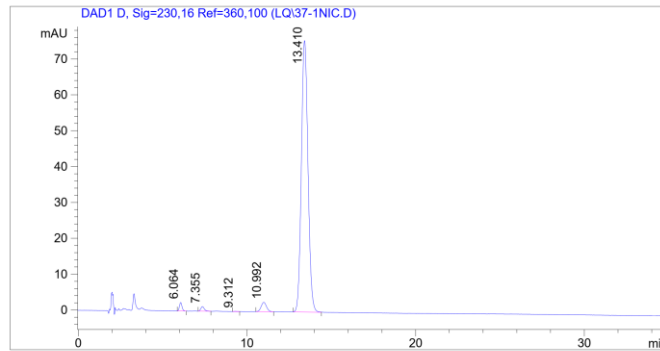

| #     | Ret. Time (min) | Width | Height (mAU) | Area (mAU*s) | Area % |
|-------|-----------------|-------|--------------|--------------|--------|
| 1     | 6.06            | 0.16  | 2.39         | 25.33        | 1.17   |
| 2     | 7.36            | 0.21  | 1.29         | 18.24        | 0.84   |
| 3     | 9.31            | 0.15  | 0.07         | 0.85         | 0.04   |
| 4     | 10.99           | 0.35  | 2.61         | 58.26        | 2.69   |
| 5     | 13.41           | 0.42  | 75.73        | 2059.53      | 95.25  |
| Total |                 |       |              | 2162.21      | 100.00 |

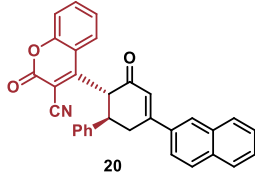

Sample Info: Mobile phase: n-Hexane/EtOH 7:3;  
The sample is solved in MP

Methode file: IC.M  
Column-info: Chiralpak IC (150x4,6)mm  
Operator: Analytical Lab 4.03 - 4.04

Injektion Time: 12:14:38  
Injektion Date: 26.07.2019

Instrument Conditions: At Start At Stop  
Temperature in°C: 30.0 30.0  
Pressure in bar: 32.2 32.4  
Flow in ml/min: 1.00 1.00

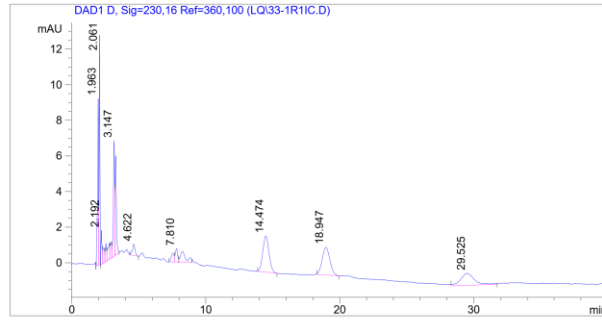

| #     | Ret. Time (min) | Width | Height (mAU) | Area (mAU*s) | Area % |        |
|-------|-----------------|-------|--------------|--------------|--------|--------|
| 1     | 1.96            | 0.07  | 9.37         | 48.82        | 11.12  |        |
| 2     | 2.06            | 0.06  | 13.00        | 49.49        | 11.27  |        |
| 3     | 2.19            | 0.07  | 1.94         | 10.27        | 2.34   |        |
| 4     | 2.38            | 0.13  | 0.84         | 7.47         | 1.70   |        |
| 5     | 2.54            | 0.09  | 1.02         | 6.64         | 1.51   |        |
| 6     | 2.79            | 0.14  | 0.87         | 9.37         | 2.13   |        |
| 7     | 2.90            | 0.12  | 0.92         | 7.51         | 1.71   |        |
| 8     | 3.15            | 0.10  | 6.49         | 42.22        | 9.61   |        |
| 9     | 3.26            | 0.10  | 5.58         | 37.68        | 8.58   |        |
| 10    | 4.62            | 0.20  | 0.65         | 9.12         | 2.08   |        |
| 11    | 7.51            | 0.19  | 0.49         | 7.15         | 1.63   |        |
| 12    | 7.81            | 0.18  | 0.75         | 9.14         | 2.08   |        |
| 13    | 8.26            | 0.35  | 0.60         | 16.94        | 3.86   |        |
| 14    | 14.47           | 0.42  | 2.04         | 65.67        | 14.95  |        |
| 15    | 18.95           | 0.48  | 1.56         | 62.54        | 14.24  |        |
| 16    | 29.52           | 1.20  | 0.68         | 49.16        | 11.19  |        |
| Total |                 |       |              |              | 439.20 | 100.00 |

Methode file: IC.M  
Column-info: Chiralpak IC (150x4,6)mm  
Operator: Analytical Lab 4.03 - 4.04

Injektion Time: 16:22:09  
Injektion Date: 26.07.2019

Instrument Conditions: At Start At Stop  
Temperature in°C: 30.0 30.0  
Pressure in bar: 31.4 32.3  
Flow in ml/min: 1.00 1.00

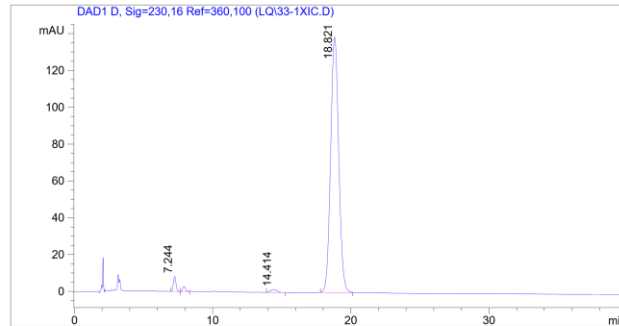

| #     | Ret. Time (min) | Width | Height (mAU) | Area (mAU*s) | Area %  |        |
|-------|-----------------|-------|--------------|--------------|---------|--------|
| 1     | 7.24            | 0.20  | 8.17         | 107.26       | 1.84    |        |
| 2     | 7.92            | 0.23  | 2.73         | 42.16        | 0.72    |        |
| 3     | 14.41           | 0.44  | 1.55         | 49.63        | 0.85    |        |
| 4     | 18.82           | 0.63  | 138.73       | 5631.89      | 96.59   |        |
| Total |                 |       |              |              | 5830.94 | 100.00 |

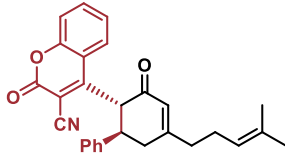

21

Sample Info: Mobile phase: n-Hexane/EtOH 7:3;  
The sample is solved in MP

Methode file: IC.M  
Column-info: Chiralpak IC (150x4,6)mm  
Operator: Analytical Lab 4.03 - 4.04

Injektion Time: 16:08:49  
Injektion Date: 08.08.2019

Instrument Conditions: At Start At Stop  
Temperature in °C: 30.0 30.0  
Pressure in bar: 32.6 33.0  
Flow in ml/min: 1.00 1.00

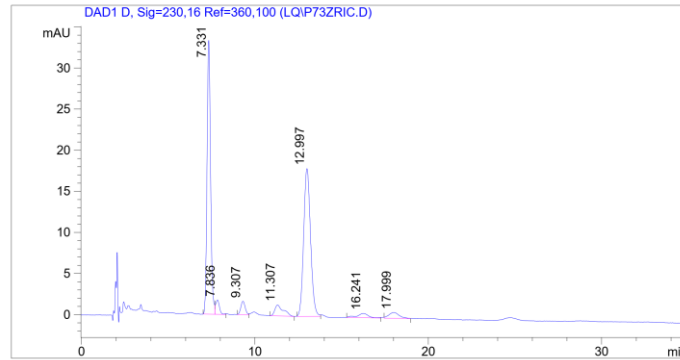

| #     | Ret. Time (min) | Width | Height (mAU) | Area (mAU*s) | Area % |
|-------|-----------------|-------|--------------|--------------|--------|
| 1     | 7.33            | 0.22  | 33.31        | 473.99       | 42.05  |
| 2     | 7.84            | 0.23  | 1.75         | 26.73        | 2.37   |
| 3     | 9.31            | 0.27  | 1.64         | 28.89        | 2.56   |
| 4     | 11.31           | 0.48  | 1.33         | 46.01        | 4.08   |
| 5     | 13.00           | 0.43  | 17.98        | 496.82       | 44.08  |
| 6     | 16.24           | 0.57  | 0.54         | 24.86        | 2.21   |
| 7     | 18.00           | 0.50  | 0.70         | 29.84        | 2.65   |
| Total |                 |       |              | 1127.13      | 100.00 |

Methode file: IC.M  
Column-info: Chiralpak IC (150x4,6)mm  
Operator: Analytical Lab 4.03 - 4.04

Injektion Time: 16:45:04  
Injektion Date: 08.08.2019

Instrument Conditions: At Start At Stop  
Temperature in °C: 30.0 30.0  
Pressure in bar: 32.4 33.2  
Flow in ml/min: 1.00 1.00

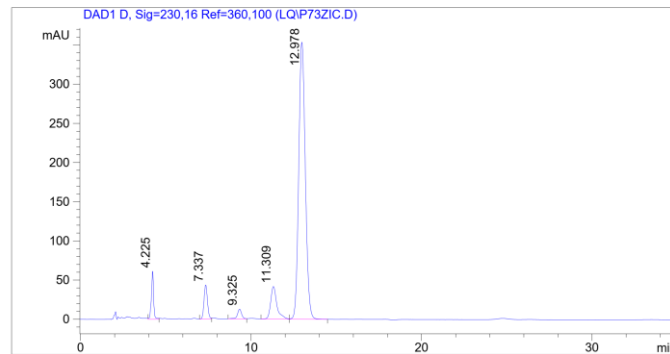

| #     | Ret. Time (min) | Width | Height (mAU) | Area (mAU*s) | Area % |
|-------|-----------------|-------|--------------|--------------|--------|
| 1     | 4.23            | 0.13  | 61.19        | 552.39       | 4.64   |
| 2     | 7.34            | 0.22  | 43.35        | 605.93       | 5.09   |
| 3     | 9.32            | 0.26  | 12.44        | 214.10       | 1.80   |
| 4     | 11.31           | 0.38  | 41.55        | 1049.98      | 8.82   |
| 5     | 12.98           | 0.41  | 353.57       | 9481.86      | 79.65  |
| Total |                 |       |              | 11904.27     | 100.00 |



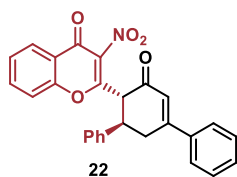

Sample Info: Mobile phase: n-Heptane/EtOH 7:3; Flow 0.7, Chiralpak AS  
 Säule: DAICELAS.M  
 Säuleninfo: Chiralpak AS (250x4,6)mm  
 Operator: Analytik Labor AKEN

Injektion Time: 11:19:14  
 Injektion Date: 10.05.2017

Instrument Conditions: At Start At Stop  
 Temperature in °C: 30.0 °C 30.0 °C  
 Pressure in bar: 38.1 39.3  
 Flow in ml/min: 0.70 0.70

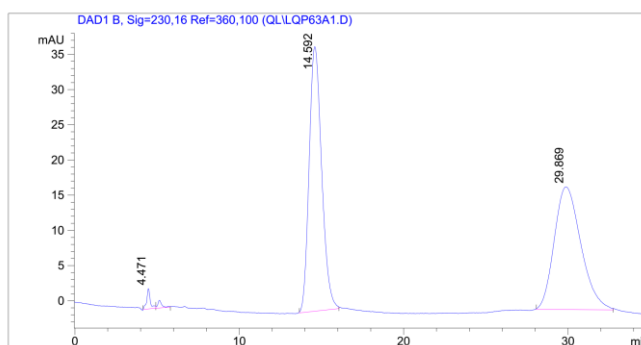

| #     | Ret. Time (min) | Width | Height (mAU) | Area (mAU*s) | Area % |
|-------|-----------------|-------|--------------|--------------|--------|
| 1     | 4.47            | 0.22  | 2.89         | 44.10        | 1.10   |
| 2     | 5.14            | 0.24  | 1.10         | 18.76        | 0.47   |
| 3     | 14.59           | 0.80  | 37.59        | 1989.14      | 49.47  |
| 4     | 29.87           | 1.35  | 17.46        | 1968.67      | 48.96  |
| Total |                 |       |              | 4020.66      | 100.00 |

Säule: DAICELAS.M  
 Säuleninfo: Chiralpak AS (250x4,6)mm  
 Operator: Analytik Labor AKEN

Injektion Time: 10:38:47  
 Injektion Date: 02.06.2017

Instrument Conditions: At Start At Stop  
 Temperature in °C: 30.0 °C 30.0 °C  
 Pressure in bar: 25.0 25.5  
 Flow in ml/min: 0.70 0.70

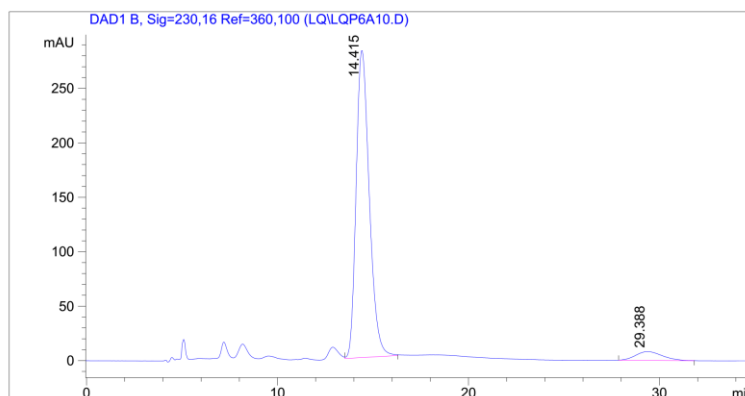

| #     | Ret. Time (min) | Width | Height (mAU) | Area (mAU*s) | Area % |
|-------|-----------------|-------|--------------|--------------|--------|
| 1     | 14.42           | 0.74  | 282.20       | 13496.71     | 94.46  |
| 2     | 29.39           | 1.15  | 8.10         | 791.43       | 5.54   |
| Total |                 |       |              | 14288.14     | 100.00 |

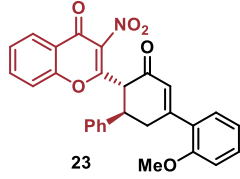

Sample Info: Mobile phase: n-Heptane/EtOH 8:2,  
The sample is solved in DCM/MP

Column: DAICELIB.M  
Column info: Chiralpak IB (250x4,6)mm  
Operator: Analytik Labor AK Schoenebeck

Injektion Time: 17:55:01  
Injektion Date: 06.09.2017

Instrument Conditions: At Start At Stop  
Temperature in °C: 30.0°C 30.0°C  
Pressure in bar: 38.7 38.7  
Flow in ml/min: 0.70 0.70

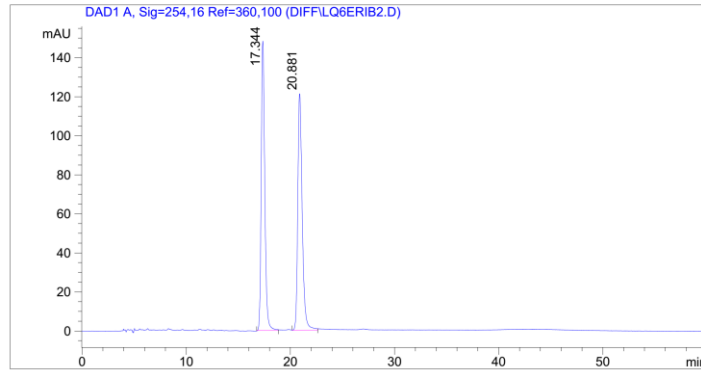

| #     | Ret. Time (min) | Width | Height (mAU) | Area (mAU*s) | Area % |
|-------|-----------------|-------|--------------|--------------|--------|
| 1     | 17.34           | 0.36  | 148.23       | 3521.97      | 49.51  |
| 2     | 20.88           | 0.49  | 121.14       | 3591.04      | 50.49  |
| Total |                 |       |              | 7113.01      | 100.00 |

Column: IB.M  
Column-info: Chiralpak IB (250x4,6)mm  
Operator: Analytical Lab 4.04

Injektion Time: 11:31:06  
Injektion Date: 13.10.2017

Instrument Conditions: At Start At Stop  
Temperature in °C: 30.0 30.0  
Pressure in bar: 36.3 36.9  
Flow in ml/min: 0.7 0.7

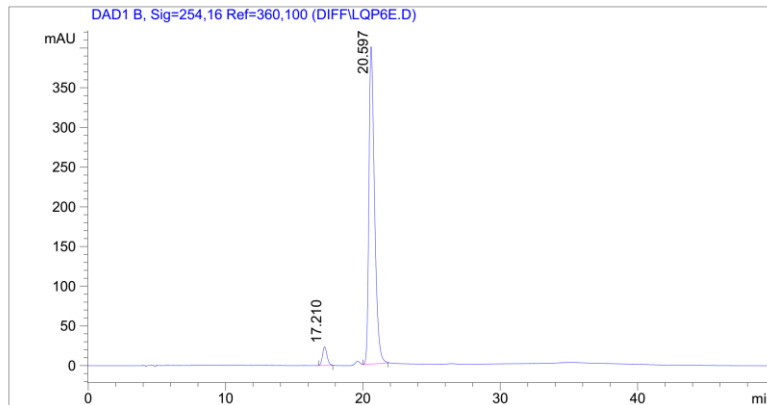

| #     | Ret. Time (min) | Width | Height (mAU) | Area (mAU*s) | Area % |
|-------|-----------------|-------|--------------|--------------|--------|
| 1     | 17.21           | 0.35  | 23.34        | 537.75       | 4.52   |
| 2     | 20.60           | 0.43  | 400.08       | 11348.67     | 95.48  |
| Total |                 |       |              | 11886.42     | 100.00 |

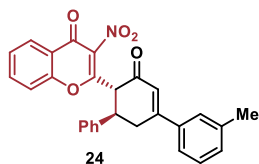

Sample Info: Mobile phase: n-Heptane/EtOH 7:3; Flow 0.7, Chiralpak AS  
 Säule: DAICELAS.M  
 Säuleninfo: Chiralpak AS (250x4,6)mm  
 Operator: Analytik Labor AKEN

Injektion Time: 15:54:39  
 Injektion Date: 15.05.2017

Instrument Conditions: At Start At Stop  
 Temperature in °C: 30.0 °C 30.0 °C  
 Pressure in bar: 39.1 40.1  
 Flow in ml/min: 0.70 0.70

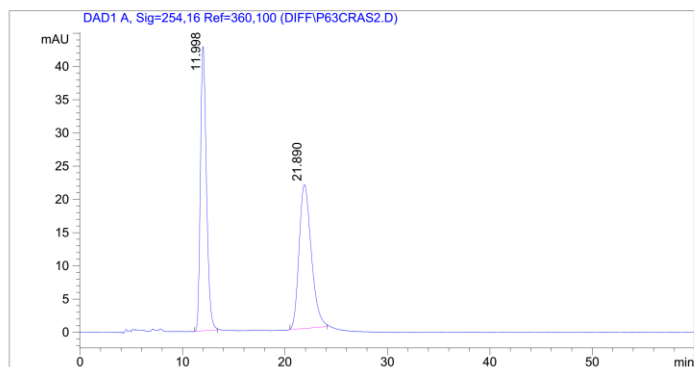

| #     | Ret. Time (min) | Width | Height (mAU) | Area (mAU*s) | Area % |
|-------|-----------------|-------|--------------|--------------|--------|
| 1     | 12.00           | 0.63  | 42.80        | 1746.29      | 49.37  |
| 2     | 21.89           | 1.12  | 21.64        | 1791.15      | 50.63  |
| Total |                 |       |              | 3537.44      | 100.00 |

Säule: DAICELAS.M  
 Säuleninfo: Chiralpak AS (250x4,6)mm  
 Operator: Analytik Labor AK Schoenebeck

Injektion Time: 11:25:21  
 Injektion Date: 21.08.2017

Instrument Conditions: At Start At Stop  
 Temperature in °C: 30.0 °C 30.0 °C  
 Pressure in bar: 26.3 26.7  
 Flow in ml/min: 0.70 0.70

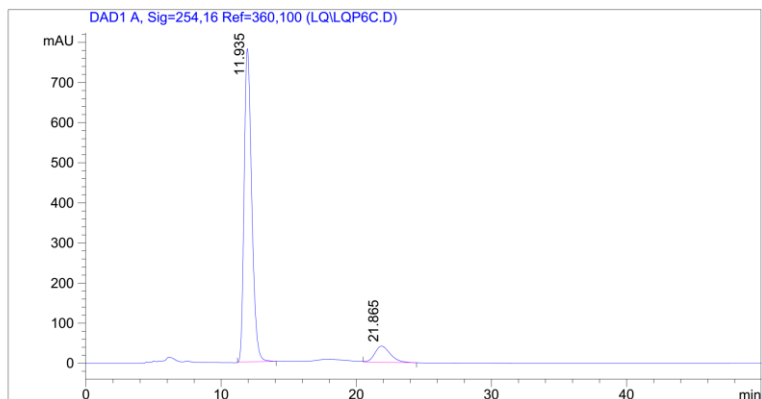

| #     | Ret. Time (min) | Width | Height (mAU) | Area (mAU*s) | Area % |
|-------|-----------------|-------|--------------|--------------|--------|
| 1     | 11.93           | 0.60  | 780.82       | 30430.44     | 90.38  |
| 2     | 21.87           | 1.18  | 40.31        | 3239.91      | 9.62   |
| Total |                 |       |              | 33670.35     | 100.00 |

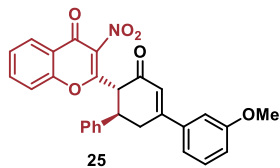

Sample Info: Mobile phase: n-Heptane/EtOH 7:3;  
The sample is solved in DCM/MP

Column: DAICELAS.M  
Column info: Chiralcel OD (250x4,6)mm  
Operator: Analytik Labor AKEN

Injektion Time: 22:32:01  
Injektion Date: 23.06.2017

Instrument Conditions: At Start At Stop  
Temperature in °C: 30.0°C 30.0°C  
Pressure in bar: 26.1 26.6  
Flow in ml/min: 0.70 0.70

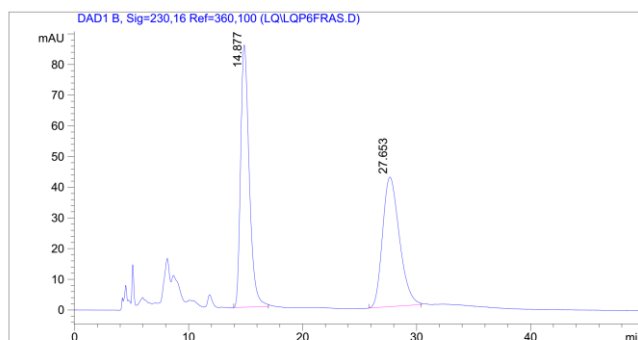

| #     | Ret. Time (min) | Width | Height (mAU) | Area (mAU*s) | Area % |
|-------|-----------------|-------|--------------|--------------|--------|
| 1     | 14.88           | 0.80  | 85.52        | 4492.87      | 50.84  |
| 2     | 27.65           | 1.55  | 42.27        | 4343.75      | 49.16  |
| Total |                 |       |              | 8836.61      | 100.00 |

Säule: DAICELAS.M  
Säuleninfo: Chiralpak AS (250x4,6)mm  
Operator: Analytik Labor AK Schoenebeck

Injektion Time: 15:12:56  
Injektion Date: 23.08.2017

Instrument Conditions: At Start At Stop  
Temperature in °C: 30.0°C 30.0°C  
Pressure in bar: 25.8 26.7  
Flow in ml/min: 0.70 0.70

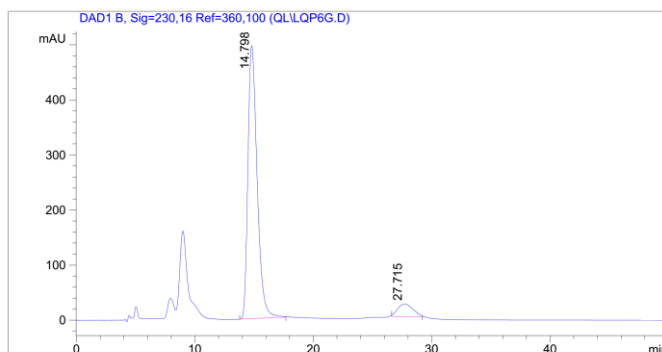

| #     | Ret. Time (min) | Width | Height (mAU) | Area (mAU*s) | Area % |
|-------|-----------------|-------|--------------|--------------|--------|
| 1     | 14.80           | 0.83  | 495.91       | 26764.85     | 92.84  |
| 2     | 27.00           | 0.00  | 10.66        | 0.00         | 0.00   |
| 3     | 27.18           | 0.00  | 15.43        | 0.00         | 0.00   |
| 4     | 27.45           | 0.00  | 21.08        | 0.00         | 0.00   |
| 5     | 27.60           | 0.00  | 22.63        | 0.00         | 0.00   |
| 6     | 27.71           | 1.50  | 23.00        | 2064.77      | 7.16   |
| 7     | 27.98           | 0.00  | 21.01        | 0.00         | 0.00   |
| 8     | 28.11           | 0.00  | 19.11        | 0.00         | 0.00   |
| 9     | 28.37           | 0.00  | 14.30        | 0.00         | 0.00   |
| 10    | 28.72           | 0.00  | 7.84         | 0.00         | 0.00   |
| 11    | 28.91           | 0.00  | 4.74         | 0.00         | 0.00   |
| Total |                 |       |              | 28829.62     | 100.00 |

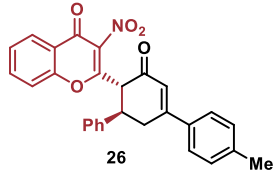

Sample Info: Mobile phase: n-Heptane/EtOH 7:3;  
The sample is solved in DCM/MP

Säule: DAICELAS.M  
Säuleninfo: Chiralpak AS (250x4,6)mm  
Operator: Analytik Labor AKEN

Injektion Time: 11:25:59  
Injektion Date: 23.06.2017

Instrument Conditions: At Start At Stop  
Temperature in °C: 30.0 °C 30.0 °C  
Pressure in bar: 25.6 25.5  
Flow in ml/min: 0.70 0.70

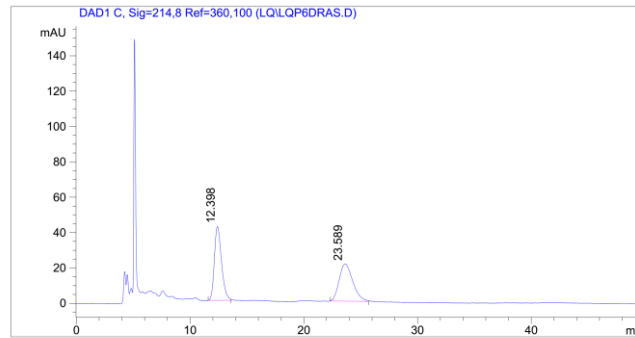

| #     | Ret. Time (min) | Width | Height (mAU) | Area (mAU*s) | Area % |
|-------|-----------------|-------|--------------|--------------|--------|
| 1     | 12.40           | 0.66  | 41.82        | 1823.04      | 51.06  |
| 2     | 23.59           | 0.99  | 21.03        | 1747.19      | 48.94  |
| Total |                 |       |              | 3570.22      | 100.00 |

Säule: DAICELAS.M  
Säuleninfo: Chiralpak AS (250x4,6)mm  
Operator: Analytik Labor AK Schoenebeck

Injektion Time: 12:16:34  
Injektion Date: 21.08.2017

Instrument Conditions: At Start At Stop  
Temperature in °C: 30.0 °C 30.0 °C  
Pressure in bar: 26.3 26.7  
Flow in ml/min: 0.70 0.70

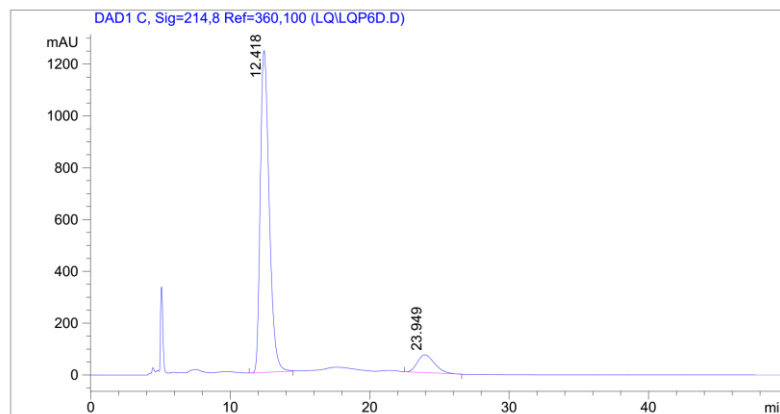

| #     | Ret. Time (min) | Width | Height (mAU) | Area (mAU*s) | Area % |
|-------|-----------------|-------|--------------|--------------|--------|
| 1     | 12.42           | 0.69  | 1242.98      | 55302.56     | 90.43  |
| 2     | 23.95           | 1.10  | 68.70        | 5855.91      | 9.57   |
| Total |                 |       |              | 61158.48     | 100.00 |

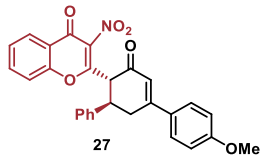

Sample Info: Mobile phase: n-Heptane/EtOH 7:3;  
The sample is solved in DCM/MP

Säule: DAICELAS.M  
Säuleninfo: Chiralpak AS (250x4,6)mm  
Operator: Analytik Labor AK Schoenebeck

Injektion Time: 12:26:41  
Injektion Date: 29.08.2017

Instrument Conditions: At Start At Stop  
Temperature in °C: 30.0°C 30.0°C  
Pressure in bar: 25.9 26.8  
Flow in ml/min: 0.70 0.70

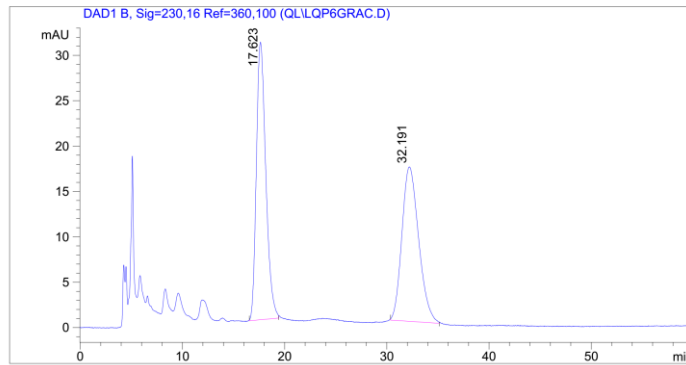

| #     | Ret. Time (min) | Width | Height (mAU) | Area (mAU*s) | Area % |
|-------|-----------------|-------|--------------|--------------|--------|
| 1     | 17.62           | 0.95  | 30.60        | 1958.84      | 50.27  |
| 2     | 32.19           | 1.34  | 17.03        | 1937.81      | 49.73  |
| Total |                 |       |              | 3896.65      | 100.00 |

Säule: DAICELAS.M  
Säuleninfo: Chiralpak AS (250x4,6)mm  
Operator: Analytik Labor AK Schoenebeck

Injektion Time: 13:07:47  
Injektion Date: 21.08.2017

Instrument Conditions: At Start At Stop  
Temperature in °C: 30.0°C 30.0°C  
Pressure in bar: 25.7 26.2  
Flow in ml/min: 0.70 0.70

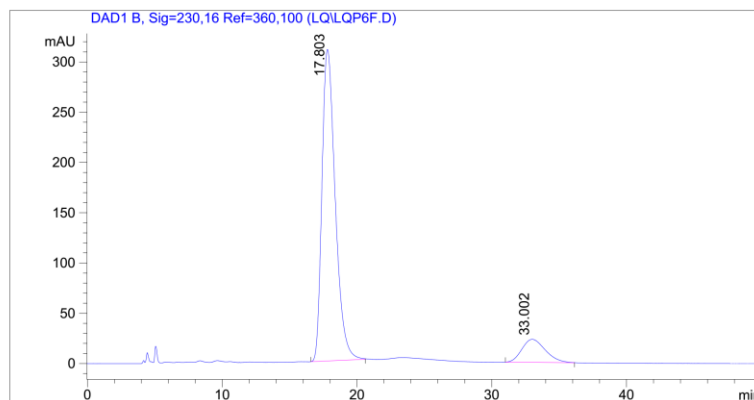

| #     | Ret. Time (min) | Width | Height (mAU) | Area (mAU*s) | Area % |
|-------|-----------------|-------|--------------|--------------|--------|
| 1     | 17.80           | 1.05  | 309.92       | 21189.97     | 88.34  |
| 2     | 33.00           | 1.44  | 23.05        | 2796.95      | 11.66  |
| Total |                 |       |              | 23986.92     | 100.00 |

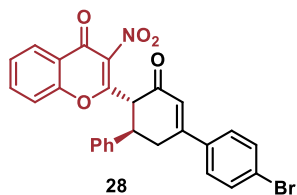

Sample Info: Mobile phase: n-Heptane/EtOH 7:3;  
The sample is solved in DCM/MP

Säule: DAICELAS.M  
Säuleninfo: Chiralpak AS (250x4,6)mm  
Operator: Analytik Labor AK Schoenebeck

Injektion Time: 11:25:28  
Injektion Date: 29.08.2017

Instrument Conditions: At Start At Stop  
Temperature in °C: 30.0 °C 30.0 °C  
Pressure in bar: 26.6 26.6  
Flow in ml/min: 0.70 0.70

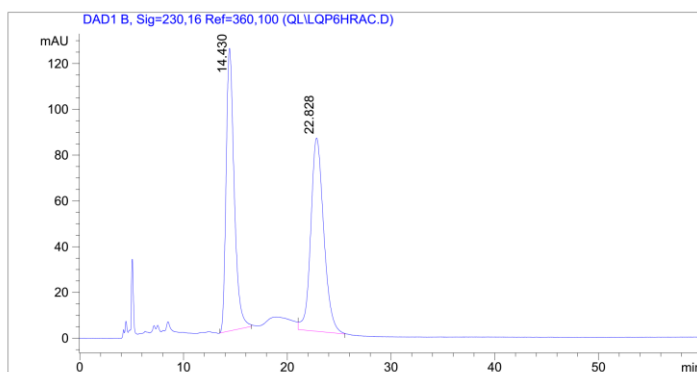

| #     | Ret. Time (min) | Width | Height (mAU) | Area (mAU*s) | Area % |
|-------|-----------------|-------|--------------|--------------|--------|
| 1     | 14.43           | 0.81  | 123.50       | 6671.15      | 47.60  |
| 2     | 22.83           | 1.29  | 84.50        | 7345.15      | 52.40  |
| Total |                 |       |              | 14016.31     | 100.00 |

Säule: DAICELAS.M  
Säuleninfo: Chiralpak AS (250x4,6)mm  
Operator: Analytik Labor AK Schoenebeck

Injektion Time: 16:04:13  
Injektion Date: 23.08.2017

Instrument Conditions: At Start At Stop  
Temperature in °C: 30.0 °C 30.0 °C  
Pressure in bar: 25.8 26.1  
Flow in ml/min: 0.70 0.70

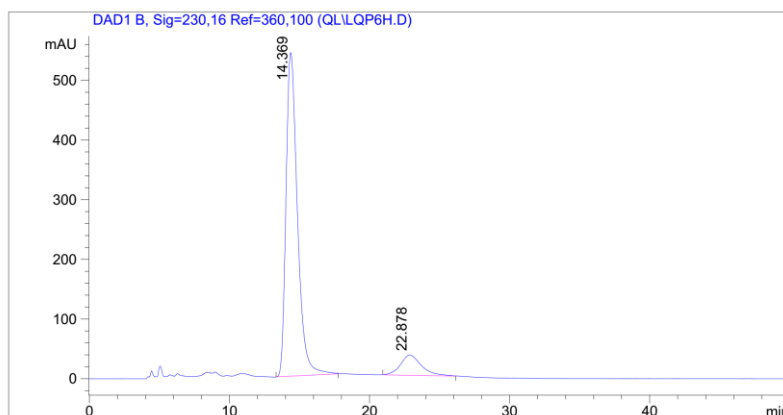

| #     | Ret. Time (min) | Width | Height (mAU) | Area (mAU*s) | Area % |
|-------|-----------------|-------|--------------|--------------|--------|
| 1     | 14.37           | 0.86  | 542.40       | 30707.58     | 89.56  |
| 2     | 22.88           | 1.43  | 33.95        | 3579.40      | 10.44  |
| Total |                 |       |              | 34286.98     | 100.00 |

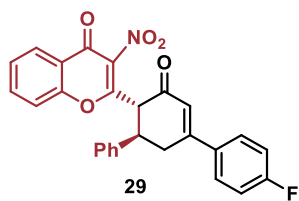

Sample Info: Mobile phase: n-Heptane/EtOH 7:3;  
The sample is solved in DCM/MP

Column: DAICELAS.M  
Column info: Chiralcel OD (250x4,6)mm  
Operator: Analytik Labor AKEN

Injektion Time: 13:59:40  
Injektion Date: 23.06.2017

Instrument Conditions: At Start At Stop  
Temperature in °C: 30.0°C 30.0°C  
Pressure in bar: 25.3 25.8  
Flow in ml/min: 0.70 0.70

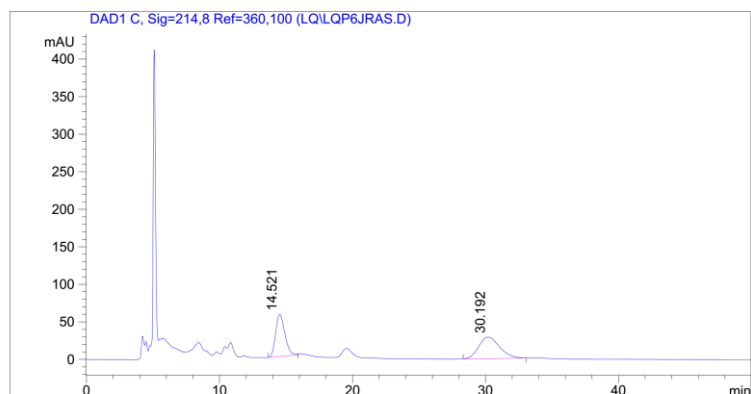

| #     | Ret. Time (min) | Width | Height (mAU) | Area (mAU*s) | Area % |
|-------|-----------------|-------|--------------|--------------|--------|
| 1     | 14.52           | 0.74  | 56.07        | 2714.64      | 46.36  |
| 2     | 30.19           | 1.43  | 28.69        | 3140.64      | 53.64  |
| Total |                 |       |              | 5855.28      | 100.00 |

Injektion Time: 16:55:27  
Injektion Date: 23.08.2017

Instrument Conditions: At Start At Stop  
Temperature in °C: 30.0°C 30.0°C  
Pressure in bar: 26.2 26.8  
Flow in ml/min: 0.70 0.70

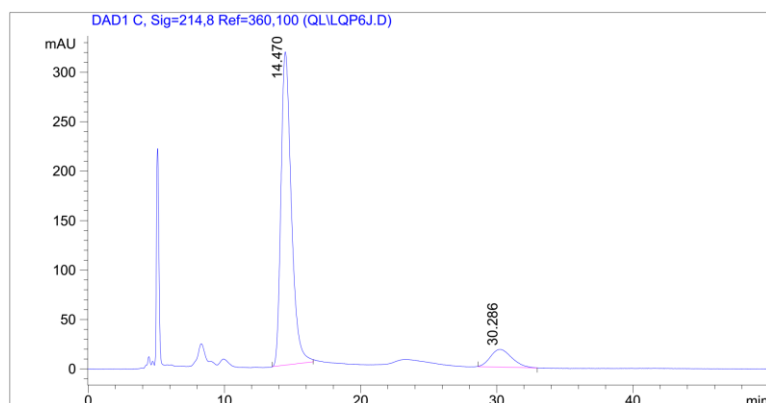

| #     | Ret. Time (min) | Width | Height (mAU) | Area (mAU*s) | Area % |
|-------|-----------------|-------|--------------|--------------|--------|
| 1     | 14.47           | 0.80  | 316.82       | 16720.50     | 89.48  |
| 2     | 30.29           | 1.33  | 17.95        | 1966.02      | 10.52  |
| Total |                 |       |              | 18686.53     | 100.00 |



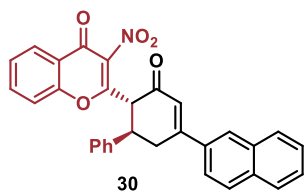

Sample Info: Mobile phase: n-Heptane/EtOH 7:3;  
The sample is solved in DCM/MP

Column: DAICELAS.M  
Column info: Chiralcel OD (250x4,6)mm  
Operator: Analytik Labor AKEN

Injektion Time: 14:50:52  
Injektion Date: 23.06.2017

Instrument Conditions: At Start At Stop  
Temperature in °C: 30.0 °C 30.0 °C  
Pressure in bar: 25.4 26.1  
Flow in ml/min: 0.70 0.70

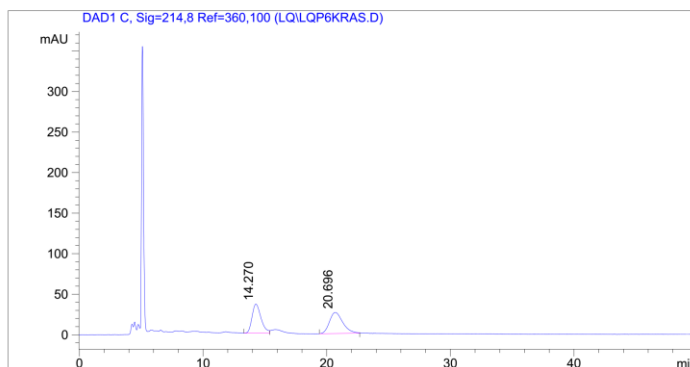

| #     | Ret. Time (min) | Width | Height (mAU) | Area (mAU*s) | Area % |
|-------|-----------------|-------|--------------|--------------|--------|
| 1     | 14.27           | 0.78  | 36.06        | 1826.98      | 48.17  |
| 2     | 20.70           | 1.08  | 26.06        | 1966.13      | 51.83  |
| Total |                 |       |              | 3793.11      | 100.00 |

Säule: DAICELAS.M  
Säuleninfo: Chiralpak AS (250x4,6)mm  
Operator: Analytik Labor AK Schoenebeck

Injektion Time: 17:46:42  
Injektion Date: 23.08.2017

Instrument Conditions: At Start At Stop  
Temperature in °C: 30.0 °C 30.0 °C  
Pressure in bar: 26.0 26.7  
Flow in ml/min: 0.70 0.70

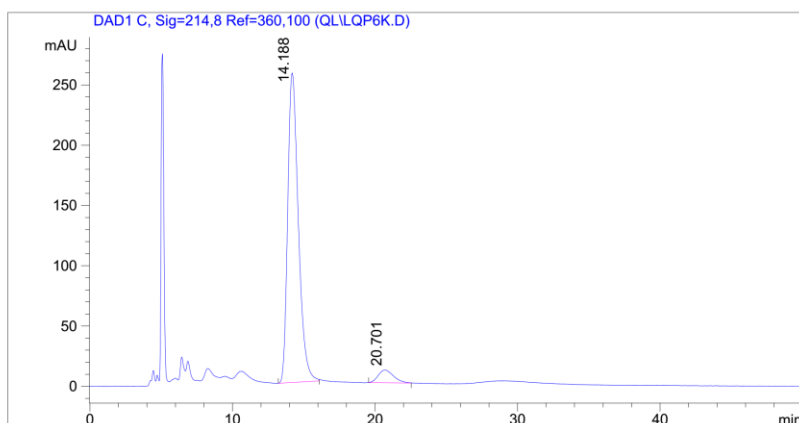

| #     | Ret. Time (min) | Width | Height (mAU) | Area (mAU*s) | Area % |
|-------|-----------------|-------|--------------|--------------|--------|
| 1     | 14.19           | 0.81  | 256.74       | 13294.36     | 94.34  |
| 2     | 20.70           | 0.91  | 10.64        | 797.81       | 5.66   |
| Total |                 |       |              | 14092.17     | 100.00 |

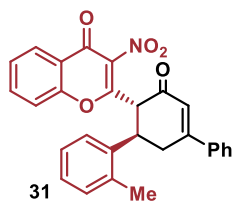

Sample Info: Mobile phase: n-Heptane/EtOH 7:3;  
The sample is solved in DCM/MP

Column: DAICELAS.M  
Column info: Chiralcel OD (250x4,6)mm  
Operator: Analytik Labor AKEN

Injektion Time: 15:42:07  
Injektion Date: 23.06.2017

Instrument Conditions: At Start At Stop  
Temperature in°C: 30.0°C 30.0°C  
Pressure in bar: 25.4 26.0  
Flow in ml/min: 0.70 0.70

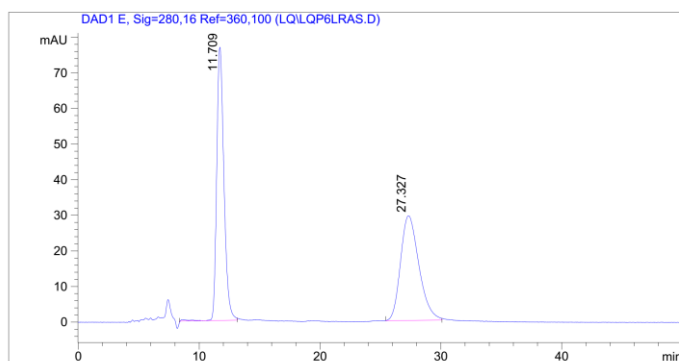

| #     | Ret. Time (min) | Width | Height (mAU) | Area (mAU*s) | Area % |
|-------|-----------------|-------|--------------|--------------|--------|
| 1     | 11.71           | 0.64  | 76.71        | 3192.84      | 50.71  |
| 2     | 27.33           | 1.55  | 29.38        | 3103.16      | 49.29  |
| Total |                 |       |              | 6296.00      | 100.00 |

Säule: DAICELAS.M  
Säuleninfo: Chiralpak AS (250x4,6)mm  
Operator: Analytik Labor AK Schoenebeck

Injektion Time: 18:37:51  
Injektion Date: 23.08.2017

Instrument Conditions: At Start At Stop  
Temperature in°C: 30.0°C 30.0°C  
Pressure in bar: 26.1 26.7  
Flow in ml/min: 0.70 0.70

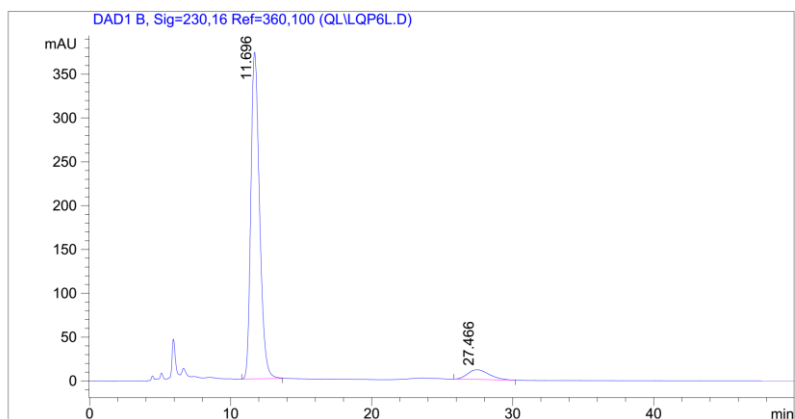

| #     | Ret. Time (min) | Width | Height (mAU) | Area (mAU*s) | Area % |
|-------|-----------------|-------|--------------|--------------|--------|
| 1     | 11.70           | 0.66  | 372.75       | 15968.83     | 93.10  |
| 2     | 27.47           | 1.28  | 11.13        | 1182.83      | 6.90   |
| Total |                 |       |              | 17151.66     | 100.00 |

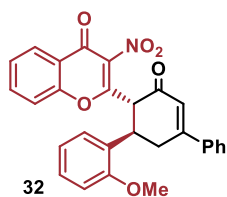

Sample Info: Mobile phase: n-Heptane/EtOH 7:3;  
The sample is solved in DCM/MP

Column: DAICELAS.M  
Column info: Chiralcel OD (250x4,6)mm  
Operator: Analytik Labor AKEN

Injektion Time: 16:33:19  
Injektion Date: 23.06.2017

Instrument Conditions: At Start At Stop  
Temperature in°C: 30.0°C 30.0°C  
Pressure in bar: 25.5 26.2  
Flow in ml/min: 0.70 0.70

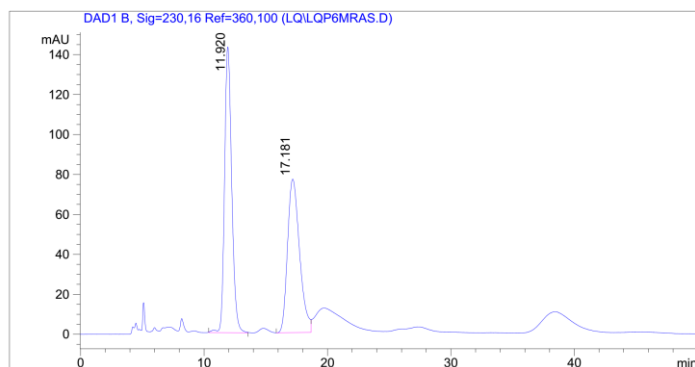

| #     | Ret. Time (min) | Width | Height (mAU) | Area (mAU*s) | Area % |
|-------|-----------------|-------|--------------|--------------|--------|
| 1     | 11.92           | 0.62  | 143.08       | 5774.63      | 52.56  |
| 2     | 17.18           | 1.05  | 76.84        | 5212.39      | 47.44  |
| Total |                 |       |              | 10987.02     | 100.00 |

Säule: DAICELAS.M  
Säuleninfo: Chiralpak AS (250x4,6)mm  
Operator: Analytik Labor AK Schoenebeck

Injektion Time: 15:40:21  
Injektion Date: 28.08.2017

Instrument Conditions: At Start At Stop  
Temperature in°C: 30.0°C 30.0°C  
Pressure in bar: 26.3 26.9  
Flow in ml/min: 0.70 0.70

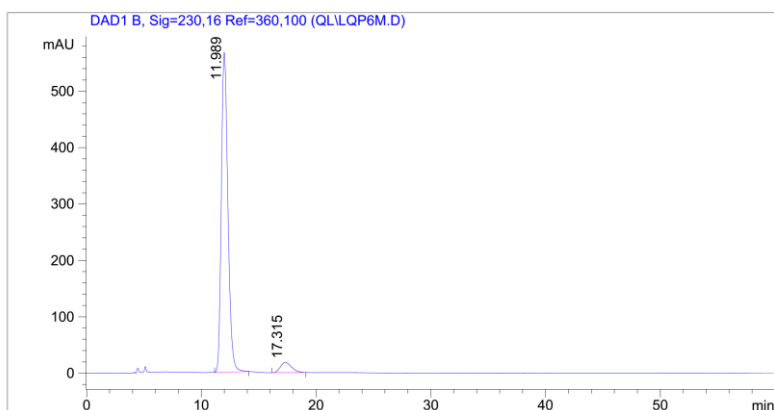

| #     | Ret. Time (min) | Width | Height (mAU) | Area (mAU*s) | Area % |
|-------|-----------------|-------|--------------|--------------|--------|
| 1     | 11.99           | 0.61  | 567.07       | 22484.47     | 94.78  |
| 2     | 17.32           | 0.97  | 18.25        | 1237.77      | 5.22   |
| Total |                 |       |              | 23722.24     | 100.00 |

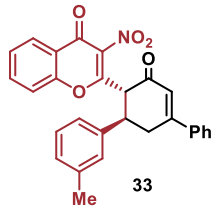

Sample Info: Mobile phase: n-Heptane/EtOH 7:3;  
The sample is solved in DCM/MP

Column: DAICELAS.M  
Column info: Chiralcel OD (250x4,6)mm  
Operator: Analytik Labor AKEN

Injektion Time: 17:24:35  
Injektion Date: 23.06.2017

Instrument Conditions: At Start At Stop  
Temperature in °C: 30.0°C 30.0°C  
Pressure in bar: 26.0 26.4  
Flow in ml/min: 0.70 0.70

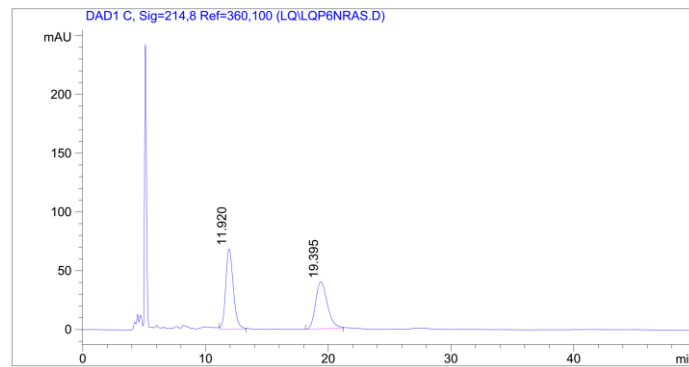

| #     | Ret. Time (min) | Width | Height (mAU) | Area (mAU*s) | Area % |
|-------|-----------------|-------|--------------|--------------|--------|
| 1     | 11.92           | 0.67  | 68.26        | 2935.76      | 52.36  |
| 2     | 19.40           | 1.03  | 39.99        | 2671.08      | 47.64  |
| Total |                 |       |              | 5606.85      | 100.00 |

Säule: DAICELAS.M  
Säuleninfo: Chiralpak AS (250x4,6)mm  
Operator: Analytik Labor AK Schoenebeck

Injektion Time: 16:41:34  
Injektion Date: 28.08.2017

Instrument Conditions: At Start At Stop  
Temperature in °C: 30.0°C 30.0°C  
Pressure in bar: 26.5 26.5  
Flow in ml/min: 0.70 0.70

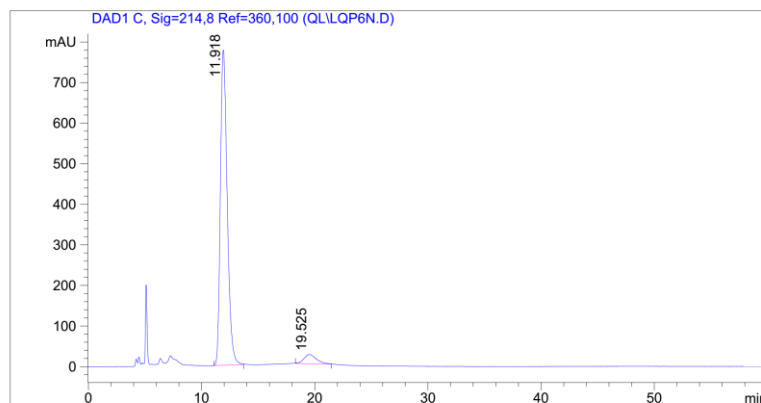

| #     | Ret. Time (min) | Width | Height (mAU) | Area (mAU*s) | Area % |
|-------|-----------------|-------|--------------|--------------|--------|
| 1     | 11.92           | 0.65  | 777.08       | 32487.76     | 94.76  |
| 2     | 19.53           | 0.99  | 22.92        | 1798.10      | 5.24   |
| Total |                 |       |              | 34285.86     | 100.00 |

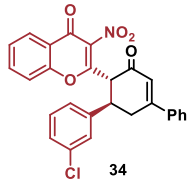

Sample Info: Mobile phase: n-Heptane/EtOH 7:3;  
The sample is solved in DCM/MP

Column: DAICELAS.M  
Column info: Chiralcel OD (250x4,6)mm  
Operator: Analytik Labor AKEN

Injektion Time: 19:07:06  
Injektion Date: 23.06.2017

Instrument Conditions: At Start At Stop  
Temperature in °C: 30.0 °C 30.0 °C  
Pressure in bar: 25.7 26.4  
Flow in ml/min: 0.70 0.70

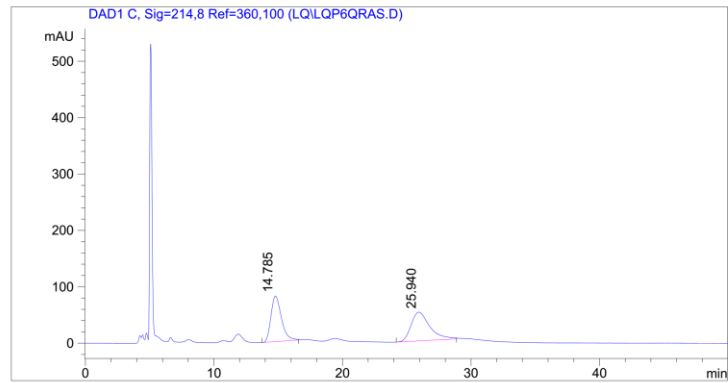

| #     | Ret. Time (min) | Width | Height (mAU) | Area (mAU*s) | Area % |
|-------|-----------------|-------|--------------|--------------|--------|
| 1     | 14.79           | 0.87  | 80.90        | 4595.26      | 47.03  |
| 2     | 25.94           | 1.49  | 51.03        | 5174.71      | 52.97  |
| Total |                 |       |              | 9769.97      | 100.00 |

Säule: DAICELAS.M  
Säuleninfo: Chiralpak AS (250x4,6)mm  
Operator: Analytik Labor AK Schoenebeck

Injektion Time: 14:26:49  
Injektion Date: 07.09.2017

Instrument Conditions: At Start At Stop  
Temperature in °C: 30.0 °C 30.0 °C  
Pressure in bar: 29.9 30.0  
Flow in ml/min: 0.70 0.70

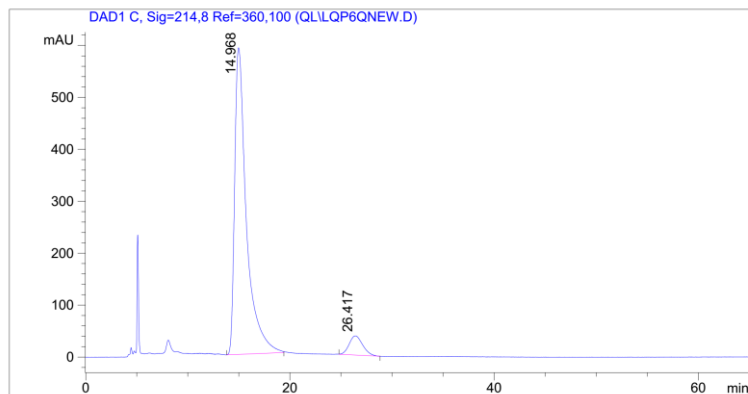

| #     | Ret. Time (min) | Width | Height (mAU) | Area (mAU*s) | Area % |
|-------|-----------------|-------|--------------|--------------|--------|
| 1     | 14.97           | 1.17  | 590.61       | 47276.66     | 93.28  |
| 2     | 26.42           | 1.13  | 37.02        | 3404.79      | 6.72   |
| Total |                 |       |              | 50681.45     | 100.00 |

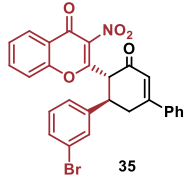

Sample Info: Mobile phase: n-Heptane/EtOH 7:3;  
The sample is solved in DCM/MP

Column: DAICELAS.M  
Column info: Chiralcel OD (250x4,6)mm  
Operator: Analytik Labor AKEN

Injektion Time: 20:49:35  
Injektion Date: 23.06.2017

Instrument Conditions: At Start At Stop  
Temperature in°C: 30.0°C 30.0°C  
Pressure in bar: 25.9 26.2  
Flow in ml/min: 0.70 0.70

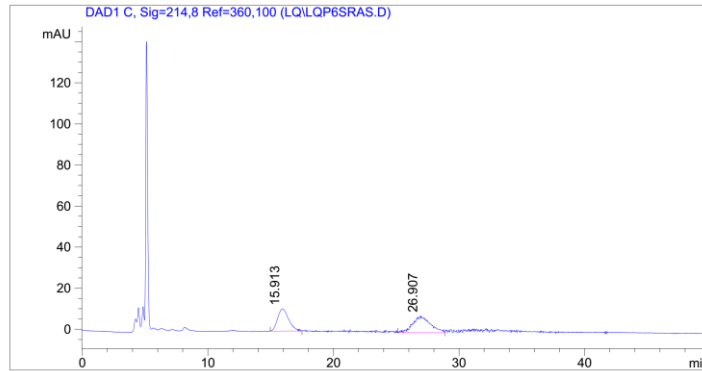

| #     | Ret. Time (min) | Width | Height (mAU) | Area (mAU*s) | Area % |
|-------|-----------------|-------|--------------|--------------|--------|
| 1     | 15.91           | 0.87  | 10.84        | 671.15       | 46.81  |
| 2     | 26.91           | 1.13  | 8.07         | 762.71       | 53.19  |
| Total |                 |       |              | 1433.86      | 100.00 |

Säule: DAICELAS.M  
Säuleninfo: Chiralpak AS (250x4,6)mm  
Operator: Analytik Labor AK Schoenebeck

Injektion Time: 15:33:03  
Injektion Date: 07.09.2017

Instrument Conditions: At Start At Stop  
Temperature in°C: 30.0°C 30.0°C  
Pressure in bar: 29.8 29.9  
Flow in ml/min: 0.70 0.70

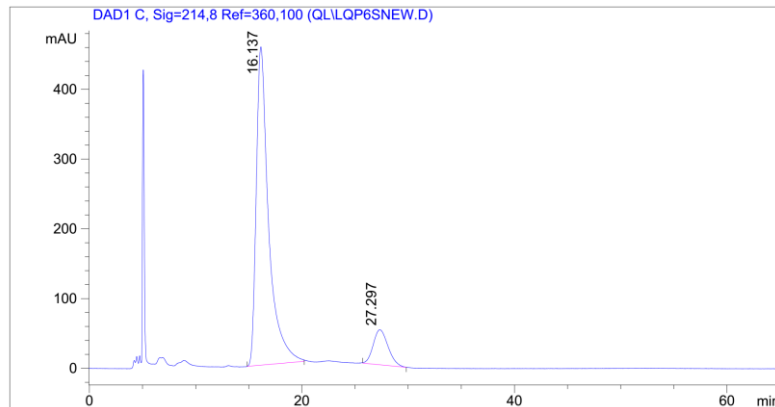

| #     | Ret. Time (min) | Width | Height (mAU) | Area (mAU*s) | Area % |
|-------|-----------------|-------|--------------|--------------|--------|
| 1     | 16.14           | 1.14  | 456.47       | 36952.69     | 88.32  |
| 2     | 27.30           | 1.15  | 50.27        | 4887.23      | 11.68  |
| Total |                 |       |              | 41839.92     | 100.00 |

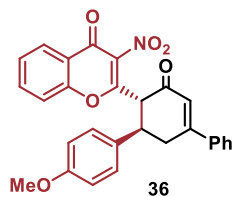

Sample Info: Mobile phase: n-Heptane/EtOH 7:3;  
The sample is solved in DCM/MP

Column: DAICELAS.M  
Column info: Chiralcel OD (250x4,6)mm  
Operator: Analytik Labor AKEN

Injektion Time: 18:15:51  
Injektion Date: 23.06.2017

Instrument Conditions: At Start At Stop  
Temperature in °C: 30.0°C 30.0°C  
Pressure in bar: 25.6 25.8  
Flow in ml/min: 0.70 0.70

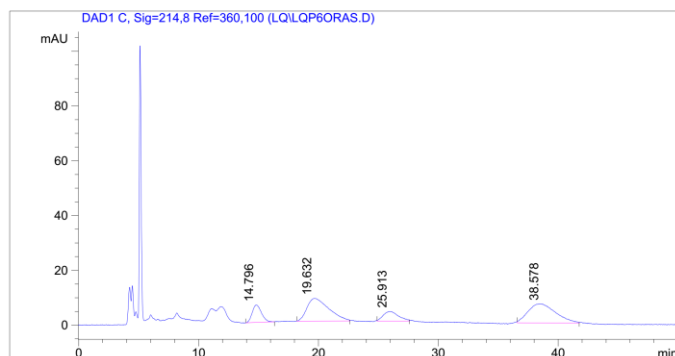

| #     | Ret. Time (min) | Width | Height (mAU) | Area (mAU*s) | Area % |
|-------|-----------------|-------|--------------|--------------|--------|
| 1     | 14.80           | 0.65  | 6.41         | 344.15       | 12.20  |
| 2     | 19.63           | 1.54  | 8.28         | 1055.16      | 37.41  |
| 3     | 25.91           | 1.04  | 3.54         | 308.56       | 10.94  |
| 4     | 38.58           | 1.87  | 7.01         | 1112.52      | 39.45  |
| Total |                 |       |              | 2820.39      | 100.00 |

Säule: DAICELAS.M  
Säuleninfo: Chiralpak AS (250x4,6)mm  
Operator: Analytik Labor AK Schoenebeck

Injektion Time: 17:42:46  
Injektion Date: 28.08.2017

Instrument Conditions: At Start At Stop  
Temperature in °C: 30.0°C 30.0°C  
Pressure in bar: 26.1 27.0  
Flow in ml/min: 0.70 0.70

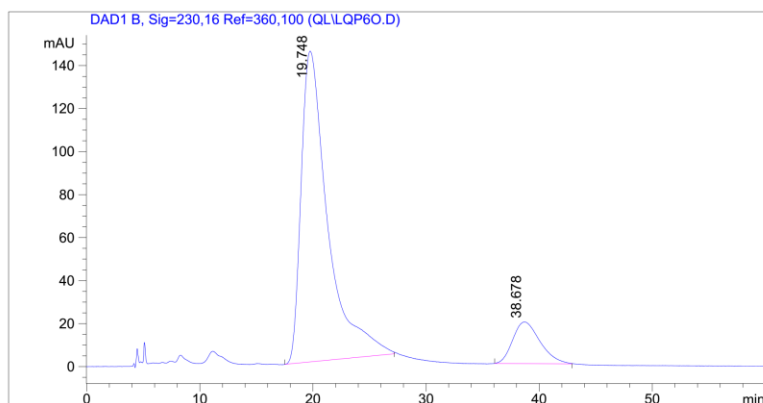

| #     | Ret. Time (min) | Width | Height (mAU) | Area (mAU*s) | Area % |
|-------|-----------------|-------|--------------|--------------|--------|
| 1     | 19.75           | 2.24  | 144.58       | 23696.35     | 87.87  |
| 2     | 38.68           | 1.98  | 19.42        | 3270.60      | 12.13  |
| Total |                 |       |              | 26966.95     | 100.00 |

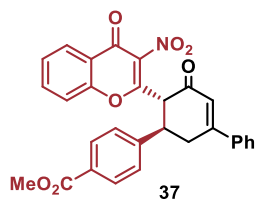

Sample Info: Mobile phase: n-Heptane/EtOH 7:3;  
The sample is solved in DCM/MP

Column: DAICELAS.M  
Column info: Chiralcel OD (250x4,6)mm  
Operator: Analytik Labor AKEN

Injektion Time: 19:58:20  
Injektion Date: 23.06.2017

Instrument Conditions: At Start At Stop  
Temperature in °C: 30.0°C 30.0°C  
Pressure in bar: 25.7 26.5  
Flow in ml/min: 0.70 0.70

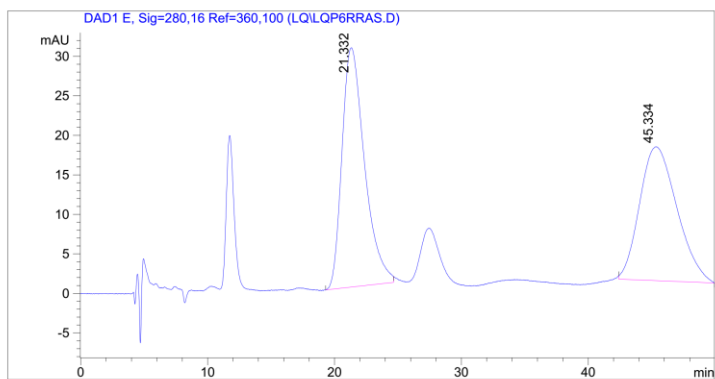

| #     | Ret. Time (min) | Width | Height (mAU) | Area (mAU*s) | Area % |
|-------|-----------------|-------|--------------|--------------|--------|
| 1     | 21.33           | 1.79  | 30.30        | 3747.23      | 51.98  |
| 2     | 45.33           | 2.40  | 16.96        | 3461.52      | 48.02  |
| Total |                 |       |              | 7208.75      | 100.00 |

Säule: DAICELAS.M  
Säuleninfo: Chiralpak AS (250x4,6)mm  
Operator: Analytik Labor AK Schoenebeck

Injektion Time: 19:45:15  
Injektion Date: 28.08.2017

Instrument Conditions: At Start At Stop  
Temperature in °C: 30.0°C 30.0°C  
Pressure in bar: 26.5 27.2  
Flow in ml/min: 0.70 0.70

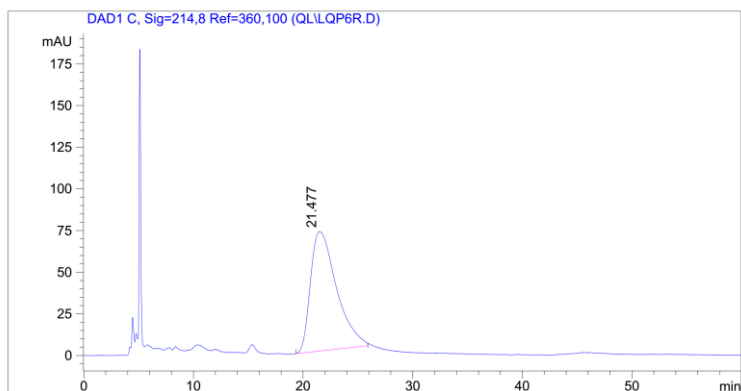

| #     | Ret. Time (min) | Width | Height (mAU) | Area (mAU*s) | Area % |
|-------|-----------------|-------|--------------|--------------|--------|
| 1     | 21.48           | 1.94  | 71.74        | 11822.18     | 100.00 |
| Total |                 |       |              | 11822.18     | 100.00 |



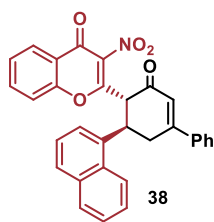

Sample Info: Mobile phase: n-Heptane/EtOH 7:3;  
The sample is solved in DCM/MP

Column: DAICELAS.M  
Column info: Chiralcel OD (250x4,6)mm  
Operator: Analytik Labor AKEN

Injektion Time: 23:23:14  
Injektion Date: 23.06.2017

Instrument Conditions: At Start At Stop  
Temperature in °C: 30.0 °C 30.0 °C  
Pressure in bar: 26.1 26.5  
Flow in ml/min: 0.70 0.70

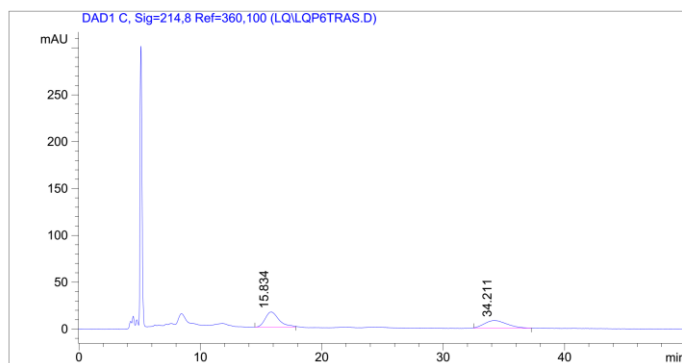

| #     | Ret. Time (min) | Width | Height (mAU) | Area (mAU*s) | Area % |
|-------|-----------------|-------|--------------|--------------|--------|
| 1     | 15.83           | 1.10  | 16.13        | 1288.34      | 54.78  |
| 2     | 34.21           | 1.57  | 8.14         | 1063.58      | 45.22  |
| Total |                 |       |              | 2351.92      | 100.00 |

Column: AS.M  
Column-info: Chiralpak AS (250x4,6)mm  
Operator: Analytical Lab 4.04

Injektion Time: 20:45:40  
Injektion Date: 12.10.2017

Instrument Conditions: At Start At Stop  
Temperature in °C: 30.0 30.0  
Pressure in bar: 26.2 26.3  
Flow in ml/min: 0.7 0.7

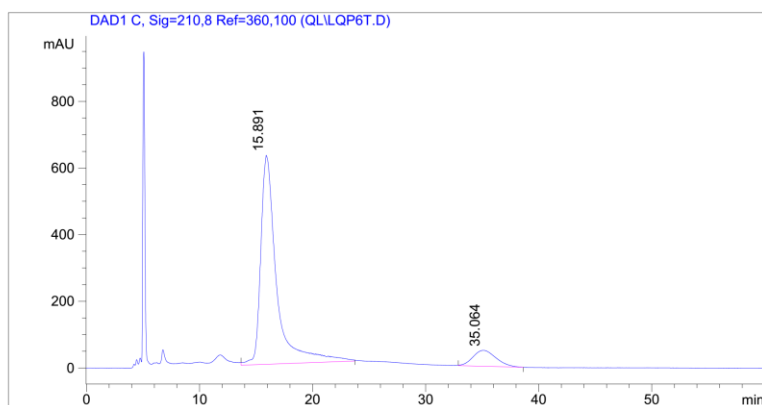

| #     | Ret. Time (min) | Width | Height (mAU) | Area (mAU*s) | Area % |
|-------|-----------------|-------|--------------|--------------|--------|
| 1     | 15.89           | 1.63  | 627.90       | 61542.00     | 90.06  |
| 2     | 35.06           | 1.68  | 47.81        | 6795.59      | 9.94   |
| Total |                 |       |              | 68337.59     | 100.00 |

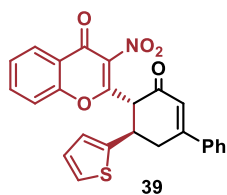

Sample Info: Mobile phase: n-Heptane/EtOH 7:3;  
The sample is solved in DCM/MP

Column: DAICELAS.M  
Column info: Chiralcel OD (250x4,6)mm  
Operator: Analytik Labor AKEN

Injektion Time: 21:40:46  
Injektion Date: 23.06.2017

Instrument Conditions: At Start At Stop  
Temperature in °C: 30.0°C 30.0°C  
Pressure in bar: 26.1 26.1  
Flow in ml/min: 0.70 0.70

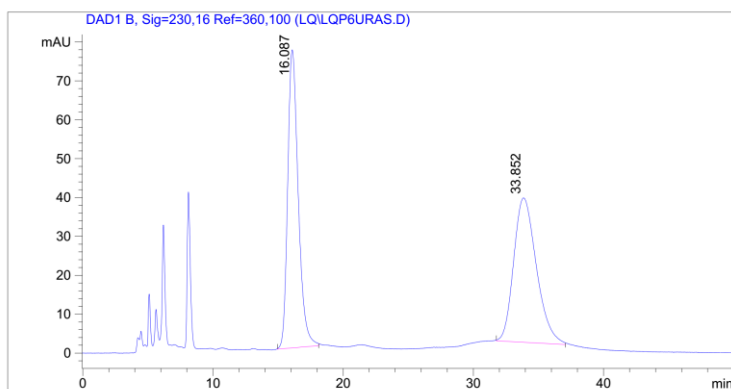

| #     | Ret. Time (min) | Width | Height (mAU) | Area (mAU*s) | Area % |
|-------|-----------------|-------|--------------|--------------|--------|
| 1     | 16.09           | 0.86  | 76.68        | 4312.57      | 48.88  |
| 2     | 33.85           | 1.83  | 37.15        | 4510.35      | 51.12  |
| Total |                 |       |              | 8822.93      | 100.00 |

Säule: DAICELAS.M  
Säuleninfo: Chiralpak AS (250x4,6)mm  
Operator: Analytik Labor AK Schoenebeck

Injektion Time: 17:45:34  
Injektion Date: 07.09.2017

Instrument Conditions: At Start At Stop  
Temperature in °C: 30.0°C 30.0°C  
Pressure in bar: 29.6 30.1  
Flow in ml/min: 0.70 0.70

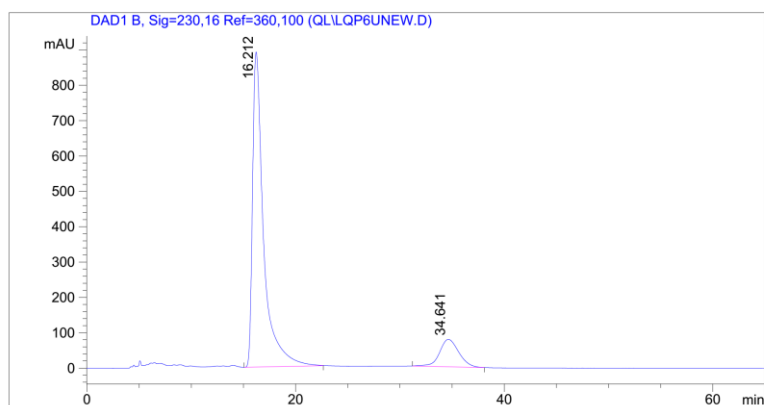

| #     | Ret. Time (min) | Width | Height (mAU) | Area (mAU*s) | Area % |
|-------|-----------------|-------|--------------|--------------|--------|
| 1     | 16.21           | 1.08  | 891.70       | 65623.46     | 86.79  |
| 2     | 34.64           | 1.74  | 77.66        | 9992.33      | 13.21  |
| Total |                 |       |              | 75615.79     | 100.00 |

## 5 References

1. (a) Hafez EAA, Elnagdi MH, Elagamey AGA, El-Taweel FMAA. *Heterocycles*, 1987, 26: 903-907; (b) Upadhyay K, Bavishi A, Thakrar S, Radadiya A, Vala H, Parekh S, Bhavsar D, Savant M, Parmar M, Adlakha P, Shah A. *Bioorg Med Chem Lett* 2011, 21: 2547–2549; (c) Levchenko KS, Chudov KA., Zinoviev EV, Lyssenko KA, Fakhrutdinov AN, Demin DU, Poroshin NO, Zhukova AA, Shmelin PS, Grebennikov EP. *Mendeleev Commun*, 2019, 29: 301–303.
2. Paparao C, Rao KV, Sundaramurthy V. *Synthesis*, 1981, 3: 234-236.
